# Supplementary material for: Transcriptomic analysis of resistant and susceptible banana corms in response to infection by Fusarium oxysporum f. sp. cubense tropical race 4
Source: PubMed Central journal article supplement (PMC6546912; doi:10.1038/s41598-019-44637-x), 2019-06-03
Supplement: 41598_2019_44637_MOESM1_ESM.pdf [file 41598_2019_44637_MOESM1_ESM.pdf]

# **Transcriptomic analysis of resistant and susceptible banana corms in response to infection by *Fusarium oxysporum* f. sp. *cubense* tropical race 4**

Lei Zhang<sup>1, 2, 6</sup>, Alberto Cenci<sup>4</sup>, Mathieu Rouard<sup>4</sup>, Dong Zhang<sup>5</sup>, Yunyue Wang<sup>1,\*</sup>, Weihua Tang<sup>5,\*</sup>  
& Si-Jun Zheng<sup>2, 3,\*</sup>

<sup>1</sup> State Key Laboratory for Conservation and Utilization of Bio-Resources in Yunnan, Ministry of Education Key Laboratory of Agriculture Biodiversity for Plant Disease Management, Yunnan Agricultural University, Kunming, 650201, China. <sup>2</sup> Agricultural Environment and Resources Institute, Yunnan Academy of Agricultural Sciences, Kunming, 650205, China. <sup>3</sup> Bioversity International, 2238 Beijing Road, Kunming 650205, Yunnan, China. <sup>4</sup> Bioversity International, Parc Scientifique Agropolis II, 34397 Montpellier, Cedex 5 France. <sup>5</sup> National Key Laboratory of Plant Molecular Genetics, CAS Center for Excellence in Molecular Plant Sciences, Institute of Plant Physiology and Ecology, Shanghai Institutes for Biological Sciences, Chinese Academy of Sciences, Shanghai 200032, China. <sup>6</sup> Dehong Agricultural Technology Extension Center, Mangshi, 678400, China. \*Correspondence and requests for materials should be addressed to S.-J.Z. (email: s.zheng@cgiar.org), W.-H.T. (whtang@sibs.ac.cn) & Y.-Y.W. (1371209436@qq.com)

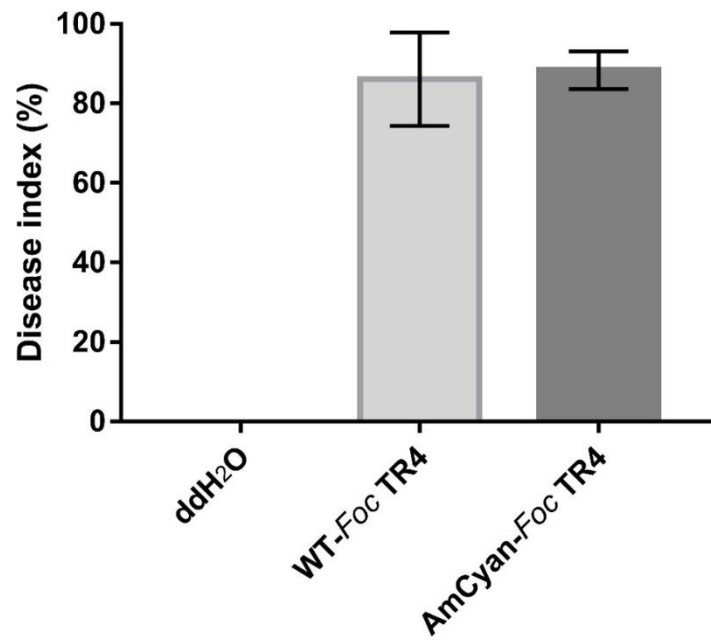

**Supplementary Figure S1 Pathogenicity of AmCyan-Foc TR4 and WT-Foc TR4 derived from Yunnan.**

Disease index of Brazilian inoculated with ddH<sub>2</sub>O, WT-Foc TR4 and AmCyan-Foc TR4 at 28 dpi. Error bars represent standard error of the mean with two independent experiments, and 9 plants were used in each treatment.

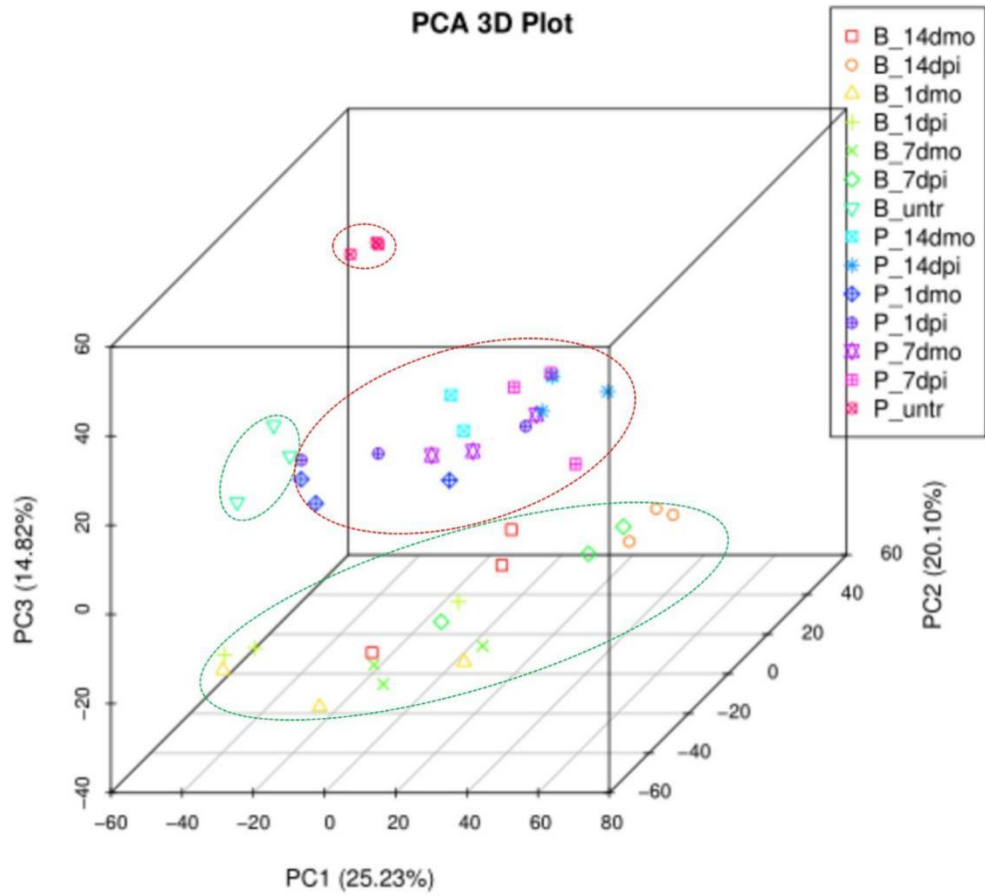

Supplementary Figure S2 Principal component analysis (PCA) of gene expression profiles of all samples.

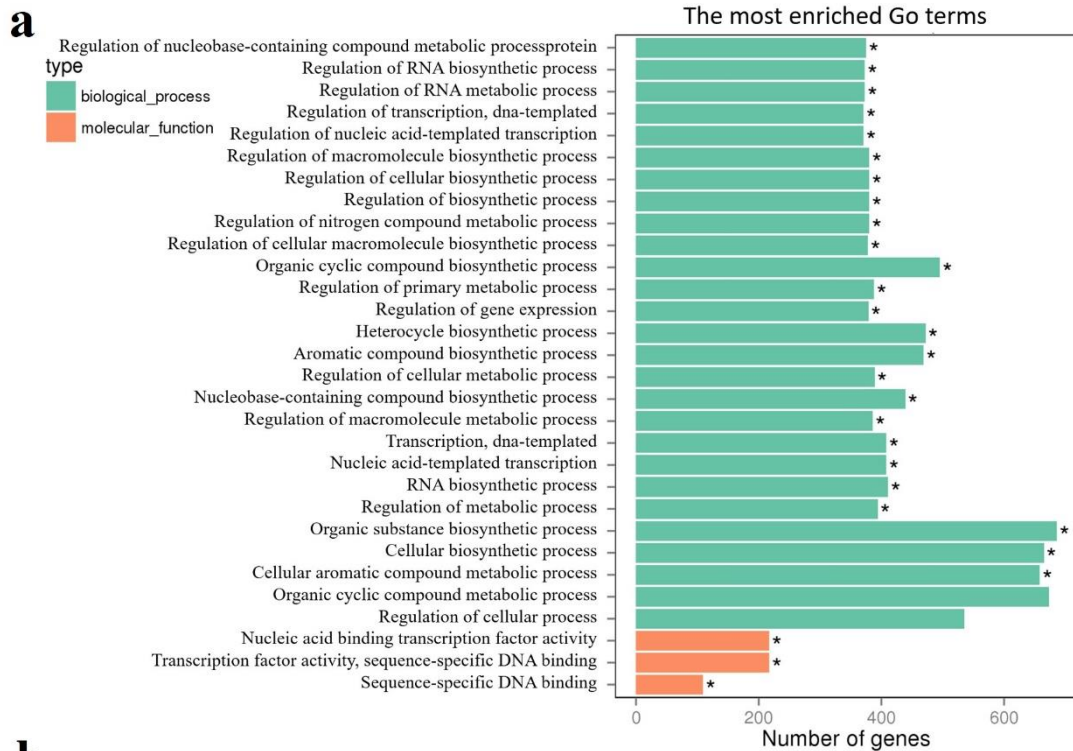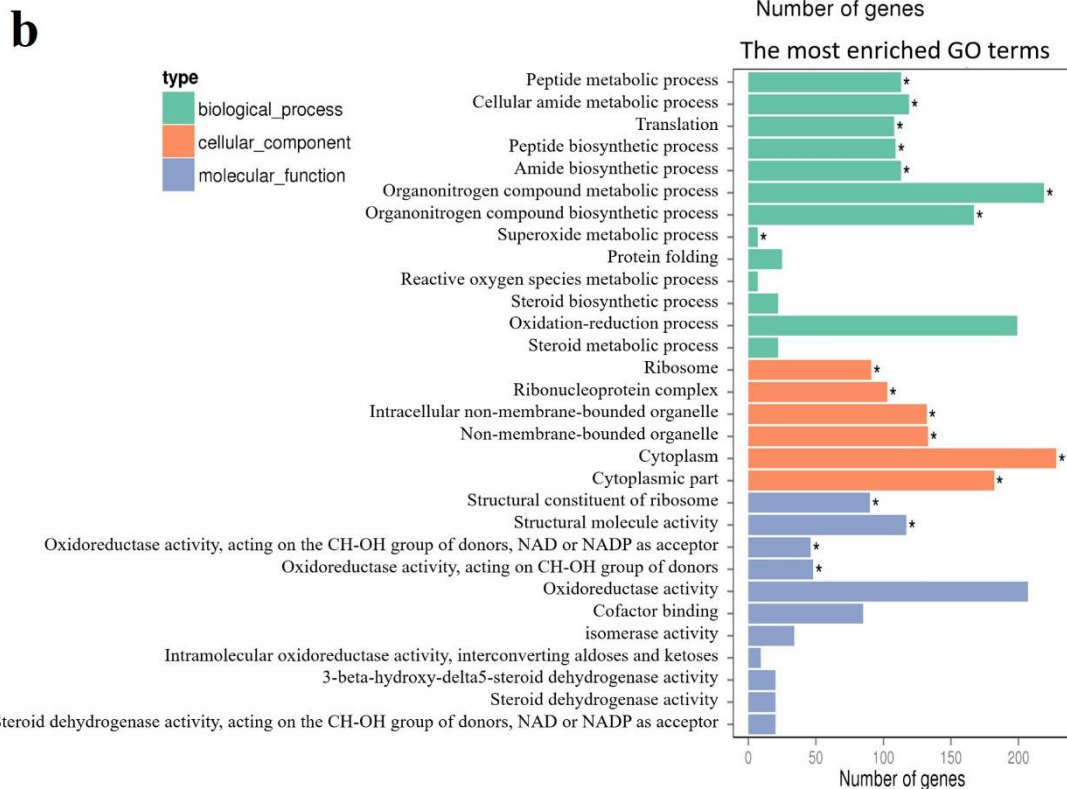

Supplementary Figure S3 Barplots of Pahang<sup>+</sup> (a) and Brazilian<sup>+</sup> (b) DEGs enriched GO terms (P\_untr vs. B\_untr). Asterisks indicate significantly enriched GO terms.

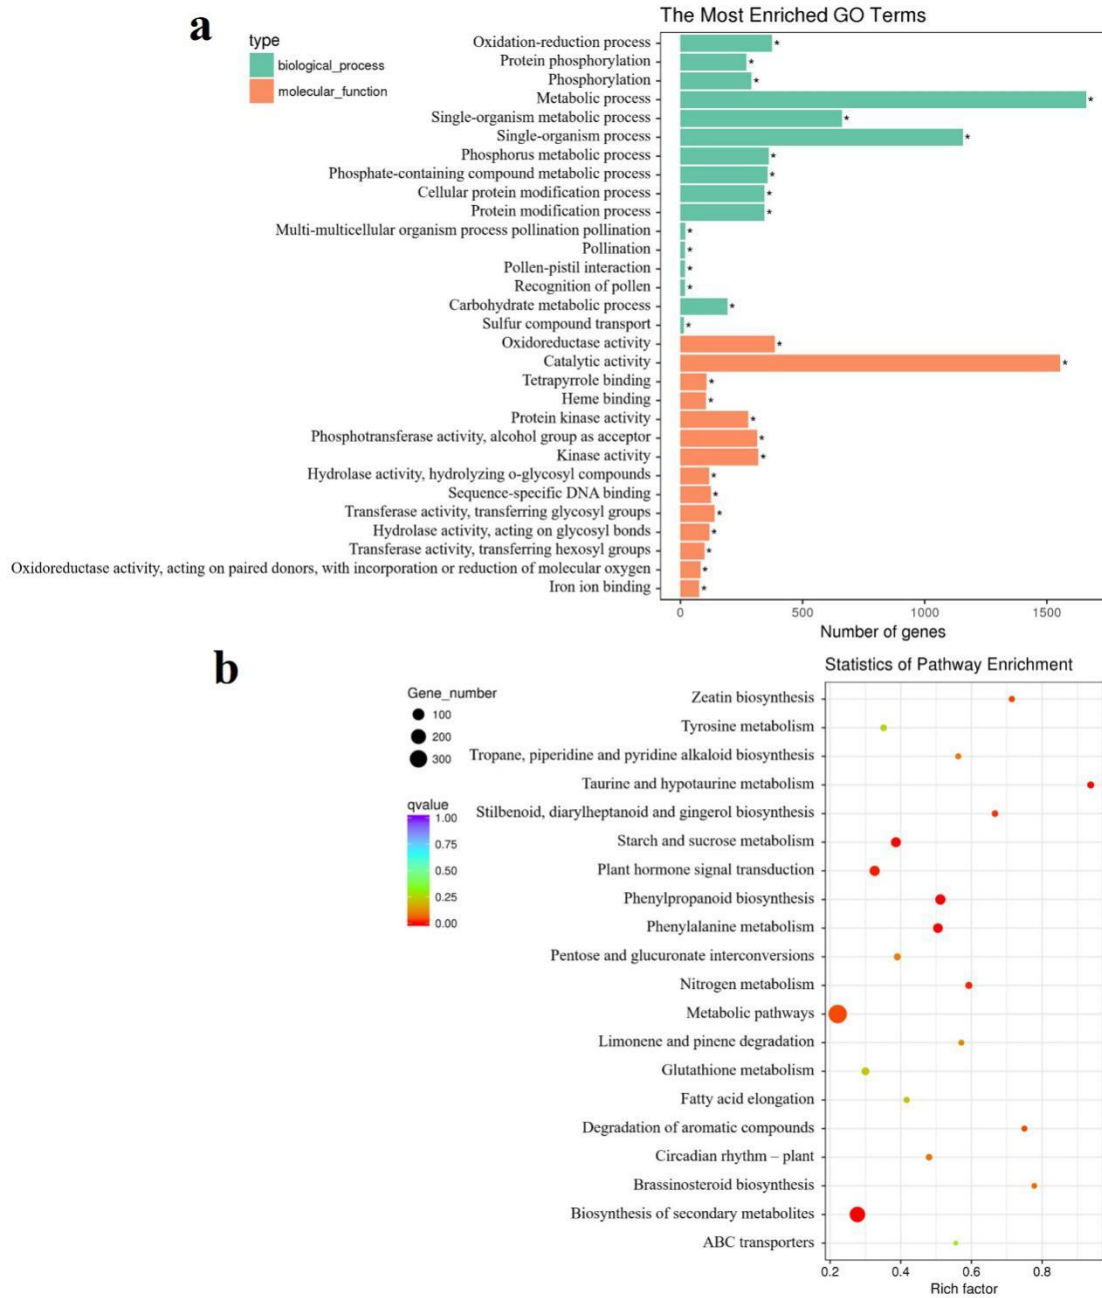

**Supplementary Figure S4 Barplots of DEGs in Brazilian infected samples compared with mock samples (B\_dpi vs. B\_dmo) enriched GO terms (a) and the KEGG pathways (b). Asterisks indicate significantly enriched GO terms.**

**Supplementary Table S1 List of primers used in RT-qPCR**

| Gene id                                | Direction | Sequence/5'-3'        | Product size/bp |
|----------------------------------------|-----------|-----------------------|-----------------|
| Ma05_g26350                            | Forward   | TCAACCTCATTGGCTCCCTG  | 151             |
|                                        | Reverse   | GAGACGTCGTGGGTCTTGAG  |                 |
| Ma08_g28490                            | Forward   | GACTACGTGTGGGTGCAGTT  | 265             |
|                                        | Reverse   | ACCCGCTGTTGAGATCGTAG  |                 |
| Ma02_g12980                            | Forward   | GCAATGACATCTACGCGCTG  | 187             |
|                                        | Reverse   | ATTGCGACTCTGACCATCGG  |                 |
| Ma08_g34160                            | Forward   | GGTTACCTGACCACCAACCC  | 221             |
|                                        | Reverse   | ACGTTACACTTCACACGCAC  |                 |
| Ma06_g10290                            | Forward   | CGTTGTGCTGCTACTTTCGG  | 205             |
|                                        | Reverse   | CAAGAGCAACGACGCATCAC  |                 |
| Ma03_g03840                            | Forward   | CGCCTGGATAGTTTCGCCCTT | 197             |
|                                        | Reverse   | TGGAATCATCGACCTGTGGC  |                 |
| Ma08_g34740                            | Forward   | GCTCGCTCGAGAACATACCA  | 132             |
|                                        | Reverse   | CGTTTGAATGGTGGGCGAAG  |                 |
| Ma03_g01020                            | Forward   | ACGACGACCACTTCGAGAAC  | 232             |
|                                        | Reverse   | ATGTTGCTGCCGACGATGAA  |                 |
| Ma03_g08140                            | Forward   | CCAGCGTTACCATTTCGGCTA | 195             |
|                                        | Reverse   | GGGCAGTAGCTTGTAGGTGG  |                 |
| Ma03_g11650                            | Forward   | ACACCTGCTACGACTTCACG  | 266             |
|                                        | Reverse   | CTTCGACCCTTAGCAGCCTC  |                 |
| Ma08_g34150                            | Forward   | TGTTGAGGTGTTGGACCACG  | 204             |
|                                        | Reverse   | TCCGTCATCTTCTGCACCTC  |                 |
| Ma06_g36690<br>(TIP41, reference gene) | Forward   | TGGGTTGGATGCAAGAAGCA  | 214             |
|                                        | Reverse   | ATTCGCTCGTCACAGTCCTC  |                 |

**Supplementary Table S2 Summary of RNA-seq data quality**

| Sample name | Raw reads (R) | Filtered reads (C)<br>(R/C) | Clean<br>bases | Error rate | Q20    | Q30    |
|-------------|---------------|-----------------------------|----------------|------------|--------|--------|
| Brazilian   | 51793888      | 49626721<br>(95.82%)        | 7.44G          | 0.02%      | 95.44% | 89.20% |
| Pahang      | 50763317      | 48900401<br>(96.33%)        | 7.34G          | 0.02%      | 95.60% | 89.47% |

**Supplementary Table S3 Summary of read mapping**

| Sample           | B_untr   | B_1dmo   | B_7dmo   | B_14dmo  | B_1dpi   | B_7dpi   | B_14dpi  | P_untr   | P_1dmo   | P_7dmo   | P_14dmo  | P_1dpi   | P_7dpi   | P_14dpi  |
|------------------|----------|----------|----------|----------|----------|----------|----------|----------|----------|----------|----------|----------|----------|----------|
| Total reads      | 51351143 | 50383524 | 53350958 | 48374121 | 45490725 | 51389749 | 47046826 | 51429291 | 48448129 | 47491282 | 50447841 | 52380300 | 46206952 | 45899013 |
| Total mapped     | 34346866 | 33020229 | 35403336 | 32040019 | 30029321 | 33871172 | 30053325 | 42508023 | 41072401 | 39951771 | 41482628 | 44115252 | 38687929 | 38081924 |
| Multiple mapped  | (66.89%) | (65.54%) | (66.36%) | (66.23%) | (66.01%) | (65.91%) | (63.88%) | (82.65%) | (84.78%) | (84.12%) | (82.23%) | (84.22%) | (83.73%) | (82.97%) |
| Uniquely mapped  | 314140   | 339597   | 507963   | 374868   | 277733   | 384788   | 450011   | 430958   | 472466   | 422702   | 340781   | 416390   | 391307   | 361180   |
| Read-1           | (0.61%)  | (0.67%)  | (0.95%)  | (0.77%)  | (0.61%)  | (0.75%)  | (0.96%)  | (0.84%)  | (0.98%)  | (0.89%)  | (0.68%)  | (0.79%)  | (0.85%)  | (0.79%)  |
| Read-2           | 34032726 | 32680633 | 34895373 | 31665151 | 29751588 | 33486384 | 29603314 | 42077065 | 40599935 | 39529069 | 41141847 | 43698863 | 38296621 | 37720744 |
| Reads map to '+' | (66.27%) | (64.86%) | (65.41%) | (65.46%) | (65.40%) | (65.16%) | (62.92%) | (81.82%) | (83.80%) | (83.23%) | (81.55%) | (83.43%) | (82.88%) | (82.18%) |
| Reads map to '-' | 17931060 | 17984998 | 18719654 | 16883940 | 16366416 | 18074700 | 16082552 | 22032387 | 21461240 | 20945713 | 22357491 | 23310377 | 20038551 | 19952077 |
| Non-splice reads | (34.92%) | (35.70%) | (35.09%) | (34.90%) | (35.98%) | (35.17%) | (34.18%) | (42.84%) | (44.30%) | (44.10%) | (44.32%) | (44.50%) | (43.37%) | (43.47%) |
| Splice reads     | 16101667 | 14695634 | 16175719 | 14781212 | 13385172 | 15411684 | 13520761 | 20044678 | 19138696 | 18583356 | 18784356 | 20388486 | 18258071 | 17768667 |
| Splice reads     | (31.36%) | (29.17%) | (30.32%) | (30.56%) | (29.42%) | (29.99%) | (28.74%) | (38.98%) | (39.50%) | (39.13%) | (37.24%) | (38.92%) | (39.51%) | (38.71%) |
| Non-splice reads | 16973088 | 16280867 | 17339636 | 15731968 | 14822045 | 16676662 | 14756511 | 20989079 | 20246666 | 19707628 | 20499071 | 21794135 | 19104154 | 18803408 |
| Splice reads     | (33.05%) | (32.31%) | (32.50%) | (32.52%) | (32.58%) | (32.45%) | (31.37%) | (40.81%) | (41.79%) | (41.50%) | (40.63%) | (41.61%) | (41.34%) | (40.97%) |
| Non-splice reads | 17059638 | 16399765 | 17555736 | 15933184 | 14929542 | 16809722 | 14846803 | 21087986 | 20353270 | 19821441 | 20642776 | 21904728 | 19192468 | 18917336 |
| Splice reads     | (33.22%) | (32.55%) | (32.91%) | (32.94%) | (32.82%) | (32.71%) | (31.56%) | (41.00%) | (42.01%) | (41.74%) | (40.92%) | (41.82%) | (41.54%) | (41.22%) |
| Non-splice reads | 21100471 | 19348963 | 21365459 | 19038555 | 17232991 | 20453255 | 18505099 | 28457318 | 25859916 | 25836129 | 26377386 | 27472164 | 24922564 | 24318731 |
| Splice reads     | (41.09%) | (38.40%) | (40.05%) | (39.36%) | (37.88%) | (39.80%) | (39.33%) | (55.33%) | (53.38%) | (54.40%) | (52.29%) | (52.45%) | (53.94%) | (52.98%) |
| Splice reads     | 12932255 | 13331670 | 13529914 | 12626596 | 12518596 | 13033129 | 11098215 | 13619747 | 14740020 | 13692940 | 14764461 | 16226699 | 13374057 | 13402013 |
| Splice reads     | (25.18%) | (26.46%) | (25.36%) | (26.10%) | (27.52%) | (25.36%) | (23.59%) | (26.48%) | (30.42%) | (28.83%) | (29.27%) | (30.98%) | (28.94%) | (29.20%) |



Supplementary Table S4 Number of genes in different expression levels

| FPKM     | B_untr            | B_1dmo            | B_7dmo            | B_14dmo           | B_1dpi            | B_7dpi            | B_14dpi           | P_untr            | P_1dmo            | P_7dmo            | P_14dmo           | P_1dpi            | P_7dpi            | P_14dpi           |
|----------|-------------------|-------------------|-------------------|-------------------|-------------------|-------------------|-------------------|-------------------|-------------------|-------------------|-------------------|-------------------|-------------------|-------------------|
| Interval |                   |                   |                   |                   |                   |                   |                   |                   |                   |                   |                   |                   |                   |                   |
| 0-1      | 11563<br>(31.48%) | 13152<br>(35.81%) | 13127<br>(35.74%) | 13226<br>(36.01%) | 12882<br>(35.07%) | 12761<br>(34.74%) | 12533<br>(34.12%) | 11330<br>(30.85%) | 12221<br>(33.28%) | 12573<br>(34.23%) | 12527<br>(34.11%) | 12179<br>(33.16%) | 12399<br>(33.76%) | 12583<br>(34.26%) |
| 1-3      | 4675<br>(12.73%)  | 4556<br>(12.41%)  | 4538<br>(12.36%)  | 4693<br>(12.78%)  | 4586<br>(12.49%)  | 4756<br>(12.95%)  | 4880<br>(13.29%)  | 4705<br>(12.81%)  | 4491<br>(12.23%)  | 4415<br>(12.02%)  | 4490<br>(12.23%)  | 4496<br>(12.24%)  | 4522<br>(12.31%)  | 4449<br>(12.11%)  |
| 3-15     | 11008<br>(29.97%) | 10375<br>(28.25%) | 10481<br>(28.54%) | 10270<br>(27.96%) | 10488<br>(28.56%) | 10281<br>(27.99%) | 10324<br>(28.11%) | 11262<br>(30.66%) | 10925<br>(29.75%) | 10758<br>(29.29%) | 10733<br>(29.22%) | 10937<br>(29.78%) | 10672<br>(29.06%) | 10671<br>(29.05%) |
| 15-60    | 7091<br>(19.31%)  | 6614<br>(18.01%)  | 6633<br>(18.06%)  | 6566<br>(17.88%)  | 6693<br>(18.22%)  | 6688<br>(18.21%)  | 6784<br>(18.47%)  | 7043<br>(19.18%)  | 6991<br>(19.04%)  | 6901<br>(18.79%)  | 6856<br>(18.67%)  | 6951<br>(18.93%)  | 6951<br>(18.93%)  | 6905<br>(18.80%)  |
| >60      | 2390<br>(6.51%)   | 2030<br>(5.53%)   | 1947<br>(5.30%)   | 1972<br>(5.37%)   | 2079<br>(5.66%)   | 2241<br>(6.10%)   | 2206<br>(6.01%)   | 2387<br>(6.50%)   | 2099<br>(5.71%)   | 2080<br>(5.66%)   | 2121<br>(5.77%)   | 2164<br>(5.89%)   | 2183<br>(5.94%)   | 2119<br>(5.77%)   |
| >1       | 25164<br>(68.52%) | 23575<br>(64.19%) | 23600<br>(64.26%) | 23501<br>(63.99%) | 23845<br>(64.93%) | 23966<br>(65.26%) | 24194<br>(65.88%) | 25397<br>(69.15)  | 24506<br>(66.72%) | 24154<br>(65.77%) | 24200<br>(65.89%) | 24548<br>(66.84%) | 24328<br>(66.24%) | 24144<br>(65.74%) |

Supplementary Table S5 Annotation and expression comparison of some DEGs identified in Pahang compared with Brazilian during unchallenged conditions (P\_untr vs. B\_untr)

| Locus_ID             | Chromosome | Start    | End      | Function                           | KEGG                       | Readcount_P_untr | Readcount_B_untr | Log <sub>2</sub> FoldChange |            |            | Significant |
|----------------------|------------|----------|----------|------------------------------------|----------------------------|------------------|------------------|-----------------------------|------------|------------|-------------|
|                      |            |          |          |                                    |                            |                  |                  | (P_untr vs. B_untr)         | Pval       | Padj       |             |
| <u>Ma01_g12160.1</u> | chr01      | 8836059  | 8837402  | bHLH14 transcription factor        | Plant pathogen interaction | 511.641088       | 97.11169051      | 2.3974                      | 1.13E-17   | 2.93E-15   | High        |
| <u>Ma05_g07880.1</u> | chr05      | 5822104  | 5822781  | Calcium-binding protein CML17      | Plant pathogen interaction | 1969.982055      | 3418.687646      | -0.79526                    | 0.0014383  | 0.011461   | Low         |
| <u>Ma08_g00140.1</u> | chr08      | 125536   | 126213   | Calcium-binding protein CML18      | Plant pathogen interaction | 740.3209349      | 298.7596091      | 1.3092                      | 9.36E-07   | 2.39E-05   | High        |
| <u>Ma10_g19740.1</u> | chr10      | 30187358 | 30187843 | Calcium-binding protein CML18      | Plant pathogen interaction | 76.45007374      | 34.12618842      | 1.1636                      | 0.0034989  | 0.023199   | High        |
| <u>Ma04_g19290.1</u> | chr04      | 21892488 | 21892931 | Calcium-binding protein CML19      | Plant pathogen interaction | 721.644534       | 325.6387197      | 1.148                       | 0.0068803  | 0.039842   | High        |
| <u>Ma05_g14170.1</u> | chr05      | 10303061 | 10303501 | Calcium-binding protein CML19      | Plant pathogen interaction | 7.752710168      | 0.421052811      | 4.2026                      | 0.0072741  | 0.041656   | High        |
| <u>Ma09_g26940.1</u> | chr09      | 38071431 | 38072039 | Calcium-binding protein CML19      | Plant pathogen interaction | 205.1852533      | 62.30606339      | 1.7195                      | 2.35E-05   | 0.00038339 | High        |
| <u>Ma09_g04810.1</u> | chr09      | 3103751  | 3104341  | Calcium-binding protein CML27      | Plant pathogen interaction | 79.30391246      | 3.187505507      | 4.6369                      | 2.39E-12   | 2.31E-10   | High        |
| <u>Ma01_g21640.1</u> | chr01      | 21549922 | 21550569 | Calcium-binding protein CML31      | Plant pathogen interaction | 344.1912678      | 125.4817709      | 1.4557                      | 0.00011165 | 0.0014043  | High        |
| <u>Ma09_g24900.1</u> | chr09      | 36515883 | 36516329 | Calcium-binding protein CML7       | Plant pathogen interaction | 2051.738832      | 3409.127417      | -0.73256                    | 0.0026287  | 0.018606   | Low         |
| <u>Ma05_g02560.1</u> | chr05      | 1680854  | 1681645  | Calcium-dependent protein kinase 1 | Plant pathogen interaction | 1.566906134      | 15.89351881      | -3.3424                     | 0.0032606  | 0.021969   | Low         |

|                      |       |          |          |                                           |                            |             |             |          |            |            |      |
|----------------------|-------|----------|----------|-------------------------------------------|----------------------------|-------------|-------------|----------|------------|------------|------|
| <u>Ma05_g29940.1</u> | chr05 | 40476055 | 40479321 | Calcium-dependent protein kinase 17-like  | Plant pathogen interaction | 197.4033794 | 98.4794777  | 1.0033   | 0.0012605  | 0.010297   | High |
| <u>Ma09_g26340.1</u> | chr09 | 37644970 | 37653221 | Calcium-dependent protein kinase 1-like   | Plant pathogen interaction | 1155.873389 | 609.1166558 | 0.92419  | 0.00019578 | 0.0022592  | High |
| <u>Ma02_g12910.1</u> | chr02 | 21507841 | 21514308 | Calcium-dependent protein kinase 26-like  | Plant pathogen interaction | 2119.081815 | 783.2809214 | 1.4358   | 1.55E-06   | 3.70E-05   | High |
| <u>Ma02_g05200.1</u> | chr02 | 16515000 | 16517195 | Calcium-dependent protein kinase 26-like  | Plant pathogen interaction | 254.0722964 | 147.9452527 | 0.78018  | 0.006662   | 0.038882   | High |
| <u>Ma05_g19800.1</u> | chr05 | 29209253 | 29270458 | Calcium-dependent protein kinase 28-like  | Plant pathogen interaction | 64.18567552 | 183.4910741 | -1.5154  | 1.45E-06   | 3.50E-05   | Low  |
| <u>Ma01_g04260.1</u> | chr01 | 2785438  | 2795061  | Calcium-dependent protein kinase 28-like  | Plant pathogen interaction | 843.3434952 | 282.1732224 | 1.5795   | 3.54E-05   | 0.00054063 | High |
| <u>Ma04_g22080.1</u> | chr04 | 24470794 | 24473357 | Calcium-dependent protein kinase 29-like  | Plant pathogen interaction | 652.5866558 | 286.5801537 | 1.1872   | 5.30E-06   | 0.00010643 | High |
| <u>Ma04_g22120.1</u> | chr04 | 24497832 | 24499053 | Calcium-dependent protein kinase 29-like  | Plant pathogen interaction | 201.670315  | 57.58934069 | 1.8081   | 1.81E-08   | 7.24E-07   | High |
| <u>Ma04_g24830.1</u> | chr04 | 26730849 | 26737045 | Calcium-dependent protein kinase 3-like   | Plant pathogen interaction | 91.41659105 | 197.6669215 | -1.1125  | 0.0001532  | 0.0018282  | Low  |
| <u>Ma06_g33600.1</u> | chr06 | 34169077 | 34176774 | Calcium-dependent protein kinase 3-like   | Plant pathogen interaction | 1820.983679 | 847.3834794 | 1.1036   | 3.68E-06   | 7.80E-05   | High |
| <u>Ma09_g05250.1</u> | chr09 | 3383837  | 3389450  | Calcium-dependent protein kinase 3-like   | Plant pathogen interaction | 3675.739784 | 1675.567808 | 1.1334   | 1.01E-06   | 2.53E-05   | High |
| <u>Ma09_g08340.1</u> | chr09 | 5524151  | 5529282  | Calcium-dependent protein kinase SK5-like | Plant pathogen interaction | 2796.925526 | 893.2853608 | 1.6466   | 1.03E-07   | 3.40E-06   | High |
| <u>Ma10_g16000.1</u> | chr10 | 27879162 | 27883534 | Calcium-dependent protein kinase SK5-like | Plant pathogen interaction | 650.3941378 | 1093.249294 | -0.74924 | 0.00344    | 0.022903   | Low  |

|                      |       |          |          |                                               |                            |             |             |         |            |            |      |
|----------------------|-------|----------|----------|-----------------------------------------------|----------------------------|-------------|-------------|---------|------------|------------|------|
| <u>Ma01_g07590.1</u> | chr01 | 5503619  | 5505792  | Calmodulin-2/4-like                           | Plant pathogen interaction | 132.0718355 | 73.01113658 | 0.85513 | 0.0041496  | 0.026593   | High |
| <u>Ma02_g03180.1</u> | chr02 | 14515095 | 14518911 | Calmodulin-2-like                             | Plant pathogen interaction | 814.7112141 | 467.0455079 | 0.80273 | 0.0013747  | 0.011076   | High |
| <u>Ma03_g26590.1</u> | chr03 | 30254035 | 30254838 | Calmodulin-like                               | Plant pathogen interaction | 69.5065605  | 14.38435966 | 2.2726  | 5.99E-07   | 1.64E-05   | High |
| <u>Ma05_g08710.1</u> | chr05 | 6431894  | 6432902  | Calmodulin-like                               | Plant pathogen interaction | 750.4639213 | 186.0087805 | 2.0124  | 2.57E-06   | 5.76E-05   | High |
| <u>Ma01_g21300.1</u> | chr01 | 20951748 | 20953102 | Calmodulin-like protein<br>11                 | Plant pathogen interaction | 579.6714644 | 53.4677908  | 3.4385  | 3.83E-30   | 4.51E-27   | High |
| <u>Ma07_g01400.1</u> | chr07 | 1091324  | 1092381  | Calmodulin-like protein<br>11                 | Plant pathogen interaction | 68.26567039 | 20.0377031  | 1.7684  | 5.08E-05   | 0.00072974 | High |
| <u>Ma09_g08840.1</u> | chr09 | 5877064  | 5877762  | Calmodulin-like protein<br>7                  | Plant pathogen interaction | 379.6982433 | 204.547082  | 0.89242 | 0.0034043  | 0.022722   | High |
| <u>Ma11_g18400.1</u> | chr11 | 23466778 | 23474671 | Chitin elicitor receptor<br>kinase 1-like     | Plant pathogen interaction | 1761.61971  | 948.6695491 | 0.89292 | 0.00019635 | 0.002264   | High |
| <u>Ma06_g09510.1</u> | chr06 | 6659998  | 6663414  | Cyclic nucleotide-gated<br>ion channel 2-like | Plant pathogen interaction | 97.54707782 | 26.52290294 | 1.8789  | 4.35E-06   | 8.99E-05   | High |
| <u>Ma05_g28680.1</u> | chr05 | 39610643 | 39613347 | Cyclic nucleotide-gated<br>ion channel 4-like | Plant pathogen interaction | 727.8682014 | 308.4198736 | 1.2388  | 7.89E-07   | 2.09E-05   | High |
| <u>Ma01_g04010.1</u> | chr01 | 2616623  | 2619348  | Cyclic nucleotide-gated<br>ion channel 4-like | Plant pathogen interaction | 343.768338  | 203.8415286 | 0.75399 | 0.004668   | 0.029233   | High |
| <u>Ma08_g31160.1</u> | chr08 | 42161925 | 42165263 | Disease resistance<br>protein RPM1            | Plant pathogen interaction | 96.04287173 | 21.80105563 | 2.1393  | 0.0044741  | 0.028294   | High |
| <u>Ma04_g35240.1</u> | chr04 | 34114225 | 34117080 | Disease resistance<br>protein RPS5            | Plant pathogen interaction | 1281.307017 | 340.2942396 | 1.9128  | 6.99E-11   | 4.89E-09   | High |

|                      |       |          |          |                                                      |                               |             |             |          |            |            |      |
|----------------------|-------|----------|----------|------------------------------------------------------|-------------------------------|-------------|-------------|----------|------------|------------|------|
| <u>Ma07_g21730.1</u> |       |          |          | Disease resistance<br>RPP8-like protein 2~<br>RPP8L2 | Plant pathogen<br>interaction | 29.72510499 | 2.459069064 | 3.5955   | 1.67E-06   | 3.95E-05   | High |
|                      | chr07 | 29796267 | 29800161 |                                                      |                               |             |             |          |            |            |      |
| <u>Ma07_g21750.1</u> |       |          |          | Disease resistance<br>RPP8-like protein 3~<br>RPP8L2 | Plant pathogen<br>interaction | 24.08965141 | 7.425272831 | 1.6979   | 0.0075641  | 0.042891   | High |
|                      | chr07 | 29827068 | 29829247 |                                                      |                               |             |             |          |            |            |      |
| <u>Ma06_g08310.1</u> |       |          |          | Elongation factor Tu,<br>chloroplastic-like          | Plant pathogen<br>interaction | 177.5475873 | 339.6590863 | -0.93588 | 0.0011888  | 0.009817   | Low  |
|                      | chr06 | 5894297  | 5895742  |                                                      |                               |             |             |          |            |            |      |
| <u>Ma07_g19020.1</u> |       |          |          | Endoplasmic homolog                                  | Plant pathogen<br>interaction | 908.0063982 | 2452.371789 | -1.4334  | 0.00012354 | 0.0015279  | Low  |
|                      | chr07 | 27018816 | 27023913 |                                                      |                               |             |             |          |            |            |      |
| <u>Ma10_g06370.1</u> |       |          |          | Heat shock protein<br>81-1-like                      | Plant pathogen<br>interaction | 10327.25792 | 18231.36887 | -0.81997 | 0.00068642 | 0.0063263  | Low  |
|                      | chr10 | 18933346 | 18936486 |                                                      |                               |             |             |          |            |            |      |
| <u>Ma03_g29390.1</u> |       |          |          | Heat shock protein<br>83-like                        | Plant pathogen<br>interaction | 959.4266262 | 1587.18107  | -0.72622 | 0.0044044  | 0.027967   | Low  |
|                      | chr03 | 32310831 | 32318221 |                                                      |                               |             |             |          |            |            |      |
| <u>Ma09_g23200.1</u> |       |          |          | Heat shock protein<br>83-like                        | Plant pathogen<br>interaction | 354.0610311 | 794.7744001 | -1.1665  | 3.13E-05   | 0.00048641 | Low  |
|                      | chr09 | 35116063 | 35121929 |                                                      |                               |             |             |          |            |            |      |
| <u>Ma08_g02160.1</u> |       |          |          | Hypothetical protein                                 | Plant pathogen<br>interaction | 29.31726846 | 119.0369131 | -2.0216  | 2.30E-08   | 8.99E-07   | Low  |
|                      | chr08 | 1754295  | 1757406  |                                                      |                               |             |             |          |            |            |      |
| <u>Ma10_g02730.1</u> |       |          |          | Mitogen-activated<br>protein kinase 1-like           | Plant pathogen<br>interaction | 437.553908  | 162.4867423 | 1.4291   | 0.00054198 | 0.0052048  | High |
|                      | chr10 | 9341603  | 9349731  |                                                      |                               |             |             |          |            |            |      |
| <u>Ma10_g27400.1</u> |       |          |          | Mitogen-activated<br>protein kinase 2-like           | Plant pathogen<br>interaction | 117.0850009 | 53.29964319 | 1.1354   | 0.00069767 | 0.0064036  | High |
|                      | chr10 | 34714764 | 34718022 |                                                      |                               |             |             |          |            |            |      |
| <u>Ma03_g04840.1</u> |       |          |          | Mitogen-activated<br>protein kinase 5-like           | Plant pathogen<br>interaction | 512.9048077 | 322.2046706 | 0.67071  | 0.005634   | 0.033994   | High |
|                      | chr03 | 3223761  | 3224807  |                                                      |                               |             |             |          |            |            |      |
| <u>Ma04_g05920.1</u> |       |          |          | Mitogen-activated<br>protein kinase 5-like           | Plant pathogen<br>interaction | 443.9409385 | 182.7250081 | 1.2807   | 6.75E-05   | 0.00092913 | High |
|                      | chr04 | 4429644  | 4430737  |                                                      |                               |             |             |          |            |            |      |

|                      |       |          |          |                                                  |                            |             |             |         |            |            |      |
|----------------------|-------|----------|----------|--------------------------------------------------|----------------------------|-------------|-------------|---------|------------|------------|------|
| <u>Ma09_g13150.1</u> | chr09 | 8897283  | 8898341  | Mitogen-activated protein kinase 5-like          | Plant pathogen interaction | 268.7391863 | 110.4482291 | 1.2828  | 7.93E-06   | 0.00015035 | High |
| <u>Ma09_g23300.1</u> | chr09 | 35189203 | 35190192 | Mitogen-activated protein kinase 5-like          | Plant pathogen interaction | 826.3605081 | 243.4605576 | 1.7631  | 5.69E-11   | 4.06E-09   | High |
| <u>Ma09_g21380.1</u> | chr09 | 32368484 | 32369737 | MYC transcription factor                         | Plant pathogen interaction | 20.73694995 | 114.6657466 | -2.4672 | 0.00027922 | 0.0030251  | Low  |
| <u>Ma04_g16760.1</u> | chr04 | 16587449 | 16589190 | MYC transcription factor                         | Plant pathogen interaction | 67.65695123 | 20.8023117  | 1.7015  | 3.50E-05   | 0.00053487 | High |
| <u>Ma09_g05320.1</u> | chr09 | 3436829  | 3441924  | Respiratory burst oxidase homolog protein A-like | Plant pathogen interaction | 990.443748  | 447.1447913 | 1.1473  | 0.0047451  | 0.029606   | High |
| <u>Ma06_g33550.1</u> | chr06 | 34139349 | 34143943 | Respiratory burst oxidase homolog protein A-like | Plant pathogen interaction | 1576.267225 | 820.6871395 | 0.94161 | 0.00015222 | 0.0018179  | High |
| <u>Ma06_g13290.1</u> | chr06 | 9101805  | 9106002  | Respiratory burst oxidase homolog protein B      | Plant pathogen interaction | 20361.58097 | 6556.151291 | 1.6349  | 3.79E-12   | 3.46E-10   | High |
| <u>Ma10_g17360.1</u> | chr10 | 28799994 | 28803354 | Respiratory burst oxidase homolog protein C      | Plant pathogen interaction | 38.91533956 | 9.682954575 | 2.0068  | 0.00026033 | 0.0028585  | High |
| <u>Ma10_g17370.1</u> | chr10 | 28803435 | 28805699 | Respiratory burst oxidase homolog protein C      | Plant pathogen interaction | 190.7911062 | 68.48097527 | 1.4782  | 2.71E-05   | 0.00043046 | High |
| <u>Ma01_g11500.1</u> | chr01 | 8324332  | 8327803  | RPM1-interacting protein 4-like                  | Plant pathogen interaction | 293.4751166 | 147.7627989 | 0.98996 | 0.001399   | 0.011234   | High |
| <u>Ma03_g12680.1</u> | chr03 | 9766669  | 9767713  | RPM1-interacting protein 4-like                  | Plant pathogen interaction | 215.4842527 | 90.73903538 | 1.2478  | 3.25E-05   | 0.00050147 | High |
| <u>Ma06_g01310.1</u> | chr06 | 1052091  | 1055343  | RPM1-interacting protein 4-like                  | Plant pathogen interaction | 155.7161185 | 71.53985006 | 1.1221  | 0.00057992 | 0.0055118  | High |
| <u>Ma11_g08140.1</u> | chr11 | 6495590  | 6498967  | RPM1-interacting protein 4-like                  | Plant pathogen interaction | 640.5810767 | 236.309841  | 1.4387  | 1.03E-06   | 2.58E-05   | High |

|                      |       |          |          |                                              |                               |             |             |         |            |            |      |
|----------------------|-------|----------|----------|----------------------------------------------|-------------------------------|-------------|-------------|---------|------------|------------|------|
| <u>Ma06_g22230.1</u> | chr06 | 17458275 | 17464921 | Serine/threonine-protein<br>kinase PBS1-like | Plant pathogen<br>interaction | 1839.530276 | 1092.200451 | 0.7521  | 0.0014628  | 0.011607   | High |
| <u>Ma09_g01180.1</u> | chr09 | 869660   | 870118   | Serine/threonine-protein<br>kinase PBS1-like | Plant pathogen<br>interaction | 239.7452498 | 89.89298584 | 1.4152  | 1.54E-05   | 0.00026523 | High |
| <u>Ma02_g23650.1</u> | chr02 | 28577419 | 28578748 | TIFY 10A~ TIFY4B                             | Plant pathogen<br>interaction | 2807.135482 | 898.3500858 | 1.6437  | 0.00017853 | 0.0020853  | High |
| <u>Ma07_g21360.1</u> | chr07 | 29492840 | 29493963 | TIFY 10A-like                                | Plant pathogen<br>interaction | 4748.133868 | 2783.296548 | 0.77057 | 0.00108    | 0.009093   | High |
| <u>Ma01_g15260.1</u> | chr01 | 11056753 | 11058649 | TIFY 10B~ TIFY7                              | Plant pathogen<br>interaction | 8084.405176 | 3049.033906 | 1.4068  | 2.59E-09   | 1.28E-07   | High |
| <u>Ma03_g09980.1</u> | chr03 | 7440453  | 7441478  | TIFY 10B-like                                | Plant pathogen<br>interaction | 6665.154079 | 3773.555057 | 0.82071 | 0.00047172 | 0.0046629  | High |
| <u>Ma05_g24500.1</u> | chr05 | 36733367 | 36734468 | TIFY 10B-like                                | Plant pathogen<br>interaction | 1442.982191 | 535.495154  | 1.4301  | 0.0025562  | 0.018191   | High |
| <u>Ma05_g24410.1</u> | chr05 | 36664434 | 36666434 | TIFY 3A-like                                 | Plant pathogen<br>interaction | 1947.748092 | 1132.206609 | 0.78267 | 0.0056531  | 0.03408    | High |
| <u>Ma08_g25400.1</u> | chr08 | 38253457 | 38258395 | TIFY 3B-like                                 | Plant pathogen<br>interaction | 1534.807727 | 781.4947509 | 0.97375 | 0.00011032 | 0.0013927  | High |
| <u>Ma09_g15040.1</u> | chr09 | 10349843 | 10352808 | TIFY 6B                                      | Plant pathogen<br>interaction | 5598.68137  | 3597.959625 | 0.63791 | 0.0039506  | 0.025562   | High |
| <u>Ma07_g12340.1</u> | chr07 | 9233446  | 9235955  | TIFY 6B-like                                 | Plant pathogen<br>interaction | 2954.536811 | 1736.038579 | 0.76713 | 0.0018404  | 0.013957   | High |
| <u>Ma09_g01070.1</u> | chr09 | 801083   | 802396   | TIFY 9~ TIFY6A                               | Plant pathogen<br>interaction | 4011.966351 | 455.0537782 | 3.1402  | 5.55E-13   | 6.20E-11   | High |
| <u>Ma10_g18410.1</u> | chr10 | 29339063 | 29340577 | TIFY 9~ TIFY6B                               | Plant pathogen<br>interaction | 207.4443839 | 15.75313021 | 3.719   | 2.96E-09   | 1.45E-07   | High |

|                      |       |          |          |                                   |                            |             |             |         |           |          |      |
|----------------------|-------|----------|----------|-----------------------------------|----------------------------|-------------|-------------|---------|-----------|----------|------|
| <u>Ma06_g22180.1</u> | chr06 | 17425590 | 17426986 | TIFY5A                            | Plant pathogen interaction | 2483.576081 | 263.1687845 | 3.2384  | 6.74E-15  | 1.11E-12 | High |
| <u>Ma10_g06870.1</u> | chr10 | 20403729 | 20404855 | WRKY transcription factor 22-like | Plant pathogen interaction | 98.5648818  | 2.876285442 | 5.0988  | 0.0024429 | 0.017556 | High |
| <u>Ma06_g34370.1</u> | chr06 | 34630643 | 34632971 | WRKY transcription factor 25      | Plant pathogen interaction | 9928.391412 | 3956.639242 | 1.3273  | 7.41E-09  | 3.30E-07 | High |
| <u>Ma03_g09720.1</u> | chr03 | 7230957  | 7232357  | WRKY transcription factor 26      | Plant pathogen interaction | 56.11448419 | 11.60730165 | 2.2733  | 0.0025009 | 0.017864 | High |
| <u>Ma06_g01150.1</u> | chr06 | 930230   | 932422   | WRKY transcription factor 26      | Plant pathogen interaction | 5434.396725 | 995.4883459 | 2.4486  | 3.15E-09  | 1.54E-07 | High |
| <u>Ma08_g01650.1</u> | chr08 | 1399007  | 1401135  | WRKY transcription factor 26      | Plant pathogen interaction | 557.3467619 | 280.9068597 | 0.98848 | 0.0042424 | 0.027095 | High |
| <u>Ma11_g18140.1</u> | chr11 | 23279101 | 23281141 | WRKY transcription factor 26      | Plant pathogen interaction | 3172.936569 | 407.8388659 | 2.9597  | 2.04E-14  | 3.16E-12 | High |
| <u>Ma10_g03630.1</u> | chr10 | 14237185 | 14242020 | WRKY transcription factor 4       | Plant pathogen interaction | 1664.824986 | 613.4738723 | 1.4403  | 2.83E-06  | 6.23E-05 | High |
| Novel01290           | chr10 | 29961228 | 29964781 | Caltractin                        | Plant pathogen interaction | 100.2536664 | 26.52383504 | 1.9183  | 1.71E-06  | 4.02E-05 | High |



**Supplementary Table S6 Gene expression comparison for enzymes involved in phenylalanine biosynthesis pathway**

| Enzyme         | Genes number | Fold change (B_1dpi vs. B_1dmo) | Fold change (B_7dpi vs. B_7dmo) | Fold change (B_14dpi vs. B_14dmo) | Fold change (P_1dpi vs. P_1dmo) | Fold change (P_7dpi vs. P_7dmo) | Fold change (P_14dpi vs. P_14dmo) |
|----------------|--------------|---------------------------------|---------------------------------|-----------------------------------|---------------------------------|---------------------------------|-----------------------------------|
| PAL            | 8            | 1.38                            | 10.74**                         | 4.83**                            | 1.71                            | 3.50*                           | 1.59                              |
| C4H_1          | 3            | 1.77                            | 171.34**                        | 22.35**                           | 5.84**                          | 8.07**                          | 2.78*                             |
| C4H_2          | 4            | 1.47                            | 4.38**                          | 4.09**                            | 1.75                            | 2.10*                           | 1.47                              |
| 4CL            | 6            | 0.98                            | 2.74*                           | 1.86                              | 1.24                            | 1.83                            | 1.18                              |
| CHS            | 18           | 1.18                            | 3.83*                           | 5.07**                            | 1.00                            | 1.57                            | 1.37                              |
| CHI (CHIL5)    | 1            | 0.85                            | 0.24 <sup>++</sup>              | 0.43 <sup>+</sup>                 | 0.74                            | 1.16                            | 0.36 <sup>+</sup>                 |
| CHI_1          | 1            | 1.25                            | 0.68                            | 0.81                              | 0.94                            | 0.95                            | 0.42 <sup>+</sup>                 |
| CCR            | 3            | 1.08                            | 0.62                            | 0.13 <sup>++</sup>                | 1.18                            | 0.66                            | 0.72                              |
| CAD_ Class I   | 2            | 0.89                            | 1.34                            | 0.85                              | 0.96                            | 0.87                            | 0.87                              |
| CAD_ Class II  | 2            | 1.22                            | 1.27                            | 1.63                              | 1.10                            | 1.43                            | 1.35                              |
| CAD_ Class III | 3            | 1.42                            | 7.98**                          | 8.58**                            | 1.65                            | 2.38*                           | 1.51                              |
| CAD_ Class IV  | 3            | 1.00                            | 1.19                            | 1.36                              | 0.81                            | 0.86                            | 0.89                              |
| POD            | 109          | 1.28                            | 5.91**                          | 3.20*                             | 1.32                            | 2.16*                           | 0.90                              |
| HCT            | 15           | 1.05                            | 4.96**                          | 3.65*                             | 1.22                            | 2.08*                           | 1.11                              |
| C3'H           | 1            | 1.35                            | 3.30*                           | 3.39*                             | 1.28                            | 1.69                            | 0.96                              |
| CCoAOMT1       | 7            | 1.11                            | 1.83                            | 1.47                              | 1.23                            | 1.28                            | 1.06                              |

Note: The fold change between respective dpi/dmo FPKM values for Brazilian/Pahang samples. \*\* Fold change higher than 4 and \* fold change between 2 and 4, which indicate clearly up-regulated and moderately up-regulated, respectively; <sup>++</sup> fold change lower than 0.25 and <sup>+</sup> fold change between 0.25 and 0.5, which indicate clearly down-regulated and moderately down-regulated, respectively.

**Supplementary Table S7 Genes name of enzymes involved in phenylalanine biosynthesis**

| Enzyme         | Gene name                                                                                                                                                                                                                                                                                                                                                                                                                                                                                                                                                                                                                                                                                                                                                                                                                                                                                                                                                                                                                                                                                    |
|----------------|----------------------------------------------------------------------------------------------------------------------------------------------------------------------------------------------------------------------------------------------------------------------------------------------------------------------------------------------------------------------------------------------------------------------------------------------------------------------------------------------------------------------------------------------------------------------------------------------------------------------------------------------------------------------------------------------------------------------------------------------------------------------------------------------------------------------------------------------------------------------------------------------------------------------------------------------------------------------------------------------------------------------------------------------------------------------------------------------|
| PAL            | Ma05_g20900, Ma11_g14940, Ma11_g21180 , Ma08_g14940, Ma05_g03720, Ma02_g00760, Ma01_g04420 and Ma09_g15390.                                                                                                                                                                                                                                                                                                                                                                                                                                                                                                                                                                                                                                                                                                                                                                                                                                                                                                                                                                                  |
| C4H_1          | Ma03_g05380, Ma03_g05400 and Ma09_g13580.                                                                                                                                                                                                                                                                                                                                                                                                                                                                                                                                                                                                                                                                                                                                                                                                                                                                                                                                                                                                                                                    |
| C4H_2          | Ma07_g19640, Ma10_g13130, Ma06_g10250 and Ma09_g04770.                                                                                                                                                                                                                                                                                                                                                                                                                                                                                                                                                                                                                                                                                                                                                                                                                                                                                                                                                                                                                                       |
| 4CL            | Ma03_g13320, Ma04_g05890, Ma07_g05170, Ma01_g18930, Ma04_g12600 and Ma09_g23330.                                                                                                                                                                                                                                                                                                                                                                                                                                                                                                                                                                                                                                                                                                                                                                                                                                                                                                                                                                                                             |
| CHS            | Ma10_g20560, Ma10_g20570, Ma10_g20580, Ma10_g20590, Ma10_g20600, Ma02_g16120, Ma02_g24860, Ma03_g01020, Ma03_g23650, Ma05_g32080, Ma06_g09770, Ma06_g09780, Ma06_g10570, Ma06_g12370, Ma06_g17870, Ma10_g12390, Ma10_g12450 and Ma11_g24610.                                                                                                                                                                                                                                                                                                                                                                                                                                                                                                                                                                                                                                                                                                                                                                                                                                                 |
| CHI (CHIL5)    | Ma11_g21950.                                                                                                                                                                                                                                                                                                                                                                                                                                                                                                                                                                                                                                                                                                                                                                                                                                                                                                                                                                                                                                                                                 |
| CHI_1          | Ma04_g17380.                                                                                                                                                                                                                                                                                                                                                                                                                                                                                                                                                                                                                                                                                                                                                                                                                                                                                                                                                                                                                                                                                 |
| CCR            | Ma11_g07890, Ma05_g04220 and Ma06_g00250.                                                                                                                                                                                                                                                                                                                                                                                                                                                                                                                                                                                                                                                                                                                                                                                                                                                                                                                                                                                                                                                    |
| CAD_ Class I   | Ma04_g12960 and Ma04_g06170.                                                                                                                                                                                                                                                                                                                                                                                                                                                                                                                                                                                                                                                                                                                                                                                                                                                                                                                                                                                                                                                                 |
| CAD_ Class II  | Ma07_g07170 and Ma09_g2788.                                                                                                                                                                                                                                                                                                                                                                                                                                                                                                                                                                                                                                                                                                                                                                                                                                                                                                                                                                                                                                                                  |
| CAD_ Class III | Ma09_g31400, Ma00_g03560 and Ma05_g11250.                                                                                                                                                                                                                                                                                                                                                                                                                                                                                                                                                                                                                                                                                                                                                                                                                                                                                                                                                                                                                                                    |
| CAD_ Class IV  | Ma04_g20820, Ma04_g33020 and Ma10_g17990.                                                                                                                                                                                                                                                                                                                                                                                                                                                                                                                                                                                                                                                                                                                                                                                                                                                                                                                                                                                                                                                    |
| POD            | Ma00_g02230, Ma00_g03690, Ma01_g03820, Ma01_g03830, Ma01_g15470, Ma01_g16980, Ma01_g21440, Ma01_g21520, Ma02_g04360, Ma02_g04920, Ma02_g04930, Ma02_g05430, Ma02_g06740, Ma02_g17250, Ma02_g17260, Ma02_g17270, Ma02_g17280, Ma02_g22420, Ma02_g22430, Ma02_g22440, Ma02_g22450, Ma02_g23580, Ma03_g02760, Ma03_g03390, Ma03_g03420, Ma03_g04630, Ma03_g06220, Ma03_g10060, Ma03_g13910, Ma03_g18370, Ma03_g21640, Ma04_g02030, Ma04_g04170, Ma04_g05290, Ma04_g06420, Ma04_g13290, Ma04_g16270, Ma04_g16700, Ma04_g16720, Ma04_g19300, Ma04_g30470, Ma04_g34410, Ma05_g15650, Ma05_g15710, Ma05_g22740, Ma05_g27300, Ma05_g27310, Ma05_g31950, Ma06_g00650, Ma06_g00660, Ma06_g02220, Ma06_g07210, Ma06_g10290, Ma06_g12910, Ma06_g12920, Ma06_g16060, Ma06_g16100, Ma06_g16130, Ma06_g19750, Ma06_g23670, Ma06_g23680, Ma06_g24110, Ma06_g32140, Ma07_g02740, Ma07_g04750, Ma07_g05870, Ma07_g05880, Ma07_g09210, Ma07_g09220, Ma07_g11120, Ma07_g23680, Ma07_g23690, Ma07_g25110, Ma08_g10630, Ma08_g12130, Ma08_g12140, Ma08_g12150, Ma08_g26600, Ma08_g26830, Ma08_g32520, Ma09_g04700, |

---

|          |                                                                                                                                                                                                                                                                                                                                                                                |
|----------|--------------------------------------------------------------------------------------------------------------------------------------------------------------------------------------------------------------------------------------------------------------------------------------------------------------------------------------------------------------------------------|
|          | Ma09_g11490, Ma09_g11510, Ma09_g17630, Ma09_g24310, Ma09_g28800, Ma09_g29300, Ma09_g30120, Ma09_g30760, Ma09_g31450, Ma10_g01510, Ma10_g03120, Ma10_g05180, Ma10_g05350, Ma10_g07300, Ma10_g11670, Ma10_g14320, Ma10_g15940, Ma10_g25840, Ma10_g27800, Ma10_g27810, Ma10_g27820, Ma11_g02610, Ma11_g02620, Ma11_g02630, Ma11_g04630, Ma11_g19280, Ma11_g22010 and Ma11_g23900. |
| HCT      | Ma04_g02000, Ma05_g04310, Ma10_g23880, Ma07_g16250, Ma07_g16240, Ma06_g03660, Ma04_g21340, Ma04_g00240, Ma02_g12390, Ma08_g03070, Ma08_g03090, Ma08_g03100, Ma08_g03110, Ma08_g03120 and Ma08_g20200.                                                                                                                                                                          |
| C3'H     | Ma08_g24760.                                                                                                                                                                                                                                                                                                                                                                   |
| CCoAOMT1 | Ma10_g03210, Ma10_g03220, Ma03_g06130, Ma06_g38330, Ma08_g19800, Ma09_g25700 and Ma08_g24230.                                                                                                                                                                                                                                                                                  |

---

**Supplementary Table S8 Annotation of DEGs identified in Pahang infected samples compared with mock samples (P\_dpi vs. P\_dmo)**

| Identification      | DEGs_id     | Annotation                                | Species                             |
|---------------------|-------------|-------------------------------------------|-------------------------------------|
| P_1dpi vs. P_1dmo   | Ma02_g12980 | GDSL esterase/lipase                      | <i>Arabidopsis thaliana</i>         |
|                     | Ma03_g01020 | Phenylpropanoylacetyl-CoA synthase        | <i>Curcuma longa</i>                |
|                     | Ma03_g03840 | Aspartic proteinase nepenthesin-2         | <i>Nepenthes gracilis</i>           |
|                     | Ma03_g08140 | Pathogenesis-related protein 1            | <i>Asparagus officinalis</i>        |
|                     | Ma03_g11650 | Protein ASPARTIC PROTEASE IN GUARD CELL 2 | <i>Arabidopsis thaliana</i>         |
|                     | Ma05_g26350 | Cytochrome P450                           | <i>Arabidopsis thaliana</i>         |
|                     | Ma06_g10290 | Peroxidase 4                              | <i>Vitis vinifera</i>               |
|                     | Ma08_g28490 | Acidic endochitinase                      | <i>Vitis vinifera</i>               |
|                     | Ma08_g34150 | Pathogenesis-related protein 1            | <i>Asparagus officinalis</i>        |
|                     | Ma08_g34160 | Pathogenesis-related protein 1            | <i>Asparagus officinalis</i>        |
|                     | Ma08_g34740 | Polyphenol oxidase, chloroplastic         | <i>Malus domestica</i>              |
| P_7dpi vs. P_7dmo   | Ma02_g23450 | 3-ketoacyl-CoA synthase 6                 | <i>Arabidopsis thaliana</i>         |
|                     | Ma04_g13440 | Unknown                                   |                                     |
| P_14dpi vs. P_14dmo | Ma03_g01410 | Sphinganine C(4)-monooxygenase 2          | <i>Arabidopsis thaliana</i>         |
|                     | Ma05_g13280 | Putative glucuronosyltransferase          | <i>Arabidopsis thaliana</i>         |
|                     | Ma05_g17850 | Chitinase 6                               | <i>Oryza sativa subsp. japonica</i> |
|                     | Ma06_g23500 | Probable WRKY transcription factor 23     | <i>Arabidopsis thaliana</i>         |
