# Supplementary material for: Transcriptomic analysis of resistant and susceptible banana corms in response to infection by Fusarium oxysporum f. sp. cubense tropical race 4
Source: PubMed Central journal article supplement (PMC6546912; doi:10.1038/s41598-019-44637-x), 2019-06-03
Supplement: 41598_2019_44637_MOESM2_ESM.pdf [file 41598_2019_44637_MOESM2_ESM.pdf]

**Transcriptomic analysis of resistant and susceptible banana corms  
in response to infection by *Fusarium oxysporum* f. sp. *cubense*  
tropical race 4**

Lei Zhang<sup>1, 2, 6</sup>, Alberto Cenci<sup>4</sup>, Mathieu Rouard<sup>4</sup>, Dong Zhang<sup>5</sup>, Yunyue Wang<sup>1,\*</sup>, Weihua Tang<sup>5,\*</sup>  
& Si-Jun Zheng<sup>2, 3,\*</sup>

<sup>1</sup> State Key Laboratory for Conservation and Utilization of Bio-Resources in Yunnan, Ministry of Education Key Laboratory of Agriculture Biodiversity for Plant Disease Management, Yunnan Agricultural University, Kunming, 650201, China. <sup>2</sup> Agricultural Environment and Resources Institute, Yunnan Academy of Agricultural Sciences, Kunming, 650205, China. <sup>3</sup> Bioversity International, 2238 Beijing Road, Kunming 650205, Yunnan, China. <sup>4</sup> Bioversity International, Parc Scientifique Agropolis II, 34397 Montpellier, Cedex 5 France. <sup>5</sup> National Key Laboratory of Plant Molecular Genetics, CAS Center for Excellence in Molecular Plant Sciences, Institute of Plant Physiology and Ecology, Shanghai Institutes for Biological Sciences, Chinese Academy of Sciences, Shanghai 200032, China. <sup>6</sup> Dehong Agricultural Technology Extension Center, Mangshi, 678400, China. \*Correspondence and requests for materials should be addressed to S.-J.Z. (email: s.zheng@cgiar.org), W.-H.T. (whtang@sibs.ac.cn) & Y.-Y.W. (1371209436@qq.com)

## The most enriched pathway terms

Statistic method: hypergeometric test

FDR correction method: Benjamini and Hochberg

| Term                                       | Sample number | Background number | P-value          | Corrected P-value | UniGenes    | KO          | Entrez ID | Ensembl ID | Gene name |
|--------------------------------------------|---------------|-------------------|------------------|-------------------|-------------|-------------|-----------|------------|-----------|
| <a href="#">Plant-pathogen interaction</a> | 85            | 130               | 6.3356598576e-07 | 7.53943523055e-05 | Ma11_g08140 | osa:4334782 | 4334782   |            |           |
|                                            |               |                   |                  |                   | Ma07_g01400 | osa:4344344 | 4344344   |            |           |
|                                            |               |                   |                  |                   | Ma06_g09510 | osa:4334172 | 4334172   |            |           |
|                                            |               |                   |                  |                   | Ma09_g13150 | osa:4340367 | 4340367   |            |           |
|                                            |               |                   |                  |                   | Ma10_g17360 | osa:4326027 | 4326027   |            |           |
|                                            |               |                   |                  |                   | Ma10_g16000 | osa:4349899 | 4349899   |            |           |
|                                            |               |                   |                  |                   | Ma04_g05920 | osa:4330957 | 4330957   |            |           |
|                                            |               |                   |                  |                   | Ma08_g01650 | osa:4327518 | 4327518   |            |           |
|                                            |               |                   |                  |                   | Ma09_g21380 | osa:4349484 | 4349484   |            |           |
|                                            |               |                   |                  |                   | Ma05_g28680 | osa:4339240 | 4339240   |            |           |
|                                            |               |                   |                  |                   | Ma04_g22120 | osa:4343373 | 4343373   |            |           |
|                                            |               |                   |                  |                   | Ma07_g12340 | osa:4347000 | 4347000   |            |           |
|                                            |               |                   |                  |                   | Ma04_g22080 | osa:4343373 | 4343373   |            |           |
|                                            |               |                   |                  |                   | Ma10_g27400 | osa:4340126 | 4340126   |            |           |
|                                            |               |                   |                  |                   | Ma03_g04840 | osa:4340367 | 4340367   |            |           |
|                                            |               |                   |                  |                   | Ma07_g21730 | osa:4342596 | 4342596   |            |           |
|                                            |               |                   |                  |                   | Ma06_g22180 | osa:4335698 | 4335698   |            |           |
|                                            |               |                   |                  |                   | Ma06_g01150 | osa:4327518 | 4327518   |            |           |
|                                            |               |                   |                  |                   | Ma09_g23300 | osa:4330957 | 4330957   |            |           |
|                                            |               |                   |                  |                   | Ma01_g04010 | osa:4339240 | 4339240   |            |           |
|                                            |               |                   |                  |                   | Ma04_g24830 | osa:4339751 | 4339751   |            |           |
|                                            |               |                   |                  |                   | Ma10_g06870 | osa:4328953 | 4328953   |            |           |
|                                            |               |                   |                  |                   | Ma09_g05320 | osa:4339397 | 4339397   |            |           |
|                                            |               |                   |                  |                   | Ma02_g03180 | osa:4339172 | 4339172   |            |           |
|                                            |               |                   |                  |                   | Ma03_g09980 | osa:4333065 | 4333065   |            |           |
|                                            |               |                   |                  |                   | Ma05_g19800 | osa:4328155 | 4328155   |            |           |
|                                            |               |                   |                  |                   | Ma02_g23650 | osa:4343899 | 4343899   |            |           |
|                                            |               |                   |                  |                   | Ma08_g31160 | osa:4348062 | 4348062   |            |           |
|                                            |               |                   |                  |                   | Ma09_g15040 | osa:4347000 | 4347000   |            |           |
|                                            |               |                   |                  |                   | Ma09_g24900 | osa:4344525 | 4344525   |            |           |
|                                            |               |                   |                  |                   | Ma07_g21750 | osa:4342596 | 4342596   |            |           |
|                                            |               |                   |                  |                   | Ma05_g24410 | osa:4337240 | 4337240   |            |           |
|                                            |               |                   |                  |                   | Novel01290  | osa:4343922 | 4343922   |            |           |
|                                            |               |                   |                  |                   | Ma01_g15260 | osa:4343899 | 4343899   |            |           |
|                                            |               |                   |                  |                   | Ma06_g33550 | osa:4339397 | 4339397   |            |           |
|                                            |               |                   |                  |                   | Ma09_g01180 | osa:4329463 | 4329463   |            |           |
|                                            |               |                   |                  |                   | Ma09_g08840 | osa:4336258 | 4336258   |            |           |
|                                            |               |                   |                  |                   | Ma05_g07880 | osa:4325693 | 4325693   |            |           |
|                                            |               |                   |                  |                   | Ma08_g25400 | osa:4337240 | 4337240   |            |           |
|                                            |               |                   |                  |                   | Ma09_g23200 | osa:4345893 | 4345893   |            |           |
|                                            |               |                   |                  |                   | Ma06_g13290 | osa:4326027 | 4326027   |            |           |
|                                            |               |                   |                  |                   | Ma10_g18410 | osa:4335698 | 4335698   |            |           |
|                                            |               |                   |                  |                   | Ma09_g26340 | osa:4342456 | 4342456   |            |           |
|                                            |               |                   |                  |                   | Ma03_g09720 | osa:4327518 | 4327518   |            |           |
|                                            |               |                   |                  |                   | Ma01_g21300 | osa:4344344 | 4344344   |            |           |
|                                            |               |                   |                  |                   | Ma09_g04810 | osa:4332731 | 4332731   |            |           |
|                                            |               |                   |                  |                   | Ma05_g08710 | osa:4344344 | 4344344   |            |           |
|                                            |               |                   |                  |                   | Ma06_g08310 | osa:9270837 | 9270837   |            |           |
|                                            |               |                   |                  |                   | Ma10_g06370 | osa:9267802 | 9267802   |            |           |
|                                            |               |                   |                  |                   | Ma04_g09630 | osa:4337240 | 4337240   |            |           |
|                                            |               |                   |                  |                   | Ma10_g17370 | osa:4326027 | 4326027   |            |           |
|                                            |               |                   |                  |                   | Ma08_g00140 | osa:4325762 | 4325762   |            |           |
|                                            |               |                   |                  |                   | Ma10_g02730 | osa:4333845 | 4333845   |            |           |
|                                            |               |                   |                  |                   | Ma05_g24500 | osa:4333065 | 4333065   |            |           |
|                                            |               |                   |                  |                   | Ma01_g04260 | osa:4328155 | 4328155   |            |           |
|                                            |               |                   |                  |                   | Ma04_g35240 | osa:4325862 | 4325862   |            |           |
|                                            |               |                   |                  |                   | Ma03_g12680 | osa:4334782 | 4334782   |            |           |
|                                            |               |                   |                  |                   | Ma05_g02560 | osa:4352234 | 4352234   |            |           |
|                                            |               |                   |                  |                   | Ma06_g22230 | osa:4329463 | 4329463   |            |           |
|                                            |               |                   |                  |                   | Ma09_g01070 | osa:4335698 | 4335698   |            |           |
|                                            |               |                   |                  |                   | Ma09_g08340 | osa:4349899 | 4349899   |            |           |
|                                            |               |                   |                  |                   | Ma10_g03630 | osa:4327518 | 4327518   |            |           |
| Ma05_g14170                                | osa:4325408   | 4325408           |                  |                   |             |             |           |            |           |
| Ma03_g29390                                | osa:4345893   | 4345893           |                  |                   |             |             |           |            |           |
| Ma03_g26590                                | osa:4344344   | 4344344           |                  |                   |             |             |           |            |           |
| Ma09_g05250                                | osa:4339751   | 4339751           |                  |                   |             |             |           |            |           |
| Ma04_g19290                                | osa:4325408   | 4325408           |                  |                   |             |             |           |            |           |
| Ma10_g19740                                | osa:4325762   | 4325762           |                  |                   |             |             |           |            |           |
| Ma02_g05200                                | osa:4330351   | 4330351           |                  |                   |             |             |           |            |           |

|                                                   |    |     |                   |                 |             |             |         |  |  |
|---------------------------------------------------|----|-----|-------------------|-----------------|-------------|-------------|---------|--|--|
|                                                   |    |     |                   |                 | Ma11_g18140 | osa:4327518 | 4327518 |  |  |
|                                                   |    |     |                   |                 | Ma11_g18400 | osa:4346173 | 4346173 |  |  |
|                                                   |    |     |                   |                 | Ma01_g07590 | osa:4326903 | 4326903 |  |  |
|                                                   |    |     |                   |                 | Ma08_g02160 | osa:4338955 | 4338955 |  |  |
|                                                   |    |     |                   |                 | Ma05_g29940 | osa:4327560 | 4327560 |  |  |
|                                                   |    |     |                   |                 | Ma04_g16760 | osa:4349484 | 4349484 |  |  |
|                                                   |    |     |                   |                 | Ma06_g33600 | osa:4339751 | 4339751 |  |  |
|                                                   |    |     |                   |                 | Ma01_g11500 | osa:4334782 | 4334782 |  |  |
|                                                   |    |     |                   |                 | Ma06_g01310 | osa:4334782 | 4334782 |  |  |
|                                                   |    |     |                   |                 | Ma07_g21360 | osa:4333065 | 4333065 |  |  |
|                                                   |    |     |                   |                 | Ma02_g12910 | osa:4330351 | 4330351 |  |  |
|                                                   |    |     |                   |                 | Ma09_g26940 | osa:4334250 | 4334250 |  |  |
|                                                   |    |     |                   |                 | Ma01_g12160 | osa:4349484 | 4349484 |  |  |
|                                                   |    |     |                   |                 | Ma07_g19020 | osa:4342077 | 4342077 |  |  |
|                                                   |    |     |                   |                 | Ma06_g34370 | osa:4327518 | 4327518 |  |  |
|                                                   |    |     |                   |                 | Ma01_g21640 | osa:4325408 | 4325408 |  |  |
|                                                   |    |     |                   |                 | Ma04_g20370 | osa:4334864 | 4334864 |  |  |
|                                                   |    |     |                   |                 | Ma09_g21380 | osa:4349484 | 4349484 |  |  |
|                                                   |    |     |                   |                 | Ma11_g22080 | osa:4332548 | 4332548 |  |  |
|                                                   |    |     |                   |                 | Ma09_g15040 | osa:4347000 | 4347000 |  |  |
|                                                   |    |     |                   |                 | Ma04_g02770 | osa:4325895 | 4325895 |  |  |
|                                                   |    |     |                   |                 | Ma02_g18450 | osa:4327315 | 4327315 |  |  |
|                                                   |    |     |                   |                 | Ma09_g16910 | osa:4332697 | 4332697 |  |  |
|                                                   |    |     |                   |                 | Ma07_g09020 | osa:4327315 | 4327315 |  |  |
|                                                   |    |     |                   |                 | Ma02_g14470 | osa:4352722 | 4352722 |  |  |
|                                                   |    |     |                   |                 | Ma03_g06930 | osa:4347257 | 4347257 |  |  |
|                                                   |    |     |                   |                 | Ma07_g25420 | osa:4339797 | 4339797 |  |  |
|                                                   |    |     |                   |                 | Ma09_g01070 | osa:4335698 | 4335698 |  |  |
|                                                   |    |     |                   |                 | Ma02_g08720 | osa:4349800 | 4349800 |  |  |
|                                                   |    |     |                   |                 | Ma06_g35720 | osa:4324749 | 4324749 |  |  |
|                                                   |    |     |                   |                 | Ma07_g09130 | osa:9270643 | 9270643 |  |  |
|                                                   |    |     |                   |                 | Ma05_g24410 | osa:4337240 | 4337240 |  |  |
|                                                   |    |     |                   |                 | Ma06_g17510 | osa:4339158 | 4339158 |  |  |
|                                                   |    |     |                   |                 | Ma01_g11950 | osa:4349090 | 4349090 |  |  |
|                                                   |    |     |                   |                 | Ma01_g04450 | osa:9271447 | 9271447 |  |  |
|                                                   |    |     |                   |                 | Ma07_g13570 | osa:4339365 | 4339365 |  |  |
|                                                   |    |     |                   |                 | Ma05_g11100 | osa:4329252 | 4329252 |  |  |
|                                                   |    |     |                   |                 | Ma01_g14850 | osa:4333017 | 4333017 |  |  |
|                                                   |    |     |                   |                 | Ma02_g23650 | osa:4343899 | 4343899 |  |  |
|                                                   |    |     |                   |                 | Ma02_g00520 | osa:4344349 | 4344349 |  |  |
|                                                   |    |     |                   |                 | Ma10_g18410 | osa:4335698 | 4335698 |  |  |
|                                                   |    |     |                   |                 | Ma08_g25810 | osa:4339756 | 4339756 |  |  |
|                                                   |    |     |                   |                 | Ma01_g15260 | osa:4343899 | 4343899 |  |  |
|                                                   |    |     |                   |                 | Ma08_g22320 | osa:4332697 | 4332697 |  |  |
|                                                   |    |     |                   |                 | Ma04_g09630 | osa:4337240 | 4337240 |  |  |
|                                                   |    |     |                   |                 | Ma05_g24500 | osa:4333065 | 4333065 |  |  |
|                                                   |    |     |                   |                 | Ma08_g22800 | osa:4349742 | 4349742 |  |  |
|                                                   |    |     |                   |                 | Ma11_g22370 | osa:4327465 | 4327465 |  |  |
|                                                   |    |     |                   |                 | Ma06_g30730 | osa:4335937 | 4335937 |  |  |
|                                                   |    |     |                   |                 | Ma07_g10790 | osa:4325895 | 4325895 |  |  |
|                                                   |    |     |                   |                 | Ma11_g16000 | osa:4336520 | 4336520 |  |  |
|                                                   |    |     |                   |                 | Ma02_g24350 | osa:4333860 | 4333860 |  |  |
|                                                   |    |     |                   |                 | Ma07_g21350 | osa:4347154 | 4347154 |  |  |
|                                                   |    |     |                   |                 | Ma06_g14500 | osa:4335877 | 4335877 |  |  |
|                                                   |    |     |                   |                 | Ma05_g31380 | osa:4327465 | 4327465 |  |  |
|                                                   |    |     |                   |                 | Ma03_g31440 | osa:4343785 | 4343785 |  |  |
|                                                   |    |     |                   |                 | Ma10_g21790 | osa:4328916 | 4328916 |  |  |
|                                                   |    |     |                   |                 | Ma03_g31200 | osa:4343719 | 4343719 |  |  |
|                                                   |    |     |                   |                 | Ma04_g16760 | osa:4349484 | 4349484 |  |  |
|                                                   |    |     |                   |                 | Ma01_g12160 | osa:4349484 | 4349484 |  |  |
|                                                   |    |     |                   |                 | Ma05_g10960 | osa:4327590 | 4327590 |  |  |
|                                                   |    |     |                   |                 | Ma11_g20770 | osa:4331518 | 4331518 |  |  |
|                                                   |    |     |                   |                 | Ma04_g39240 | osa:4343785 | 4343785 |  |  |
|                                                   |    |     |                   |                 | Ma03_g09980 | osa:4333065 | 4333065 |  |  |
|                                                   |    |     |                   |                 | Ma05_g05370 | osa:4345817 | 4345817 |  |  |
|                                                   |    |     |                   |                 | Ma02_g13450 | osa:4332697 | 4332697 |  |  |
|                                                   |    |     |                   |                 | Ma08_g33950 | osa:4337780 | 4337780 |  |  |
|                                                   |    |     |                   |                 | Ma08_g25400 | osa:4337240 | 4337240 |  |  |
|                                                   |    |     |                   |                 | Ma04_g12040 | osa:4334864 | 4334864 |  |  |
|                                                   |    |     |                   |                 | Ma06_g32210 | osa:4347257 | 4347257 |  |  |
|                                                   |    |     |                   |                 | Ma09_g04540 | osa:4332548 | 4332548 |  |  |
|                                                   |    |     |                   |                 | Ma08_g17700 | osa:4333860 | 4333860 |  |  |
|                                                   |    |     |                   |                 | Ma08_g05340 | osa:4327315 | 4327315 |  |  |
|                                                   |    |     |                   |                 | Ma05_g29830 | osa:4338764 | 4338764 |  |  |
|                                                   |    |     |                   |                 | Ma07_g25770 | osa:4329672 | 4329672 |  |  |
|                                                   |    |     |                   |                 | Ma02_g13090 | osa:4327590 | 4327590 |  |  |
|                                                   |    |     |                   |                 | Ma07_g27910 | osa:4343785 | 4343785 |  |  |
|                                                   |    |     |                   |                 | Ma11_g10390 | osa:4335877 | 4335877 |  |  |
|                                                   |    |     |                   |                 | Ma04_g31240 | osa:4349090 | 4349090 |  |  |
|                                                   |    |     |                   |                 | Ma09_g14850 | osa:4330855 | 4330855 |  |  |
|                                                   |    |     |                   |                 | Ma03_g10900 | osa:4347439 | 4347439 |  |  |
|                                                   |    |     |                   |                 | Ma09_g27550 | osa:4331061 | 4331061 |  |  |
|                                                   |    |     |                   |                 | Ma11_g24520 | osa:4338933 | 4338933 |  |  |
|                                                   |    |     |                   |                 | Ma05_g07890 | osa:4349742 | 4349742 |  |  |
|                                                   |    |     |                   |                 | Ma10_g19630 | osa:4333860 | 4333860 |  |  |
|                                                   |    |     |                   |                 | Ma06_g34440 | osa:4332548 | 4332548 |  |  |
| <a href="#">Plant hormone signal transduction</a> | 92 | 184 | 0.000520854457399 | 0.0256333619695 |             |             |         |  |  |

|                                       |     |     |                   |                 |             |             |         |  |  |
|---------------------------------------|-----|-----|-------------------|-----------------|-------------|-------------|---------|--|--|
|                                       |     |     |                   |                 | Ma10_g18590 | osa:4343785 | 4343785 |  |  |
|                                       |     |     |                   |                 | Ma07_g12340 | osa:4347000 | 4347000 |  |  |
|                                       |     |     |                   |                 | Ma07_g21360 | osa:4333065 | 4333065 |  |  |
|                                       |     |     |                   |                 | Ma08_g12900 | osa:4335058 | 4335058 |  |  |
|                                       |     |     |                   |                 | Ma06_g22180 | osa:4335698 | 4335698 |  |  |
|                                       |     |     |                   |                 | Ma03_g27100 | osa:4327315 | 4327315 |  |  |
|                                       |     |     |                   |                 | Ma09_g26000 | osa:4352721 | 4352721 |  |  |
|                                       |     |     |                   |                 | Ma04_g15670 | osa:4339756 | 4339756 |  |  |
|                                       |     |     |                   |                 | Ma10_g26870 | osa:4328647 | 4328647 |  |  |
|                                       |     |     |                   |                 | Ma04_g08500 | osa:4339756 | 4339756 |  |  |
|                                       |     |     |                   |                 | Ma09_g27730 | osa:4347257 | 4347257 |  |  |
|                                       |     |     |                   |                 | Ma11_g23440 | osa:4332697 | 4332697 |  |  |
|                                       |     |     |                   |                 | Ma11_g06370 | osa:4352722 | 4352722 |  |  |
|                                       |     |     |                   |                 | Ma04_g10570 | osa:4325895 | 4325895 |  |  |
|                                       |     |     |                   |                 | Ma04_g27640 | osa:4352722 | 4352722 |  |  |
|                                       |     |     |                   |                 | Ma08_g02160 | osa:4338955 | 4338955 |  |  |
|                                       |     |     |                   |                 | Ma05_g15140 | osa:4349090 | 4349090 |  |  |
|                                       |     |     |                   |                 | Ma05_g22010 | osa:4334864 | 4334864 |  |  |
|                                       |     |     |                   |                 | Ma04_g38570 | osa:4325503 | 4325503 |  |  |
|                                       |     |     |                   |                 | Ma05_g24620 | osa:4328277 | 4328277 |  |  |
|                                       |     |     |                   |                 | Ma02_g02830 | osa:4325078 | 4325078 |  |  |
|                                       |     |     |                   |                 | Ma06_g37840 | osa:4324691 | 4324691 |  |  |
|                                       |     |     |                   |                 | Ma08_g33280 | osa:4325067 | 4325067 |  |  |
|                                       |     |     |                   |                 | Ma10_g17260 | osa:4343523 | 4343523 |  |  |
|                                       |     |     |                   |                 | Ma03_g20800 | osa:4340547 | 4340547 |  |  |
|                                       |     |     |                   |                 | Ma11_g19280 | osa:4344045 | 4344045 |  |  |
|                                       |     |     |                   |                 | Ma09_g06710 | osa:4339645 | 4339645 |  |  |
|                                       |     |     |                   |                 | Ma07_g28490 | osa:4352223 | 4352223 |  |  |
|                                       |     |     |                   |                 | Ma06_g14390 | osa:4337818 | 4337818 |  |  |
|                                       |     |     |                   |                 | Ma10_g15940 | osa:4324554 | 4324554 |  |  |
|                                       |     |     |                   |                 | Ma10_g28640 | osa:4340677 | 4340677 |  |  |
|                                       |     |     |                   |                 | Ma06_g21190 | osa:4337048 | 4337048 |  |  |
|                                       |     |     |                   |                 | Ma11_g08300 | osa:4336216 | 4336216 |  |  |
|                                       |     |     |                   |                 | Ma07_g11340 | osa:4348582 | 4348582 |  |  |
|                                       |     |     |                   |                 | Ma09_g30120 | osa:4337482 | 4337482 |  |  |
|                                       |     |     |                   |                 | Ma02_g07020 | osa:4347074 | 4347074 |  |  |
|                                       |     |     |                   |                 | Ma08_g28660 | osa:4333107 | 4333107 |  |  |
|                                       |     |     |                   |                 | Ma06_g30180 | osa:4350358 | 4350358 |  |  |
|                                       |     |     |                   |                 | Ma10_g27460 | osa:4327329 | 4327329 |  |  |
|                                       |     |     |                   |                 | Ma07_g24940 | osa:4344470 | 4344470 |  |  |
|                                       |     |     |                   |                 | Ma04_g37810 | osa:4333932 | 4333932 |  |  |
|                                       |     |     |                   |                 | Ma09_g11280 | osa:4348138 | 4348138 |  |  |
|                                       |     |     |                   |                 | Ma09_g03450 | osa:4332375 | 4332375 |  |  |
|                                       |     |     |                   |                 | Ma06_g27120 | osa:4329593 | 4329593 |  |  |
|                                       |     |     |                   |                 | Ma06_g31980 | osa:4350476 | 4350476 |  |  |
|                                       |     |     |                   |                 | Ma08_g33830 | osa:4328446 | 4328446 |  |  |
|                                       |     |     |                   |                 | Ma09_g07380 | osa:4332341 | 4332341 |  |  |
|                                       |     |     |                   |                 | Ma10_g18160 | osa:4332014 | 4332014 |  |  |
|                                       |     |     |                   |                 | Ma09_g20310 | osa:4331152 | 4331152 |  |  |
|                                       |     |     |                   |                 | Ma06_g24480 | osa:4332771 | 4332771 |  |  |
|                                       |     |     |                   |                 | Ma11_g20920 | osa:4348176 | 4348176 |  |  |
|                                       |     |     |                   |                 | Ma06_g14400 | osa:4337818 | 4337818 |  |  |
|                                       |     |     |                   |                 | Ma10_g25720 | osa:4345657 | 4345657 |  |  |
|                                       |     |     |                   |                 | Ma04_g00620 | osa:4335984 | 4335984 |  |  |
|                                       |     |     |                   |                 | Ma05_g15910 | osa:4333177 | 4333177 |  |  |
|                                       |     |     |                   |                 | Ma11_g15760 | osa:4343080 | 4343080 |  |  |
|                                       |     |     |                   |                 | Ma06_g09580 | osa:4346136 | 4346136 |  |  |
|                                       |     |     |                   |                 | Ma08_g04770 | osa:4334003 | 4334003 |  |  |
|                                       |     |     |                   |                 | Ma05_g22300 | osa:4349897 | 4349897 |  |  |
|                                       |     |     |                   |                 | Ma08_g06060 | osa:4337733 | 4337733 |  |  |
|                                       |     |     |                   |                 | Ma06_g17200 | osa:4344386 | 4344386 |  |  |
|                                       |     |     |                   |                 | Ma03_g01840 | osa:4343908 | 4343908 |  |  |
|                                       |     |     |                   |                 | Ma03_g16060 | osa:4332151 | 4332151 |  |  |
|                                       |     |     |                   |                 | Ma06_g21530 | osa:4325444 | 4325444 |  |  |
|                                       |     |     |                   |                 | Ma05_g20350 | osa:4334308 | 4334308 |  |  |
|                                       |     |     |                   |                 | Ma11_g07140 | osa:4342137 | 4342137 |  |  |
|                                       |     |     |                   |                 | Ma01_g04420 | osa:4336415 | 4336415 |  |  |
|                                       |     |     |                   |                 | Ma07_g28480 | osa:4352223 | 4352223 |  |  |
|                                       |     |     |                   |                 | Ma10_g24940 | osa:4347311 | 4347311 |  |  |
|                                       |     |     |                   |                 | Ma03_g00220 | osa:4331150 | 4331150 |  |  |
|                                       |     |     |                   |                 | Ma10_g17210 | osa:4352042 | 4352042 |  |  |
|                                       |     |     |                   |                 | Ma02_g22450 | osa:4324557 | 4324557 |  |  |
|                                       |     |     |                   |                 | Ma04_g12630 | osa:4341663 | 4341663 |  |  |
|                                       |     |     |                   |                 | Ma04_g28070 | osa:4352833 | 4352833 |  |  |
|                                       |     |     |                   |                 | Ma09_g03470 | osa:4332375 | 4332375 |  |  |
|                                       |     |     |                   |                 | Ma08_g16510 | osa:4331854 | 4331854 |  |  |
|                                       |     |     |                   |                 | Ma06_g08980 | osa:4351698 | 4351698 |  |  |
|                                       |     |     |                   |                 | Ma08_g07480 | osa:4325027 | 4325027 |  |  |
|                                       |     |     |                   |                 | Ma09_g08110 | osa:4350053 | 4350053 |  |  |
|                                       |     |     |                   |                 | Ma04_g29400 | osa:4333566 | 4333566 |  |  |
|                                       |     |     |                   |                 | Ma03_g09880 | osa:4332519 | 4332519 |  |  |
|                                       |     |     |                   |                 | Ma03_g27870 | osa:4347691 | 4347691 |  |  |
|                                       |     |     |                   |                 | Ma10_g10490 | osa:4329593 | 4329593 |  |  |
|                                       |     |     |                   |                 | Ma05_g21330 | osa:4327981 | 4327981 |  |  |
|                                       |     |     |                   |                 | Ma04_g07860 | osa:4327859 | 4327859 |  |  |
|                                       |     |     |                   |                 | Ma08_g11970 | osa:4336753 | 4336753 |  |  |
| Biosynthesis of secondary metabolites | 312 | 779 | 0.000646219209314 | 0.0256333619695 |             |             |         |  |  |

|             |             |         |
|-------------|-------------|---------|
| Ma10_g20560 | osa:4350636 | 4350636 |
| Ma07_g09220 | osa:4341249 | 4341249 |
| Ma08_g33290 | osa:4325067 | 4325067 |
| Ma09_g25700 | osa:4340240 | 4340240 |
| Ma04_g11650 | osa:4324809 | 4324809 |
| Ma06_g14310 | osa:4351698 | 4351698 |
| Ma08_g08880 | osa:4346159 | 4346159 |
| Ma05_g00310 | osa:4341792 | 4341792 |
| Ma01_g21520 | osa:4344496 | 4344496 |
| Ma03_g26140 | osa:4338768 | 4338768 |
| Ma08_g06070 | osa:4352549 | 4352549 |
| Ma09_g20570 | osa:4337406 | 4337406 |
| Ma07_g28090 | osa:4333156 | 4333156 |
| Ma07_g06700 | osa:4349111 | 4349111 |
| Ma06_g29250 | osa:4332041 | 4332041 |
| Ma01_g17990 | osa:4343721 | 4343721 |
| Ma06_g28330 | osa:4339812 | 4339812 |
| Ma05_g16190 | osa:4331917 | 4331917 |
| Ma04_g18620 | osa:4334912 | 4334912 |
| Ma03_g05400 | osa:4329329 | 4329329 |
| Ma11_g23980 | osa:4344934 | 4344934 |
| Ma10_g23920 | osa:4345689 | 4345689 |
| Ma10_g16100 | osa:4337818 | 4337818 |
| Ma04_g10090 | osa:4326266 | 4326266 |
| Ma08_g29910 | osa:4350053 | 4350053 |
| Ma07_g02100 | osa:4337733 | 4337733 |
| Ma03_g06130 | osa:4340240 | 4340240 |
| Ma01_g20320 | osa:4327172 | 4327172 |
| Ma03_g11800 | osa:4346529 | 4346529 |
| Ma05_g23060 | osa:4349318 | 4349318 |
| Ma09_g07020 | osa:4352058 | 4352058 |
| Ma02_g21000 | osa:4332373 | 4332373 |
| Ma08_g03130 | osa:4333898 | 4333898 |
| Ma02_g09950 | osa:4350053 | 4350053 |
| Ma06_g35790 | osa:4324810 | 4324810 |
| Ma04_g38030 | osa:4333566 | 4333566 |
| Ma07_g10560 | osa:4327301 | 4327301 |
| Ma06_g16590 | osa:4324619 | 4324619 |
| Ma03_g16070 | osa:4339583 | 4339583 |
| Ma07_g16390 | osa:4350476 | 4350476 |
| Ma07_g08400 | osa:4341445 | 4341445 |
| Ma04_g39130 | osa:4334171 | 4334171 |
| Ma04_g02250 | osa:4337265 | 4337265 |
| Ma05_g01700 | osa:4346642 | 4346642 |
| Ma05_g25700 | osa:4327423 | 4327423 |
| Ma06_g24910 | osa:4339677 | 4339677 |
| Ma04_g02590 | osa:4332425 | 4332425 |
| Ma04_g10150 | osa:4345689 | 4345689 |
| Ma06_g29240 | osa:4332041 | 4332041 |
| Ma09_g07280 | osa:4329858 | 4329858 |
| Ma04_g03820 | osa:4335430 | 4335430 |
| Ma08_g19500 | osa:4335756 | 4335756 |
| Ma08_g20630 | osa:4342508 | 4342508 |
| Ma09_g09840 | osa:4324282 | 4324282 |
| Ma07_g28080 | osa:4333156 | 4333156 |
| Ma02_g18360 | osa:4327301 | 4327301 |
| Ma05_g04020 | osa:4336116 | 4336116 |
| Ma04_g32180 | osa:4332236 | 4332236 |
| Ma08_g21280 | osa:4329007 | 4329007 |
| Ma06_g10250 | osa:4338409 | 4338409 |
| Ma03_g03600 | osa:4328168 | 4328168 |
| Ma09_g14520 | osa:4347311 | 4347311 |
| Ma06_g14410 | osa:4337818 | 4337818 |
| Ma06_g01670 | osa:4338802 | 4338802 |
| Novel01132  | osa:4324282 | 4324282 |
| Ma01_g03570 | osa:4340042 | 4340042 |
| Ma11_g15660 | osa:4348804 | 4348804 |
| Ma04_g32060 | osa:4331540 | 4331540 |
| Ma08_g05120 | osa:4342988 | 4342988 |
| Ma09_g23330 | osa:4328485 | 4328485 |
| Ma11_g16750 | osa:4341770 | 4341770 |
| Ma11_g19740 | osa:4330012 | 4330012 |
| Ma06_g09780 | osa:4350636 | 4350636 |
| Ma02_g24860 | osa:4350636 | 4350636 |
| Ma08_g30510 | osa:4344267 | 4344267 |
| Ma05_g27310 | osa:4347520 | 4347520 |
| Ma05_g27700 | osa:4336216 | 4336216 |
| Ma01_g17610 | osa:4337406 | 4337406 |
| Ma05_g30490 | osa:4332519 | 4332519 |
| Ma11_g17540 | osa:4336216 | 4336216 |
| Ma04_g35390 | osa:4349454 | 4349454 |
| Ma03_g00730 | osa:9266710 | 9266710 |
| Ma04_g31940 | osa:4330090 | 4330090 |
| Ma03_g12070 | osa:4331418 | 4331418 |
| Ma09_g12600 | osa:4330747 | 4330747 |
| Ma06_g12620 | osa:4334188 | 4334188 |
| Ma06_g01900 | osa:4341792 | 4341792 |

|             |             |         |
|-------------|-------------|---------|
| Ma10_g14250 | osa:4332425 | 4332425 |
| Ma06_g07590 | osa:4333918 | 4333918 |
| Ma05_g20810 | osa:4332477 | 4332477 |
| Ma09_g24170 | osa:4337437 | 4337437 |
| Ma02_g14780 | osa:4333566 | 4333566 |
| Ma05_g05050 | osa:4340042 | 4340042 |
| Ma08_g29310 | osa:4329889 | 4329889 |
| Ma06_g11320 | osa:4325687 | 4325687 |
| Ma09_g21880 | osa:4339535 | 4339535 |
| Ma06_g23970 | osa:4326635 | 4326635 |
| Ma08_g04920 | osa:4332153 | 4332153 |
| Ma06_g38960 | osa:4336353 | 4336353 |
| Ma09_g02110 | osa:4336216 | 4336216 |
| Ma01_g02270 | osa:4342142 | 4342142 |
| Ma08_g24890 | osa:4330711 | 4330711 |
| Ma08_g27070 | osa:4332134 | 4332134 |
| Ma04_g31690 | osa:4331611 | 4331611 |
| Ma08_g28590 | osa:4324398 | 4324398 |
| Novel00760  | osa:4324442 | 4324442 |
| Ma11_g21050 | osa:4330016 | 4330016 |
| Ma05_g24340 | osa:4341967 | 4341967 |
| Ma03_g05860 | osa:4329701 | 4329701 |
| Ma05_g29980 | osa:4349683 | 4349683 |
| Ma07_g22000 | osa:4345962 | 4345962 |
| Ma07_g06220 | osa:4345284 | 4345284 |
| Ma05_g31950 | osa:4351300 | 4351300 |
| Ma06_g13460 | osa:4352042 | 4352042 |
| Novel01419  | osa:4324282 | 4324282 |
| Ma03_g28580 | osa:4339885 | 4339885 |
| Ma11_g04940 | osa:4348304 | 4348304 |
| Ma07_g11510 | osa:4331893 | 4331893 |
| Ma03_g05380 | osa:4329324 | 4329324 |
| Ma09_g19150 | osa:4336750 | 4336750 |
| Ma03_g06120 | osa:4340725 | 4340725 |
| Ma02_g13970 | osa:4328168 | 4328168 |
| Ma09_g23530 | osa:4336928 | 4336928 |
| Ma04_g07830 | osa:4327859 | 4327859 |
| Ma05_g18650 | osa:4329532 | 4329532 |
| Novel01203  | osa:4334425 | 4334425 |
| Ma01_g16200 | osa:4332563 | 4332563 |
| Ma10_g25840 | osa:4332174 | 4332174 |
| Ma10_g20600 | osa:4350636 | 4350636 |
| Ma03_g31530 | osa:4352146 | 4352146 |
| Ma04_g01300 | osa:4352871 | 4352871 |
| Ma08_g15070 | osa:4348230 | 4348230 |
| Ma08_g14810 | osa:4349044 | 4349044 |
| Ma05_g16480 | osa:4332311 | 4332311 |
| Ma06_g30380 | osa:4329938 | 4329938 |
| Ma06_g08130 | osa:4352058 | 4352058 |
| Ma09_g13580 | osa:4329329 | 4329329 |
| Ma05_g18090 | osa:4344854 | 4344854 |
| Ma06_g31540 | osa:4352747 | 4352747 |
| Ma04_g23630 | osa:9267465 | 9267465 |
| Ma10_g05100 | osa:4326901 | 4326901 |
| Ma11_g15810 | osa:4330012 | 4330012 |
| Ma04_g25530 | osa:4331130 | 4331130 |
| Ma06_g16100 | osa:4341249 | 4341249 |
| Ma06_g35980 | osa:4332375 | 4332375 |
| Ma01_g14880 | osa:4343946 | 4343946 |
| Ma09_g14110 | osa:4341997 | 4341997 |
| Ma03_g32060 | osa:4334116 | 4334116 |
| Ma10_g12270 | osa:4350614 | 4350614 |
| Ma03_g03400 | osa:4341249 | 4341249 |
| Ma09_g08470 | osa:4329593 | 4329593 |
| Ma08_g04450 | osa:4348656 | 4348656 |
| Ma04_g04720 | osa:4342117 | 4342117 |
| Novel00441  | osa:4341792 | 4341792 |
| Ma03_g06970 | osa:4330843 | 4330843 |
| Ma03_g01370 | osa:4325687 | 4325687 |
| Ma07_g01260 | osa:4333566 | 4333566 |
| Ma08_g33410 | osa:4335756 | 4335756 |
| Ma11_g13600 | osa:4332563 | 4332563 |
| Ma11_g24010 | osa:4328439 | 4328439 |
| Ma06_g28940 | osa:4339718 | 4339718 |
| Ma07_g06750 | osa:4328012 | 4328012 |
| Ma04_g07660 | osa:4328124 | 4328124 |
| Ma10_g09700 | osa:4334425 | 4334425 |
| Ma05_g27130 | osa:4328684 | 4328684 |
| Ma08_g04900 | osa:4332153 | 4332153 |
| Ma06_g15020 | osa:4351698 | 4351698 |
| Ma01_g03820 | osa:4343453 | 4343453 |
| Ma10_g16940 | osa:4336153 | 4336153 |
| Ma10_g20860 | osa:4336960 | 4336960 |
| Ma06_g19750 | osa:4344496 | 4344496 |
| Ma08_g10630 | osa:4337732 | 4337732 |
| Ma10_g14440 | osa:4325563 | 4325563 |
| Ma05_g31060 | osa:4325211 | 4325211 |

|                                               |    |     |                  |                 |             |             |         |  |  |
|-----------------------------------------------|----|-----|------------------|-----------------|-------------|-------------|---------|--|--|
|                                               |    |     |                  |                 | Ma04_g22350 | osa:4332236 | 4332236 |  |  |
|                                               |    |     |                  |                 | Ma06_g17860 | osa:4324261 | 4324261 |  |  |
|                                               |    |     |                  |                 | Ma06_g16060 | osa:4341249 | 4341249 |  |  |
|                                               |    |     |                  |                 | Ma01_g21440 | osa:4347520 | 4347520 |  |  |
|                                               |    |     |                  |                 | Ma07_g28990 | osa:4342690 | 4342690 |  |  |
|                                               |    |     |                  |                 | Ma07_g13520 | osa:4327301 | 4327301 |  |  |
|                                               |    |     |                  |                 | Ma03_g16830 | osa:4340025 | 4340025 |  |  |
|                                               |    |     |                  |                 | Ma03_g17510 | osa:4339892 | 4339892 |  |  |
|                                               |    |     |                  |                 | Ma11_g24610 | osa:4350636 | 4350636 |  |  |
|                                               |    |     |                  |                 | Ma03_g02700 | osa:4337818 | 4337818 |  |  |
|                                               |    |     |                  |                 | Ma07_g22060 | osa:4336146 | 4336146 |  |  |
|                                               |    |     |                  |                 | Ma08_g32440 | osa:4337265 | 4337265 |  |  |
|                                               |    |     |                  |                 | Ma07_g11120 | osa:4332174 | 4332174 |  |  |
|                                               |    |     |                  |                 | Ma10_g26330 | osa:4327178 | 4327178 |  |  |
|                                               |    |     |                  |                 | Ma05_g05920 | osa:4340090 | 4340090 |  |  |
|                                               |    |     |                  |                 | Ma01_g01610 | osa:4349114 | 4349114 |  |  |
|                                               |    |     |                  |                 | Ma08_g33300 | osa:4325067 | 4325067 |  |  |
|                                               |    |     |                  |                 | Ma09_g29570 | osa:4329101 | 4329101 |  |  |
|                                               |    |     |                  |                 | Ma08_g25110 | osa:4336146 | 4336146 |  |  |
|                                               |    |     |                  |                 | Ma07_g06760 | osa:4328012 | 4328012 |  |  |
|                                               |    |     |                  |                 | Ma08_g01380 | osa:4337100 | 4337100 |  |  |
|                                               |    |     |                  |                 | Ma04_g36760 | osa:4340251 | 4340251 |  |  |
|                                               |    |     |                  |                 | Ma01_g20340 | osa:4325067 | 4325067 |  |  |
|                                               |    |     |                  |                 | Ma03_g03630 | osa:9266241 | 9266241 |  |  |
|                                               |    |     |                  |                 | Ma09_g06900 | osa:4332041 | 4332041 |  |  |
|                                               |    |     |                  |                 | Ma01_g00130 | osa:4346656 | 4346656 |  |  |
|                                               |    |     |                  |                 | Ma11_g05360 | osa:4338560 | 4338560 |  |  |
|                                               |    |     |                  |                 | Ma07_g09040 | osa:4341325 | 4341325 |  |  |
|                                               |    |     |                  |                 | Ma03_g29220 | osa:4341663 | 4341663 |  |  |
|                                               |    |     |                  |                 | Ma10_g08510 | osa:4347717 | 4347717 |  |  |
|                                               |    |     |                  |                 | Ma02_g05120 | osa:4340026 | 4340026 |  |  |
|                                               |    |     |                  |                 | Ma09_g24600 | osa:4347691 | 4347691 |  |  |
|                                               |    |     |                  |                 | Ma11_g15990 | osa:4349097 | 4349097 |  |  |
|                                               |    |     |                  |                 | Ma03_g14690 | osa:4328073 | 4328073 |  |  |
|                                               |    |     |                  |                 | Ma10_g13290 | osa:4344386 | 4344386 |  |  |
|                                               |    |     |                  |                 | Ma02_g04920 | osa:4341861 | 4341861 |  |  |
|                                               |    |     |                  |                 | Ma06_g10290 | osa:4351300 | 4351300 |  |  |
|                                               |    |     |                  |                 | Ma06_g14670 | osa:4334535 | 4334535 |  |  |
|                                               |    |     |                  |                 | Ma03_g15360 | osa:4338718 | 4338718 |  |  |
|                                               |    |     |                  |                 | Ma02_g14500 | osa:4352791 | 4352791 |  |  |
|                                               |    |     |                  |                 | Ma10_g11420 | osa:4335756 | 4335756 |  |  |
|                                               |    |     |                  |                 | Ma08_g16120 | osa:4349897 | 4349897 |  |  |
|                                               |    |     |                  |                 | Ma09_g31400 | osa:4348690 | 4348690 |  |  |
|                                               |    |     |                  |                 | Ma07_g11500 | osa:4331893 | 4331893 |  |  |
|                                               |    |     |                  |                 | Ma07_g12740 | osa:4349723 | 4349723 |  |  |
|                                               |    |     |                  |                 | Ma10_g27820 | osa:4341247 | 4341247 |  |  |
|                                               |    |     |                  |                 | Ma05_g14980 | osa:4342614 | 4342614 |  |  |
|                                               |    |     |                  |                 | Ma04_g05290 | osa:4351300 | 4351300 |  |  |
|                                               |    |     |                  |                 | Ma10_g28390 | osa:4341445 | 4341445 |  |  |
|                                               |    |     |                  |                 | Ma01_g20350 | osa:4325067 | 4325067 |  |  |
|                                               |    |     |                  |                 | Ma11_g21180 | osa:4336415 | 4336415 |  |  |
|                                               |    |     |                  |                 | Ma09_g06650 | osa:4339718 | 4339718 |  |  |
|                                               |    |     |                  |                 | Ma01_g14940 | osa:4331917 | 4331917 |  |  |
|                                               |    |     |                  |                 | Ma06_g01700 | osa:4324914 | 4324914 |  |  |
|                                               |    |     |                  |                 | Ma03_g13720 | osa:4331150 | 4331150 |  |  |
|                                               |    |     |                  |                 | Ma03_g16650 | osa:4339812 | 4339812 |  |  |
|                                               |    |     |                  |                 | Ma11_g02800 | osa:4336753 | 4336753 |  |  |
|                                               |    |     |                  |                 | Ma05_g23890 | osa:4338560 | 4338560 |  |  |
|                                               |    |     |                  |                 | Ma08_g14830 | osa:4332286 | 4332286 |  |  |
|                                               |    |     |                  |                 | Ma06_g14370 | osa:4337818 | 4337818 |  |  |
|                                               |    |     |                  |                 | Ma10_g12590 | osa:4329518 | 4329518 |  |  |
|                                               |    |     |                  |                 | Ma03_g13910 | osa:4346726 | 4346726 |  |  |
|                                               |    |     |                  |                 | Ma01_g19240 | osa:4341792 | 4341792 |  |  |
|                                               |    |     |                  |                 | Ma00_g05010 | osa:4335335 | 4335335 |  |  |
|                                               |    |     |                  |                 | Ma05_g05010 | osa:4340725 | 4340725 |  |  |
|                                               |    |     |                  |                 | Ma06_g09160 | osa:4329532 | 4329532 |  |  |
|                                               |    |     |                  |                 | Ma11_g23060 | osa:4343164 | 4343164 |  |  |
|                                               |    |     |                  |                 | Ma02_g01570 | osa:4334841 | 4334841 |  |  |
|                                               |    |     |                  |                 | Ma06_g00500 | osa:4328118 | 4328118 |  |  |
|                                               |    |     |                  |                 | Ma04_g13550 | osa:4335430 | 4335430 |  |  |
|                                               |    |     |                  |                 | Ma09_g21200 | osa:4328124 | 4328124 |  |  |
|                                               |    |     |                  |                 | Ma03_g16840 | osa:4340025 | 4340025 |  |  |
|                                               |    |     |                  |                 | Ma10_g20580 | osa:4350636 | 4350636 |  |  |
|                                               |    |     |                  |                 | Ma10_g18290 | osa:4352146 | 4352146 |  |  |
|                                               |    |     |                  |                 | Ma02_g23910 | osa:4343975 | 4343975 |  |  |
|                                               |    |     |                  |                 | Ma04_g01750 | osa:4330753 | 4330753 |  |  |
|                                               |    |     |                  |                 | Ma04_g04720 | osa:4342117 | 4342117 |  |  |
|                                               |    |     |                  |                 | Ma02_g24020 | osa:4330753 | 4330753 |  |  |
|                                               |    |     |                  |                 | Ma10_g28640 | osa:4340677 | 4340677 |  |  |
|                                               |    |     |                  |                 | Ma07_g22060 | osa:4336146 | 4336146 |  |  |
|                                               |    |     |                  |                 | Ma03_g05660 | osa:4345722 | 4345722 |  |  |
|                                               |    |     |                  |                 | Ma08_g25110 | osa:4336146 | 4336146 |  |  |
|                                               |    |     |                  |                 | Ma04_g18460 | osa:4330975 | 4330975 |  |  |
|                                               |    |     |                  |                 | Ma08_g28660 | osa:4333107 | 4333107 |  |  |
|                                               |    |     |                  |                 | Ma02_g20450 | osa:4349333 | 4349333 |  |  |
|                                               |    |     |                  |                 | Ma04_g40060 | osa:4325861 | 4325861 |  |  |
| <a href="#">Starch and sucrose metabolism</a> | 72 | 145 | 0.00228365097945 | 0.0679386166387 |             |             |         |  |  |

|                                             |    |     |                  |                |                                                                                                                                                                                                                                                                                                                                                                                                                                                                                                                                                                                                                                                                                                                                                                                                                                                                                                                                 |                                                                                                                                                                                                                                                                                                                                                                                                                                                                                                                                                                                                                                                                                                                                                                                                                                                                                                                                  |                                                                                                                                                                                                                                                                                                                                                                                                                                                                                                                                                                                                                                                                                  |  |  |
|---------------------------------------------|----|-----|------------------|----------------|---------------------------------------------------------------------------------------------------------------------------------------------------------------------------------------------------------------------------------------------------------------------------------------------------------------------------------------------------------------------------------------------------------------------------------------------------------------------------------------------------------------------------------------------------------------------------------------------------------------------------------------------------------------------------------------------------------------------------------------------------------------------------------------------------------------------------------------------------------------------------------------------------------------------------------|----------------------------------------------------------------------------------------------------------------------------------------------------------------------------------------------------------------------------------------------------------------------------------------------------------------------------------------------------------------------------------------------------------------------------------------------------------------------------------------------------------------------------------------------------------------------------------------------------------------------------------------------------------------------------------------------------------------------------------------------------------------------------------------------------------------------------------------------------------------------------------------------------------------------------------|----------------------------------------------------------------------------------------------------------------------------------------------------------------------------------------------------------------------------------------------------------------------------------------------------------------------------------------------------------------------------------------------------------------------------------------------------------------------------------------------------------------------------------------------------------------------------------------------------------------------------------------------------------------------------------|--|--|
|                                             |    |     |                  |                | Ma07_g11010<br>Ma09_g06900<br>Ma05_g13530<br>Ma03_g07150<br>Ma10_g15780<br>Ma05_g18650<br>Ma02_g23730<br>Ma11_g05360<br>Ma06_g29240<br>Ma03_g01820<br>Ma03_g31530<br>Ma08_g34870<br>Ma07_g28080<br>Ma04_g06090<br>Ma11_g14380<br>Ma10_g19040<br>Ma07_g06220<br>Ma09_g20960<br>Ma03_g28390<br>Ma09_g14520<br>Ma04_g39130<br>Ma07_g02790<br>Ma11_g08450<br>Ma06_g29250<br>Ma06_g04440<br>Ma08_g23170<br>Ma10_g16460<br>Ma03_g32060<br>Ma05_g08040<br>Ma05_g15200<br>Ma03_g19950<br>Ma11_g24070<br>Ma09_g06650<br>Novel01421<br>Ma08_g28360<br>Ma04_g22000<br>Ma04_g20070<br>Ma02_g20460<br>Ma03_g15100<br>Ma06_g28940<br>Ma04_g31170<br>Ma05_g23890<br>Ma05_g05600<br>Ma10_g24460<br>Ma06_g32030<br>Ma01_g00130<br>Ma09_g12560<br>Ma08_g00910<br>Ma04_g16060<br>Ma08_g15070<br>Ma06_g09160<br>Ma07_g28090<br>Ma05_g13480<br>Ma08_g23180<br>Ma10_g24940<br>Ma05_g10310<br>Ma10_g15800<br>Ma06_g16590<br>Ma10_g18290<br>Ma06_g35790 | osa:4346981<br>osa:4332041<br>osa:4344268<br>osa:4347265<br>osa:4335789<br>osa:4329532<br>osa:4343910<br>osa:4338560<br>osa:4332041<br>osa:4343910<br>osa:4352146<br>osa:4352536<br>osa:4333156<br>osa:4345220<br>osa:4344268<br>osa:4330753<br>osa:4345284<br>osa:4335447<br>osa:4347903<br>osa:4347311<br>osa:4334171<br>osa:4346094<br>osa:4324962<br>osa:4332041<br>osa:4337166<br>osa:4345722<br>osa:4324962<br>osa:4334116<br>osa:4347265<br>osa:4349333<br>osa:4327285<br>osa:4341824<br>osa:4339718<br>osa:4347265<br>osa:4324621<br>osa:4335737<br>osa:4349333<br>osa:4349333<br>osa:4335447<br>osa:4339718<br>osa:4349333<br>osa:4338560<br>osa:4340579<br>osa:4330753<br>osa:4330753<br>osa:4346656<br>osa:4330753<br>osa:4346094<br>osa:4324962<br>osa:4348230<br>osa:4329532<br>osa:4333156<br>osa:4349333<br>osa:4332788<br>osa:4347311<br>osa:4347262<br>osa:4335789<br>osa:4324619<br>osa:4352146<br>osa:4324810 | 4346981<br>4332041<br>4344268<br>4347265<br>4335789<br>4329532<br>4343910<br>4338560<br>4332041<br>4343910<br>4352146<br>4352536<br>4333156<br>4345220<br>4344268<br>4330753<br>4345284<br>4335447<br>4347903<br>4347311<br>4334171<br>4346094<br>4324962<br>4332041<br>4337166<br>4345722<br>4324962<br>4334116<br>4347265<br>4349333<br>4327285<br>4341824<br>4339718<br>4347265<br>4324621<br>4335737<br>4349333<br>4349333<br>4335447<br>4339718<br>4349333<br>4338560<br>4340579<br>4330753<br>4330753<br>4346656<br>4330753<br>4346094<br>4324962<br>4348230<br>4329532<br>4333156<br>4349333<br>4332788<br>4347311<br>4347262<br>4335789<br>4324619<br>4352146<br>4324810 |  |  |
| <a href="#">Flavonoid biosynthesis</a>      | 16 | 19  | 0.00496398077969 | 0.118142742557 | Ma03_g05400<br>Ma09_g25700<br>Ma11_g24610<br>Ma03_g06130<br>Ma06_g09780<br>Ma10_g20600<br>Ma02_g24860<br>Ma05_g16480<br>Ma11_g04940<br>Ma06_g10250<br>Ma03_g05380<br>Ma03_g06970<br>Ma09_g13580<br>Ma08_g01380<br>Ma10_g20580<br>Ma10_g20560                                                                                                                                                                                                                                                                                                                                                                                                                                                                                                                                                                                                                                                                                    | osa:4329329<br>osa:4340240<br>osa:4350636<br>osa:4340240<br>osa:4350636<br>osa:4350636<br>osa:4350636<br>osa:4332311<br>osa:4348304<br>osa:4338409<br>osa:4329324<br>osa:4330843<br>osa:4329329<br>osa:4337100<br>osa:4350636<br>osa:4350636                                                                                                                                                                                                                                                                                                                                                                                                                                                                                                                                                                                                                                                                                     | 4329329<br>4340240<br>4350636<br>4340240<br>4350636<br>4350636<br>4350636<br>4332311<br>4348304<br>4338409<br>4329324<br>4330843<br>4329329<br>4337100<br>4350636<br>4350636                                                                                                                                                                                                                                                                                                                                                                                                                                                                                                     |  |  |
| <a href="#">Biosynthesis of amino acids</a> | 92 | 207 | 0.00750037243971 | 0.148757386721 | Ma08_g07480<br>Ma03_g20800<br>Ma04_g04160<br>Ma11_g08300<br>Ma07_g11340<br>Novel00240<br>Ma09_g07380<br>Ma05_g15910<br>Ma08_g06060<br>Ma11_g14450                                                                                                                                                                                                                                                                                                                                                                                                                                                                                                                                                                                                                                                                                                                                                                               | osa:4325027<br>osa:4340547<br>osa:4337230<br>osa:4336216<br>osa:4348582<br>osa:4337230<br>osa:4332341<br>osa:4333177<br>osa:4337733<br>osa:4352839                                                                                                                                                                                                                                                                                                                                                                                                                                                                                                                                                                                                                                                                                                                                                                               | 4325027<br>4340547<br>4337230<br>4336216<br>4348582<br>4337230<br>4332341<br>4333177<br>4337733<br>4352839                                                                                                                                                                                                                                                                                                                                                                                                                                                                                                                                                                       |  |  |



|                                   |    |    |                |                |             |             |         |  |  |
|-----------------------------------|----|----|----------------|----------------|-------------|-------------|---------|--|--|
|                                   |    |    |                |                | Ma06_g21530 | osa:4325444 | 4325444 |  |  |
|                                   |    |    |                |                | Ma00_g04030 | osa:4330649 | 4330649 |  |  |
|                                   |    |    |                |                | Ma08_g28170 | osa:4324655 | 4324655 |  |  |
|                                   |    |    |                |                | Ma04_g28070 | osa:4352833 | 4352833 |  |  |
|                                   |    |    |                |                | Ma10_g11420 | osa:4335756 | 4335756 |  |  |
|                                   |    |    |                |                | Ma03_g03600 | osa:4328168 | 4328168 |  |  |
|                                   |    |    |                |                | Ma03_g16060 | osa:4332151 | 4332151 |  |  |
|                                   |    |    |                |                | Ma09_g26210 | osa:4352839 | 4352839 |  |  |
|                                   |    |    |                |                | Ma05_g00310 | osa:4341792 | 4341792 |  |  |
|                                   |    |    |                |                | Ma05_g01700 | osa:4346642 | 4346642 |  |  |
|                                   |    |    |                |                | Ma09_g20570 | osa:4337406 | 4337406 |  |  |
|                                   |    |    |                |                | Novel01132  | osa:4324282 | 4324282 |  |  |
|                                   |    |    |                |                | Ma04_g18620 | osa:4334912 | 4334912 |  |  |
|                                   |    |    |                |                | Ma07_g02100 | osa:4337733 | 4337733 |  |  |
|                                   |    |    |                |                | Ma06_g08130 | osa:4352058 | 4352058 |  |  |
|                                   |    |    |                |                | Ma03_g11800 | osa:4346529 | 4346529 |  |  |
|                                   |    |    |                |                | Ma11_g23060 | osa:4343164 | 4343164 |  |  |
|                                   |    |    |                |                | Ma08_g03130 | osa:4333898 | 4333898 |  |  |
|                                   |    |    |                |                | Novel01419  | osa:4324282 | 4324282 |  |  |
|                                   |    |    |                |                | Ma07_g10560 | osa:4327301 | 4327301 |  |  |
|                                   |    |    |                |                | Ma09_g29570 | osa:4329101 | 4329101 |  |  |
|                                   |    |    |                |                | Ma03_g32130 | osa:4334101 | 4334101 |  |  |
|                                   |    |    |                |                | Ma03_g16070 | osa:4339583 | 4339583 |  |  |
|                                   |    |    |                |                | Ma09_g07280 | osa:4329858 | 4329858 |  |  |
|                                   |    |    |                |                | Ma04_g03820 | osa:4335430 | 4335430 |  |  |
|                                   |    |    |                |                | Ma09_g09840 | osa:4324282 | 4324282 |  |  |
|                                   |    |    |                |                | Ma08_g33830 | osa:4328446 | 4328446 |  |  |
|                                   |    |    |                |                | Ma02_g18360 | osa:4327301 | 4327301 |  |  |
|                                   |    |    |                |                | Ma05_g21880 | osa:4335048 | 4335048 |  |  |
|                                   |    |    |                |                | Ma08_g14830 | osa:4332286 | 4332286 |  |  |
|                                   |    |    |                |                | Ma01_g03570 | osa:4340042 | 4340042 |  |  |
|                                   |    |    |                |                | Ma05_g27700 | osa:4336216 | 4336216 |  |  |
|                                   |    |    |                |                | Ma04_g35390 | osa:4349454 | 4349454 |  |  |
|                                   |    |    |                |                | Ma02_g08140 | osa:4350964 | 4350964 |  |  |
|                                   |    |    |                |                | Ma08_g19500 | osa:4335756 | 4335756 |  |  |
|                                   |    |    |                |                | Ma09_g12600 | osa:4330747 | 4330747 |  |  |
|                                   |    |    |                |                | Ma06_g12620 | osa:4334188 | 4334188 |  |  |
|                                   |    |    |                |                | Ma06_g01900 | osa:4341792 | 4341792 |  |  |
|                                   |    |    |                |                | Ma06_g07590 | osa:4333918 | 4333918 |  |  |
|                                   |    |    |                |                | Ma06_g26610 | osa:4331941 | 4331941 |  |  |
|                                   |    |    |                |                | Ma05_g20810 | osa:4332477 | 4332477 |  |  |
|                                   |    |    |                |                | Ma05_g31060 | osa:4325211 | 4325211 |  |  |
|                                   |    |    |                |                | Ma11_g17540 | osa:4336216 | 4336216 |  |  |
|                                   |    |    |                |                | Ma06_g38960 | osa:4336353 | 4336353 |  |  |
|                                   |    |    |                |                | Ma09_g02110 | osa:4336216 | 4336216 |  |  |
|                                   |    |    |                |                | Ma03_g21060 | osa:4330649 | 4330649 |  |  |
|                                   |    |    |                |                | Ma08_g28590 | osa:4324398 | 4324398 |  |  |
|                                   |    |    |                |                | Novel00760  | osa:4324442 | 4324442 |  |  |
|                                   |    |    |                |                | Ma06_g24910 | osa:4339677 | 4339677 |  |  |
|                                   |    |    |                |                | Ma08_g02290 | osa:4338979 | 4338979 |  |  |
|                                   |    |    |                |                | Ma09_g07020 | osa:4352058 | 4352058 |  |  |
|                                   |    |    |                |                | Ma01_g19240 | osa:4341792 | 4341792 |  |  |
|                                   |    |    |                |                | Ma01_g16200 | osa:4332563 | 4332563 |  |  |
|                                   |    |    |                |                | Ma06_g30380 | osa:4329938 | 4329938 |  |  |
|                                   |    |    |                |                | Ma04_g27940 | osa:4334101 | 4334101 |  |  |
|                                   |    |    |                |                | Ma11_g07780 | osa:4341713 | 4341713 |  |  |
|                                   |    |    |                |                | Ma07_g13520 | osa:4327301 | 4327301 |  |  |
|                                   |    |    |                |                | Ma01_g14880 | osa:4343946 | 4343946 |  |  |
|                                   |    |    |                |                | Ma05_g22300 | osa:4349897 | 4349897 |  |  |
|                                   |    |    |                |                | Ma08_g16120 | osa:4349897 | 4349897 |  |  |
|                                   |    |    |                |                | Ma11_g20920 | osa:4348176 | 4348176 |  |  |
|                                   |    |    |                |                | Novel00441  | osa:4341792 | 4341792 |  |  |
|                                   |    |    |                |                | Ma08_g33410 | osa:4335756 | 4335756 |  |  |
|                                   |    |    |                |                | Ma11_g13600 | osa:4332563 | 4332563 |  |  |
|                                   |    |    |                |                | Ma10_g07330 | osa:4341713 | 4341713 |  |  |
|                                   |    |    |                |                | Ma10_g09700 | osa:4334425 | 4334425 |  |  |
|                                   |    |    |                |                | Ma11_g07790 | osa:4337230 | 4337230 |  |  |
|                                   |    |    |                |                | Ma01_g17610 | osa:4337406 | 4337406 |  |  |
|                                   |    |    |                |                | Ma02_g13970 | osa:4328168 | 4328168 |  |  |
|                                   |    |    |                |                | Novel01203  | osa:4334425 | 4334425 |  |  |
|                                   |    |    |                |                | Ma06_g17860 | osa:4324261 | 4324261 |  |  |
|                                   |    |    |                |                | Ma03_g16830 | osa:4340025 | 4340025 |  |  |
|                                   |    |    |                |                | Ma05_g05050 | osa:4340042 | 4340042 |  |  |
|                                   |    |    |                |                | Ma03_g27870 | osa:4347691 | 4347691 |  |  |
|                                   |    |    |                |                | Ma10_g08510 | osa:4347717 | 4347717 |  |  |
|                                   |    |    |                |                | Ma02_g05120 | osa:4340026 | 4340026 |  |  |
|                                   |    |    |                |                | Ma09_g24600 | osa:4347691 | 4347691 |  |  |
|                                   |    |    |                |                | Ma07_g12740 | osa:4349723 | 4349723 |  |  |
|                                   |    |    |                |                | Ma02_g11180 | osa:4339425 | 4339425 |  |  |
|                                   |    |    |                |                | Ma02_g18420 | osa:4341321 | 4341321 |  |  |
|                                   |    |    |                |                | Ma04_g13550 | osa:4335430 | 4335430 |  |  |
|                                   |    |    |                |                | Ma03_g16840 | osa:4340025 | 4340025 |  |  |
|                                   |    |    |                |                | Ma03_g05400 | osa:4329329 | 4329329 |  |  |
|                                   |    |    |                |                | Ma04_g25530 | osa:4331130 | 4331130 |  |  |
|                                   |    |    |                |                | Ma08_g29910 | osa:4350053 | 4350053 |  |  |
|                                   |    |    |                |                | Ma07_g11500 | osa:4331893 | 4331893 |  |  |
| Degradation of aromatic compounds | 11 | 12 | 0.012695145403 | 0.198165049352 |             |             |         |  |  |

|                                                             |    |     |                 |                |                                                                                                                                                                                                                                                                                                                                                                                                                                                                                                                                                                                                                                                                                                                |                                                                                                                                                                                                                                                                                                                                                                                                                                                                                                                                                                                                                                                                                                                |                                                                                                                                                                                                                                                                                                                                                                                                                                                                                                                        |  |  |
|-------------------------------------------------------------|----|-----|-----------------|----------------|----------------------------------------------------------------------------------------------------------------------------------------------------------------------------------------------------------------------------------------------------------------------------------------------------------------------------------------------------------------------------------------------------------------------------------------------------------------------------------------------------------------------------------------------------------------------------------------------------------------------------------------------------------------------------------------------------------------|----------------------------------------------------------------------------------------------------------------------------------------------------------------------------------------------------------------------------------------------------------------------------------------------------------------------------------------------------------------------------------------------------------------------------------------------------------------------------------------------------------------------------------------------------------------------------------------------------------------------------------------------------------------------------------------------------------------|------------------------------------------------------------------------------------------------------------------------------------------------------------------------------------------------------------------------------------------------------------------------------------------------------------------------------------------------------------------------------------------------------------------------------------------------------------------------------------------------------------------------|--|--|
|                                                             |    |     |                 |                | Ma09_g08110<br>Ma06_g10250<br>Ma03_g05380<br>Ma02_g09950<br>Ma09_g13580<br>Ma04_g31940<br>Ma07_g11510                                                                                                                                                                                                                                                                                                                                                                                                                                                                                                                                                                                                          | osa:4350053<br>osa:4338409<br>osa:4329324<br>osa:4350053<br>osa:4329329<br>osa:4330090<br>osa:4331893                                                                                                                                                                                                                                                                                                                                                                                                                                                                                                                                                                                                          | 4350053<br>4338409<br>4329324<br>4350053<br>4329329<br>4330090<br>4331893                                                                                                                                                                                                                                                                                                                                                                                                                                              |  |  |
| <a href="#">alpha-Linolenic acid metabolism</a>             | 21 | 33  | 0.0133220201245 | 0.198165049352 | Ma08_g23400<br>Ma03_g17130<br>Ma03_g07770<br>Novel01373<br>Ma03_g11520<br>Ma08_g14010<br>Ma04_g02560<br>Ma11_g15660<br>Ma02_g24010<br>Ma03_g33110<br>Ma07_g02270<br>Ma02_g22720<br>Ma09_g12090<br>Ma04_g38880<br>Ma09_g18930<br>Ma02_g15160<br>Ma09_g15420<br>Ma07_g11670<br>Ma03_g00220<br>Ma06_g15030<br>Ma03_g13720                                                                                                                                                                                                                                                                                                                                                                                         | osa:4331824<br>osa:4333201<br>osa:4331824<br>osa:4339846<br>osa:4328603<br>osa:4331515<br>osa:4333201<br>osa:4348804<br>osa:4340986<br>osa:4333201<br>osa:4345762<br>osa:4340485<br>osa:4345994<br>osa:4334233<br>osa:4352160<br>osa:4334233<br>osa:4331824<br>osa:4333862<br>osa:4331150<br>osa:4328040<br>osa:4331150                                                                                                                                                                                                                                                                                                                                                                                        | 4331824<br>4333201<br>4331824<br>4339846<br>4328603<br>4331515<br>4333201<br>4348804<br>4340986<br>4333201<br>4345762<br>4340485<br>4345994<br>4334233<br>4352160<br>4334233<br>4331824<br>4333862<br>4331150<br>4328040<br>4331150                                                                                                                                                                                                                                                                                    |  |  |
| <a href="#">Amino sugar and nucleotide sugar metabolism</a> | 46 | 103 | 0.0450392112642 | 0.573630420867 | Ma03_g03630<br>Ma05_g24340<br>Ma08_g33300<br>Ma10_g24940<br>Ma05_g29980<br>Ma10_g28640<br>Ma07_g06220<br>Ma04_g18460<br>Ma02_g04620<br>Ma01_g20320<br>Ma02_g21000<br>Ma01_g20340<br>Ma06_g31980<br>Ma08_g15070<br>Ma01_g00130<br>Ma10_g14250<br>Ma08_g33280<br>Ma10_g18160<br>Ma03_g31530<br>Ma07_g16390<br>Ma07_g28080<br>Ma11_g23980<br>Ma09_g14520<br>Ma07_g02790<br>Ma11_g08450<br>Ma04_g23630<br>Ma06_g04440<br>Ma10_g16460<br>Ma01_g20350<br>Ma09_g06650<br>Ma03_g15360<br>Ma06_g28940<br>Ma08_g33290<br>Ma05_g05600<br>Ma06_g28330<br>Ma09_g24170<br>Ma04_g02590<br>Ma03_g16650<br>Ma08_g00910<br>Ma04_g16060<br>Ma06_g01670<br>Ma07_g28090<br>Ma09_g23530<br>Ma06_g01700<br>Ma10_g18290<br>Ma08_g28660 | osa:9266241<br>osa:4341967<br>osa:4325067<br>osa:4347311<br>osa:4349683<br>osa:4340677<br>osa:4345284<br>osa:4330975<br>osa:4340050<br>osa:4327172<br>osa:4332373<br>osa:4325067<br>osa:4350476<br>osa:4348230<br>osa:4346656<br>osa:4332425<br>osa:4325067<br>osa:4332014<br>osa:4352146<br>osa:4350476<br>osa:4333156<br>osa:4344934<br>osa:4347311<br>osa:4346094<br>osa:4324962<br>osa:9267465<br>osa:4337166<br>osa:4324962<br>osa:4325067<br>osa:4339718<br>osa:4338718<br>osa:4339718<br>osa:4325067<br>osa:4340579<br>osa:4339812<br>osa:4337437<br>osa:4332425<br>osa:4339812<br>osa:4346094<br>osa:4324962<br>osa:4338802<br>osa:4333156<br>osa:4336928<br>osa:4324914<br>osa:4352146<br>osa:4333107 | 9266241<br>4341967<br>4325067<br>4347311<br>4349683<br>4340677<br>4345284<br>4330975<br>4340050<br>4327172<br>4332373<br>4325067<br>4350476<br>4348230<br>4346656<br>4332425<br>4325067<br>4332014<br>4352146<br>4350476<br>4333156<br>4344934<br>4347311<br>4346094<br>4324962<br>9267465<br>4337166<br>4324962<br>4325067<br>4339718<br>4338718<br>4339718<br>4325067<br>4340579<br>4339812<br>4337437<br>4332425<br>4339812<br>4346094<br>4324962<br>4338802<br>4333156<br>4336928<br>4324914<br>4352146<br>4333107 |  |  |
| <a href="#">Zeatin biosynthesis</a>                         | 10 | 14  | 0.0482042370477 | 0.573630420867 | Ma05_g21640<br>Ma07_g08820<br>Ma09_g21880<br>Ma04_g23150<br>Ma08_g03900<br>Ma03_g08660<br>Ma08_g23380<br>Ma01_g02270<br>Ma04_g21780<br>Ma09_g16350                                                                                                                                                                                                                                                                                                                                                                                                                                                                                                                                                             | osa:4348932<br>osa:4327887<br>osa:4339535<br>osa:4336629<br>osa:4348932<br>osa:4326515<br>osa:4326515<br>osa:4342142<br>osa:4348932<br>osa:4326515                                                                                                                                                                                                                                                                                                                                                                                                                                                                                                                                                             | 4348932<br>4327887<br>4339535<br>4336629<br>4348932<br>4326515<br>4326515<br>4342142<br>4348932<br>4326515                                                                                                                                                                                                                                                                                                                                                                                                             |  |  |

|                                                    |    |     |                 |                |                                                                                                                                                                                                                                                                                                                                                                                                                                                                                                                                                                                        |                                                                                                                                                                                                                                                                                                                                                                                                                                                                                                                                                                                        |                                                                                                                                                                                                                                                                                                                                                                                                                                |  |  |
|----------------------------------------------------|----|-----|-----------------|----------------|----------------------------------------------------------------------------------------------------------------------------------------------------------------------------------------------------------------------------------------------------------------------------------------------------------------------------------------------------------------------------------------------------------------------------------------------------------------------------------------------------------------------------------------------------------------------------------------|----------------------------------------------------------------------------------------------------------------------------------------------------------------------------------------------------------------------------------------------------------------------------------------------------------------------------------------------------------------------------------------------------------------------------------------------------------------------------------------------------------------------------------------------------------------------------------------|--------------------------------------------------------------------------------------------------------------------------------------------------------------------------------------------------------------------------------------------------------------------------------------------------------------------------------------------------------------------------------------------------------------------------------|--|--|
| <a href="#">Carotenoid biosynthesis</a>            | 15 | 26  | 0.056975480684  | 0.616371109218 | Ma11_g07140<br>Ma11_g02800<br>Ma09_g20310<br>Ma10_g17210<br>Ma04_g28360<br>Ma04_g00620<br>Ma08_g16510<br>Ma06_g13460<br>Ma07_g01260<br>Ma04_g29400<br>Ma02_g14780<br>Ma04_g38030<br>Ma06_g14670<br>Ma09_g14710<br>Ma08_g11970                                                                                                                                                                                                                                                                                                                                                          | osa:4342137<br>osa:4336753<br>osa:4331152<br>osa:4352042<br>osa:4347261<br>osa:4335984<br>osa:4331854<br>osa:4352042<br>osa:4333566<br>osa:4333566<br>osa:4333566<br>osa:4333566<br>osa:4333566<br>osa:4334535<br>osa:4347261<br>osa:4336753                                                                                                                                                                                                                                                                                                                                           | 4342137<br>4336753<br>4331152<br>4352042<br>4347261<br>4335984<br>4331854<br>4352042<br>4333566<br>4333566<br>4333566<br>4333566<br>4334535<br>4347261<br>4336753                                                                                                                                                                                                                                                              |  |  |
| <a href="#">Cysteine and methionine metabolism</a> | 38 | 85  | 0.0631406540487 | 0.618522934881 | Ma06_g22100<br>Ma10_g16100<br>Ma07_g27160<br>Ma07_g02100<br>Ma06_g14390<br>Ma03_g02700<br>Ma07_g20920<br>Ma09_g29570<br>Ma09_g19150<br>Ma07_g06760<br>Ma06_g05530<br>Ma03_g32130<br>Ma06_g14410<br>Ma05_g25700<br>Ma09_g13000<br>Ma10_g25720<br>Ma04_g01300<br>Ma06_g31540<br>Ma08_g06060<br>Ma03_g04640<br>Ma04_g27940<br>Ma11_g14450<br>Ma08_g28170<br>Ma04_g28070<br>Ma08_g04450<br>Ma09_g01600<br>Ma05_g21880<br>Ma02_g11180<br>Ma06_g14400<br>Ma06_g12620<br>Ma07_g06750<br>Ma06_g14370<br>Ma02_g18420<br>Ma06_g26610<br>Ma09_g26210<br>Ma05_g01700<br>Ma04_g06200<br>Ma05_g26570 | osa:4350524<br>osa:4337818<br>osa:4331707<br>osa:4337733<br>osa:4337818<br>osa:4337818<br>osa:4329955<br>osa:4329101<br>osa:4336750<br>osa:4328012<br>osa:4329955<br>osa:4334101<br>osa:4337818<br>osa:4327423<br>osa:4347103<br>osa:4345657<br>osa:4352871<br>osa:4352747<br>osa:4337733<br>osa:4329955<br>osa:4334101<br>osa:4352839<br>osa:4324655<br>osa:4352833<br>osa:4348656<br>osa:4350455<br>osa:4335048<br>osa:4339425<br>osa:4337818<br>osa:4334188<br>osa:4328012<br>osa:4337818<br>osa:4341321<br>osa:4331941<br>osa:4352839<br>osa:4346642<br>osa:4342996<br>osa:4329955 | 4350524<br>4337818<br>4331707<br>4337733<br>4337818<br>4337818<br>4329955<br>4329101<br>4336750<br>4328012<br>4329955<br>4334101<br>4337818<br>4327423<br>4347103<br>4345657<br>4352871<br>4352747<br>4337733<br>4329955<br>4334101<br>4352839<br>4324655<br>4352833<br>4348656<br>4350455<br>4335048<br>4339425<br>4337818<br>4334188<br>4328012<br>4337818<br>4341321<br>4331941<br>4352839<br>4346642<br>4342996<br>4329955 |  |  |
| <a href="#">Glycolysis / Gluconeogenesis</a>       | 50 | 119 | 0.0747531448936 | 0.618522934881 | Ma08_g07480<br>Ma10_g12590<br>Ma08_g29910<br>Ma07_g13520<br>Ma05_g00310<br>Ma10_g28640<br>Ma04_g25530<br>Ma11_g08300<br>Ma07_g11340<br>Ma05_g30490<br>Ma07_g10560<br>Ma07_g06760<br>Ma09_g11280<br>Ma08_g15070<br>Ma08_g33830<br>Ma07_g12740<br>Ma11_g20920<br>Ma03_g27870<br>Ma09_g24600<br>Ma02_g18360<br>Novel00441<br>Ma09_g14520<br>Ma01_g19240<br>Ma01_g03570<br>Ma08_g32440<br>Ma07_g11500<br>Ma11_g16750<br>Ma05_g22300<br>Ma08_g16120<br>Ma05_g27700<br>Ma09_g08110<br>Ma03_g09880                                                                                            | osa:4325027<br>osa:4329518<br>osa:4350053<br>osa:4327301<br>osa:4341792<br>osa:4340677<br>osa:4331130<br>osa:4336216<br>osa:4348582<br>osa:4332519<br>osa:4327301<br>osa:4328012<br>osa:4348138<br>osa:4348230<br>osa:4328446<br>osa:4349723<br>osa:4348176<br>osa:4347691<br>osa:4347691<br>osa:4327301<br>osa:4341792<br>osa:4347311<br>osa:4341792<br>osa:4340042<br>osa:4337265<br>osa:4331893<br>osa:4341770<br>osa:4349897<br>osa:4349897<br>osa:4336216<br>osa:4350053<br>osa:4332519                                                                                           | 4325027<br>4329518<br>4350053<br>4327301<br>4341792<br>4340677<br>4331130<br>4336216<br>4348582<br>4332519<br>4327301<br>4328012<br>4348138<br>4348230<br>4328446<br>4349723<br>4348176<br>4347691<br>4347691<br>4327301<br>4341792<br>4347311<br>4341792<br>4340042<br>4337265<br>4331893<br>4341770<br>4349897<br>4349897<br>4336216<br>4350053<br>4332519                                                                   |  |  |

|                                                            |     |      |                 |                |                                                                                                                                                                                                                                                                                                                                                       |                                                                                                                                                                                                                                                                                                                                                       |                                                                                                                                                                                                                                                           |  |  |
|------------------------------------------------------------|-----|------|-----------------|----------------|-------------------------------------------------------------------------------------------------------------------------------------------------------------------------------------------------------------------------------------------------------------------------------------------------------------------------------------------------------|-------------------------------------------------------------------------------------------------------------------------------------------------------------------------------------------------------------------------------------------------------------------------------------------------------------------------------------------------------|-----------------------------------------------------------------------------------------------------------------------------------------------------------------------------------------------------------------------------------------------------------|--|--|
|                                                            |     |      |                 |                | Ma02_g09950<br>Ma11_g17540<br>Ma04_g35390<br>Ma04_g02250<br>Ma07_g11510<br>Ma09_g12600<br>Ma06_g01900<br>Ma07_g06750<br>Ma05_g31060<br>Ma08_g08880<br>Ma05_g05050<br>Ma05_g05010<br>Ma09_g20570<br>Ma10_g24940<br>Ma09_g02110<br>Ma01_g17610<br>Ma04_g31940                                                                                           | osa:4350053<br>osa:4336216<br>osa:4349454<br>osa:4337265<br>osa:4331893<br>osa:4330747<br>osa:4341792<br>osa:4328012<br>osa:4325211<br>osa:4346159<br>osa:4340042<br>osa:4340725<br>osa:4337406<br>osa:4347311<br>osa:4336216<br>osa:4337406<br>osa:4330090                                                                                           | 4350053<br>4336216<br>4349454<br>4337265<br>4331893<br>4330747<br>4341792<br>4328012<br>4325211<br>4346159<br>4340042<br>4340725<br>4337406<br>4347311<br>4336216<br>4337406<br>4330090                                                                   |  |  |
| <a href="#">Pentose and glucuronate interconversions</a>   | 20  | 41   | 0.0899779708502 | 0.618522934881 | Ma05_g13530<br>Ma05_g05010<br>Ma08_g23170<br>Ma05_g24340<br>Ma03_g05660<br>Ma08_g34870<br>Ma04_g26280<br>Ma04_g33260<br>Ma03_g31530<br>Ma03_g06120<br>Ma07_g28080<br>Ma07_g28090<br>Ma03_g19950<br>Ma03_g13710<br>Ma03_g08830<br>Ma04_g40060<br>Ma03_g00210<br>Ma11_g14380<br>Ma10_g18290<br>Ma04_g26260                                              | osa:4344268<br>osa:4340725<br>osa:4345722<br>osa:4341967<br>osa:4345722<br>osa:4352536<br>osa:4346217<br>osa:4335013<br>osa:4352146<br>osa:4340725<br>osa:4333156<br>osa:4333156<br>osa:4327285<br>osa:4335013<br>osa:4344231<br>osa:4325861<br>osa:4335013<br>osa:4344268<br>osa:4352146<br>osa:4346217                                              | 4344268<br>4340725<br>4345722<br>4341967<br>4345722<br>4352536<br>4346217<br>4335013<br>4352146<br>4340725<br>4333156<br>4333156<br>4327285<br>4335013<br>4344231<br>4325861<br>4335013<br>4344268<br>4352146<br>4346217                                  |  |  |
| <a href="#">Valine, leucine and isoleucine degradation</a> | 18  | 36   | 0.0909306505528 | 0.618522934881 | Ma11_g21350<br>Ma03_g12070<br>Ma08_g15550<br>Ma11_g21360<br>Ma03_g00220<br>Ma04_g10090<br>Ma04_g28920<br>Ma03_g06120<br>Ma05_g05010<br>Ma08_g30510<br>Ma04_g09570<br>Ma08_g20630<br>Ma11_g15660<br>Ma08_g25460<br>Ma01_g14700<br>Ma03_g13720<br>Ma03_g16070<br>Ma03_g16060                                                                            | osa:4330184<br>osa:4331418<br>osa:4351929<br>osa:4330184<br>osa:4331150<br>osa:4326266<br>osa:4342610<br>osa:4340725<br>osa:4340725<br>osa:4344267<br>osa:4352741<br>osa:4342508<br>osa:4348804<br>osa:4352741<br>osa:4345605<br>osa:4331150<br>osa:4339583<br>osa:4332151                                                                            | 4330184<br>4331418<br>4351929<br>4330184<br>4331150<br>4326266<br>4342610<br>4340725<br>4340725<br>4344267<br>4352741<br>4342508<br>4348804<br>4352741<br>4345605<br>4331150<br>4339583<br>4332151                                                        |  |  |
| <a href="#">Thiamine metabolism</a>                        | 7   | 10   | 0.0979543332004 | 0.618522934881 | Ma04_g30490<br>Ma05_g14980<br>Ma06_g35590<br>Ma08_g09930<br>Ma03_g26140<br>Ma02_g15890<br>Ma05_g05920                                                                                                                                                                                                                                                 | osa:4343443<br>osa:4342614<br>osa:4333719<br>osa:4326818<br>osa:4338768<br>osa:4343443<br>osa:4340090                                                                                                                                                                                                                                                 | 4343443<br>4342614<br>4333719<br>4326818<br>4338768<br>4343443<br>4340090                                                                                                                                                                                 |  |  |
| <a href="#">Metabolic pathways</a>                         | 534 | 1549 | 0.0982383032286 | 0.618522934881 | Ma03_g20800<br>Ma10_g18160<br>Ma10_g28640<br>Ma04_g22620<br>Ma02_g24010<br>Ma09_g06640<br>Ma02_g21000<br>Ma04_g38030<br>Ma04_g37810<br>Ma04_g14940<br>Ma08_g33830<br>Ma09_g20310<br>Ma08_g02290<br>Ma04_g06090<br>Ma08_g06060<br>Ma06_g17200<br>Ma09_g30540<br>Ma11_g14450<br>Ma07_g02790<br>Ma00_g04030<br>Ma11_g07140<br>Ma01_g21520<br>Ma07_g17020 | osa:4340547<br>osa:4332014<br>osa:4340677<br>osa:4339874<br>osa:4340986<br>osa:4324599<br>osa:4332373<br>osa:4333566<br>osa:4333932<br>osa:4324599<br>osa:4328446<br>osa:4331152<br>osa:4338979<br>osa:4345220<br>osa:4337733<br>osa:4344386<br>osa:4349859<br>osa:4352839<br>osa:4346094<br>osa:4330649<br>osa:4342137<br>osa:4344496<br>osa:4335701 | 4340547<br>4332014<br>4340677<br>4339874<br>4340986<br>4324599<br>4332373<br>4333566<br>4333932<br>4324599<br>4328446<br>4331152<br>4338979<br>4345220<br>4337733<br>4344386<br>4349859<br>4352839<br>4346094<br>4330649<br>4342137<br>4344496<br>4335701 |  |  |

|              |             |         |
|--------------|-------------|---------|
| Ma03_g00220  | osa:4331150 | 4331150 |
| Ma10_g17210  | osa:4352042 | 4352042 |
| Ma02_g22450  | osa:4324557 | 4324557 |
| Ma05_g26570  | osa:4329955 | 4329955 |
| Ma05_g21880  | osa:4335048 | 4335048 |
| Novel01421   | osa:4347265 | 4347265 |
| Ma05_g21330  | osa:4327981 | 4327981 |
| Ma03_g16060  | osa:4332151 | 4332151 |
| Ma07_g10180  | osa:4350917 | 4350917 |
| Ma02_g05150  | osa:4340008 | 4340008 |
| Ma05_g05600  | osa:4340579 | 4340579 |
| Ma06_g28330  | osa:4339812 | 4339812 |
| Ma05_g00310  | osa:4341792 | 4341792 |
| Ma04_g28920  | osa:4342610 | 4342610 |
| Ma06_g14310  | osa:4351698 | 4351698 |
| Ma07_g28090  | osa:4333156 | 4333156 |
| Ma03_g28390  | osa:4347903 | 4347903 |
| Ma04_g18620  | osa:4334912 | 4334912 |
| Ma10_g16100  | osa:4337818 | 4337818 |
| mito3_g00150 | osa:6450138 | 6450138 |
| Ma08_g03130  | osa:4333898 | 4333898 |
| Ma08_g05390  | osa:4327833 | 4327833 |
| Ma04_g16060  | osa:4324962 | 4324962 |
| Ma06_g05530  | osa:4329955 | 4329955 |
| Ma03_g27870  | osa:4347691 | 4347691 |
| Ma06_g32030  | osa:4330753 | 4330753 |
| Ma11_g16750  | osa:4341770 | 4341770 |
| Ma04_g10150  | osa:4345689 | 4345689 |
| Ma09_g07280  | osa:4329858 | 4329858 |
| Ma04_g04160  | osa:4337230 | 4337230 |
| Ma08_g20630  | osa:4342508 | 4342508 |
| Ma09_g09840  | osa:4324282 | 4324282 |
| Ma05_g04020  | osa:4336116 | 4336116 |
| Ma11_g20450  | osa:4349278 | 4349278 |
| Ma10_g16940  | osa:4336153 | 4336153 |
| Ma03_g14310  | osa:4346332 | 4346332 |
| Ma06_g04440  | osa:4337166 | 4337166 |
| Ma03_g27370  | osa:4347947 | 4347947 |
| Ma07_g05720  | osa:4352511 | 4352511 |
| Ma04_g33980  | osa:4330413 | 4330413 |
| Ma11_g24070  | osa:4341824 | 4341824 |
| Ma01_g17610  | osa:4337406 | 4337406 |
| Ma05_g24340  | osa:4341967 | 4341967 |
| Ma11_g15990  | osa:4349097 | 4349097 |
| Ma02_g08140  | osa:4350964 | 4350964 |
| Ma11_g21350  | osa:4330184 | 4330184 |
| Ma06_g01900  | osa:4341792 | 4341792 |
| Ma07_g27160  | osa:4331707 | 4331707 |
| Ma06_g11320  | osa:4325687 | 4325687 |
| Ma05_g27310  | osa:4347520 | 4347520 |
| Ma08_g04920  | osa:4332153 | 4332153 |
| Ma07_g15870  | osa:4328326 | 4328326 |
| Ma08_g24890  | osa:4330711 | 4330711 |
| Ma08_g28590  | osa:4324398 | 4324398 |
| Novel00760   | osa:4324442 | 4324442 |
| Ma03_g17130  | osa:4333201 | 4333201 |
| Ma01_g16340  | osa:4339248 | 4339248 |
| Ma06_g24910  | osa:4339677 | 4339677 |
| Ma04_g00620  | osa:4335984 | 4335984 |
| Ma06_g31540  | osa:4352747 | 4352747 |
| Ma05_g31950  | osa:4351300 | 4351300 |
| Ma09_g07020  | osa:4352058 | 4352058 |
| Ma09_g19150  | osa:4336750 | 4336750 |
| Ma05_g02000  | osa:4334276 | 4334276 |
| Ma04_g07830  | osa:4327859 | 4327859 |
| Novel01203   | osa:4334425 | 4334425 |
| Ma10_g25840  | osa:4332174 | 4332174 |
| Ma08_g14810  | osa:4349044 | 4349044 |
| Ma09_g13580  | osa:4329329 | 4329329 |
| Ma04_g31170  | osa:4349333 | 4349333 |
| Ma07_g24600  | osa:4324933 | 4324933 |
| Ma08_g25460  | osa:4352741 | 4352741 |
| Ma07_g25460  | osa:4325937 | 4325937 |
| Ma08_g02270  | osa:4332054 | 4332054 |
| Ma03_g11520  | osa:4328603 | 4328603 |
| Ma06_g19810  | osa:4338825 | 4338825 |
| Ma08_g09930  | osa:4326818 | 4326818 |
| Ma03_g33110  | osa:4333201 | 4333201 |
| Ma11_g20920  | osa:4348176 | 4348176 |
| Ma04_g04720  | osa:4342117 | 4342117 |
| Ma07_g20920  | osa:4329955 | 4329955 |
| Ma04_g07920  | osa:4324599 | 4324599 |
| Ma03_g05860  | osa:4329701 | 4329701 |
| Ma10_g10490  | osa:4329593 | 4329593 |
| Ma10_g24460  | osa:4330753 | 4330753 |
| Ma01_g03820  | osa:4343453 | 4343453 |
| Ma03_g27120  | osa:4326346 | 4326346 |

|             |             |         |
|-------------|-------------|---------|
| Ma10_g20860 | osa:4336960 | 4336960 |
| Ma05_g31060 | osa:4325211 | 4325211 |
| Ma02_g23910 | osa:4343975 | 4343975 |
| Ma02_g13970 | osa:4328168 | 4328168 |
| Ma04_g13410 | osa:4337284 | 4337284 |
| Ma08_g27570 | osa:4334073 | 4334073 |
| Ma06_g16100 | osa:4341249 | 4341249 |
| Ma07_g22060 | osa:4336146 | 4336146 |
| Ma01_g04250 | osa:4332745 | 4332745 |
| Ma07_g28480 | osa:4352223 | 4352223 |
| Ma10_g08510 | osa:4347717 | 4347717 |
| Ma02_g05120 | osa:4340026 | 4340026 |
| Ma06_g30010 | osa:4344539 | 4344539 |
| Ma06_g10290 | osa:4351300 | 4351300 |
| Ma06_g14670 | osa:4334535 | 4334535 |
| Ma02_g14500 | osa:4352791 | 4352791 |
| Ma10_g24730 | osa:4329733 | 4329733 |
| Ma07_g11500 | osa:4331893 | 4331893 |
| Ma06_g10670 | osa:4347680 | 4347680 |
| Ma05_g29560 | osa:4351119 | 4351119 |
| Ma08_g29310 | osa:4329889 | 4329889 |
| Ma01_g14940 | osa:4331917 | 4331917 |
| Ma06_g37750 | osa:4327647 | 4327647 |
| Ma03_g15100 | osa:4335447 | 4335447 |
| Ma04_g30490 | osa:4343443 | 4343443 |
| Ma02_g18420 | osa:4341321 | 4341321 |
| Ma09_g15520 | osa:4345606 | 4345606 |
| Ma07_g02100 | osa:4337733 | 4337733 |
| Ma05_g05010 | osa:4340725 | 4340725 |
| Ma06_g09160 | osa:4329532 | 4329532 |
| Ma02_g01570 | osa:4334841 | 4334841 |
| Ma09_g08810 | osa:4345212 | 4345212 |
| Ma08_g07480 | osa:4325027 | 4325027 |
| Ma04_g01750 | osa:4330753 | 4330753 |
| Ma07_g28490 | osa:4352223 | 4352223 |
| Ma10_g15940 | osa:4324554 | 4324554 |
| Ma10_g11420 | osa:4335756 | 4335756 |
| Ma07_g11340 | osa:4348582 | 4348582 |
| Ma02_g15160 | osa:4334233 | 4334233 |
| Ma02_g04620 | osa:4340050 | 4340050 |
| Ma02_g23730 | osa:4343910 | 4343910 |
| Ma10_g15780 | osa:4335789 | 4335789 |
| Ma06_g14410 | osa:4337818 | 4337818 |
| Ma02_g03830 | osa:4338750 | 4338750 |
| Ma04_g36700 | osa:4348876 | 4348876 |
| Ma04_g07860 | osa:4327859 | 4327859 |
| Ma07_g06700 | osa:4349111 | 4349111 |
| Ma11_g10950 | osa:4344095 | 4344095 |
| Ma03_g06120 | osa:4340725 | 4340725 |
| Ma08_g04770 | osa:4334003 | 4334003 |
| Ma06_g01540 | osa:4346185 | 4346185 |
| Ma10_g19040 | osa:4330753 | 4330753 |
| Ma05_g20350 | osa:4334308 | 4334308 |
| Ma02_g24020 | osa:4330753 | 4330753 |
| Ma09_g27580 | osa:4345212 | 4345212 |
| Ma04_g10990 | osa:4343681 | 4343681 |
| Ma03_g01820 | osa:4343910 | 4343910 |
| Ma04_g02560 | osa:4333201 | 4333201 |
| Ma04_g12630 | osa:4341663 | 4341663 |
| Ma04_g28070 | osa:4352833 | 4352833 |
| Ma03_g19950 | osa:4327285 | 4327285 |
| Ma10_g10450 | osa:4349835 | 4349835 |
| Ma04_g02250 | osa:4337265 | 4337265 |
| Ma08_g15550 | osa:4351929 | 4351929 |
| Ma03_g28580 | osa:4339885 | 4339885 |
| Ma08_g08880 | osa:4346159 | 4346159 |
| Ma09_g29260 | osa:4340093 | 4340093 |
| Ma10_g20600 | osa:4350636 | 4350636 |
| Ma08_g06070 | osa:4352549 | 4352549 |
| Ma10_g24940 | osa:4347311 | 4347311 |
| Ma05_g10310 | osa:4347262 | 4347262 |
| Ma10_g23920 | osa:4345689 | 4345689 |
| Ma08_g29910 | osa:4350053 | 4350053 |
| Ma05_g23060 | osa:4349318 | 4349318 |
| Novel01419  | osa:4324282 | 4324282 |
| Ma07_g10560 | osa:4327301 | 4327301 |
| Ma04_g26360 | osa:4330302 | 4330302 |
| Ma03_g16070 | osa:4339583 | 4339583 |
| Ma10_g14640 | osa:4331360 | 4331360 |
| Ma05_g25700 | osa:4327423 | 4327423 |
| Ma10_g09000 | osa:4331914 | 4331914 |
| Ma08_g00920 | osa:4337297 | 4337297 |
| Ma04_g20190 | osa:4331295 | 4331295 |
| Ma07_g28080 | osa:4333156 | 4333156 |
| Ma11_g15760 | osa:4343080 | 4343080 |
| Ma06_g10250 | osa:4338409 | 4338409 |
| Ma06_g29250 | osa:4332041 | 4332041 |

|             |             |         |
|-------------|-------------|---------|
| Ma06_g09780 | osa:4350636 | 4350636 |
| Ma10_g12550 | osa:4336044 | 4336044 |
| Ma05_g26380 | osa:4347160 | 4347160 |
| Ma05_g27700 | osa:4336216 | 4336216 |
| Ma09_g01600 | osa:4350455 | 4350455 |
| Ma04_g19680 | osa:4333020 | 4333020 |
| Ma07_g11510 | osa:4331893 | 4331893 |
| Ma03_g12070 | osa:4331418 | 4331418 |
| Ma03_g05400 | osa:4329329 | 4329329 |
| Ma05_g20810 | osa:4332477 | 4332477 |
| Ma09_g24170 | osa:4337437 | 4337437 |
| Ma04_g25940 | osa:4345286 | 4345286 |
| Ma11_g17540 | osa:4336216 | 4336216 |
| Ma06_g23970 | osa:4326635 | 4326635 |
| Ma10_g21000 | osa:4325336 | 4325336 |
| Ma06_g38960 | osa:4336353 | 4336353 |
| Ma09_g02110 | osa:4336216 | 4336216 |
| Ma05_g08470 | osa:4334266 | 4334266 |
| Ma03_g21060 | osa:4330649 | 4330649 |
| Ma11_g04940 | osa:4348304 | 4348304 |
| Ma10_g20580 | osa:4350636 | 4350636 |
| Ma03_g23680 | osa:4324793 | 4324793 |
| Ma11_g21360 | osa:4330184 | 4330184 |
| Ma11_g19670 | osa:4334994 | 4334994 |
| Ma01_g16200 | osa:4332563 | 4332563 |
| Ma10_g26480 | osa:4351226 | 4351226 |
| Ma06_g30380 | osa:4329938 | 4329938 |
| Ma04_g27940 | osa:4334101 | 4334101 |
| Ma11_g07780 | osa:4341713 | 4341713 |
| Ma00_g01820 | osa:4330439 | 4330439 |
| Ma08_g23170 | osa:4345722 | 4345722 |
| Ma05_g05050 | osa:4340042 | 4340042 |
| Ma05_g22300 | osa:4349897 | 4349897 |
| Ma03_g03400 | osa:4341249 | 4341249 |
| Ma10_g26890 | osa:4327647 | 4327647 |
| Ma07_g01260 | osa:4333566 | 4333566 |
| Ma05_g18380 | osa:4337563 | 4337563 |
| Ma11_g24010 | osa:4328439 | 4328439 |
| Ma09_g25530 | osa:4325633 | 4325633 |
| Ma05_g27130 | osa:4328684 | 4328684 |
| Ma05_g13480 | osa:4349333 | 4349333 |
| Ma04_g18600 | osa:4331075 | 4331075 |
| Ma06_g16060 | osa:4341249 | 4341249 |
| Ma07_g28990 | osa:4342690 | 4342690 |
| Ma06_g17860 | osa:4324261 | 4324261 |
| Ma08_g04460 | osa:4340334 | 4340334 |
| Novel01453  | osa:6450140 | 6450140 |
| Ma06_g35980 | osa:4332375 | 4332375 |
| Ma00_g01500 | osa:4351694 | 4351694 |
| Ma01_g14880 | osa:4343946 | 4343946 |
| Ma03_g07150 | osa:4347265 | 4347265 |
| Ma03_g29220 | osa:4341663 | 4341663 |
| Ma09_g23510 | osa:4341751 | 4341751 |
| Ma02_g15890 | osa:4343443 | 4343443 |
| Ma06_g19820 | osa:4350171 | 4350171 |
| Ma08_g16120 | osa:4349897 | 4349897 |
| Ma04_g20070 | osa:4349333 | 4349333 |
| Ma07_g12740 | osa:4349723 | 4349723 |
| Ma03_g32890 | osa:4326769 | 4326769 |
| Ma10_g12210 | osa:4350591 | 4350591 |
| Ma04_g05290 | osa:4351300 | 4351300 |
| Ma02_g11180 | osa:4339425 | 4339425 |
| Ma04_g22000 | osa:4335737 | 4335737 |
| Ma03_g21780 | osa:4339546 | 4339546 |
| Ma05_g23890 | osa:4338560 | 4338560 |
| Ma05_g16030 | osa:4343288 | 4343288 |
| Ma03_g13910 | osa:4346726 | 4346726 |
| Ma00_g05010 | osa:4335335 | 4335335 |
| Ma10_g13290 | osa:4344386 | 4344386 |
| Ma04_g13550 | osa:4335430 | 4335430 |
| Ma03_g33280 | osa:4339675 | 4339675 |
| Ma01_g07600 | osa:4334073 | 4334073 |
| Ma06_g21190 | osa:4337048 | 4337048 |
| Ma06_g08980 | osa:4351698 | 4351698 |
| Ma06_g19750 | osa:4344496 | 4344496 |
| Ma01_g08380 | osa:4347745 | 4347745 |
| Ma09_g19460 | osa:4342702 | 4342702 |
| Ma01_g07340 | osa:4339593 | 4339593 |
| Ma08_g34680 | osa:4328991 | 4328991 |
| Novel00240  | osa:4337230 | 4337230 |
| Ma06_g30180 | osa:4350358 | 4350358 |
| Ma09_g11280 | osa:4348138 | 4348138 |
| Ma04_g11720 | osa:4347802 | 4347802 |
| Ma06_g32150 | osa:4329733 | 4329733 |
| Ma10_g25720 | osa:4345657 | 4345657 |
| Ma05_g15910 | osa:4333177 | 4333177 |
| Ma06_g09580 | osa:4346136 | 4346136 |

|             |             |         |
|-------------|-------------|---------|
| Ma10_g21340 | osa:4338007 | 4338007 |
| Ma06_g21100 | osa:4337051 | 4337051 |
| Ma06_g28550 | osa:4345387 | 4345387 |
| Ma06_g21530 | osa:4325444 | 4325444 |
| Ma08_g23400 | osa:4331824 | 4331824 |
| Ma05_g01630 | osa:4352670 | 4352670 |
| Ma10_g14420 | osa:4338088 | 4338088 |
| Ma09_g20960 | osa:4335447 | 4335447 |
| Ma03_g01410 | osa:9268279 | 9268279 |
| Ma09_g03520 | osa:4332372 | 4332372 |
| Ma08_g16510 | osa:4331854 | 4331854 |
| Ma09_g28900 | osa:4338045 | 4338045 |
| Ma03_g25580 | osa:4351119 | 4351119 |
| Ma04_g29400 | osa:4333566 | 4333566 |
| Ma10_g27460 | osa:4327329 | 4327329 |
| Ma06_g14400 | osa:4337818 | 4337818 |
| Ma08_g34870 | osa:4352536 | 4352536 |
| Ma10_g20560 | osa:4350636 | 4350636 |
| Ma06_g16830 | osa:4324526 | 4324526 |
| Ma04_g11650 | osa:4324809 | 4324809 |
| Ma09_g26210 | osa:4352839 | 4352839 |
| Ma03_g06130 | osa:4340240 | 4340240 |
| Ma05_g01700 | osa:4346642 | 4346642 |
| Novel01132  | osa:4324282 | 4324282 |
| Ma04_g31940 | osa:4330090 | 4330090 |
| Ma04_g10090 | osa:4326266 | 4326266 |
| Ma06_g27690 | osa:4351671 | 4351671 |
| Ma06_g08130 | osa:4352058 | 4352058 |
| Ma00_g01810 | osa:4330439 | 4330439 |
| Ma09_g25040 | osa:4343570 | 4343570 |
| Ma05_g12640 | osa:4349006 | 4349006 |
| Ma06_g35790 | osa:4324810 | 4324810 |
| Ma08_g29090 | osa:4336162 | 4336162 |
| Ma05_g05920 | osa:4340090 | 4340090 |
| Ma09_g29570 | osa:4329101 | 4329101 |
| Ma07_g11670 | osa:4333862 | 4333862 |
| Ma02_g04920 | osa:4341861 | 4341861 |
| Ma07_g18790 | osa:4347745 | 4347745 |
| Ma08_g28360 | osa:4324621 | 4324621 |
| Ma08_g14010 | osa:4331515 | 4331515 |
| Ma05_g10890 | osa:4334626 | 4334626 |
| Ma05_g08040 | osa:4347265 | 4347265 |
| Ma02_g18360 | osa:4327301 | 4327301 |
| Ma08_g21280 | osa:4329007 | 4329007 |
| Ma03_g04640 | osa:4329955 | 4329955 |
| Ma09_g14520 | osa:4347311 | 4347311 |
| Ma06_g01670 | osa:4338802 | 4338802 |
| Ma09_g31420 | osa:4347851 | 4347851 |
| Ma08_g14830 | osa:4332286 | 4332286 |
| Ma01_g03570 | osa:4340042 | 4340042 |
| Ma04_g13500 | osa:4324151 | 4324151 |
| Ma09_g23330 | osa:4328485 | 4328485 |
| Ma08_g02250 | osa:4332372 | 4332372 |
| Ma02_g24860 | osa:4350636 | 4350636 |
| Ma11_g24380 | osa:4331065 | 4331065 |
| Ma05_g30490 | osa:4332519 | 4332519 |
| Ma05_g23990 | osa:4329497 | 4329497 |
| Ma04_g35390 | osa:4349454 | 4349454 |
| Ma03_g00730 | osa:9266710 | 9266710 |
| Ma02_g20460 | osa:4349333 | 4349333 |
| Ma08_g19500 | osa:4335756 | 4335756 |
| Ma06_g12620 | osa:4334188 | 4334188 |
| Ma03_g13760 | osa:4334994 | 4334994 |
| Ma06_g07590 | osa:4333918 | 4333918 |
| Ma06_g26610 | osa:4331941 | 4331941 |
| Ma02_g14780 | osa:4333566 | 4333566 |
| Ma08_g00910 | osa:4346094 | 4346094 |
| Ma10_g21240 | osa:4338045 | 4338045 |
| Ma09_g03480 | osa:4342171 | 4342171 |
| Ma01_g02270 | osa:4342142 | 4342142 |
| Ma06_g24830 | osa:3131463 | 3131463 |
| Ma09_g19700 | osa:4345078 | 4345078 |
| Ma07_g22000 | osa:4345962 | 4345962 |
| Ma09_g08110 | osa:4350053 | 4350053 |
| Ma02_g22720 | osa:4340485 | 4340485 |
| Ma08_g29610 | osa:4329692 | 4329692 |
| Ma04_g18460 | osa:4330975 | 4330975 |
| Ma03_g05380 | osa:4329324 | 4329324 |
| Ma01_g19240 | osa:4341792 | 4341792 |
| Ma05_g18650 | osa:4329532 | 4329532 |
| Ma03_g31530 | osa:4352146 | 4352146 |
| Ma04_g01300 | osa:4352871 | 4352871 |
| Ma06_g35590 | osa:4333719 | 4333719 |
| Novel00441  | osa:4341792 | 4341792 |
| Ma10_g05100 | osa:4326901 | 4326901 |
| Ma09_g03470 | osa:4332375 | 4332375 |
| Ma10_g16460 | osa:4324962 | 4324962 |



|             |             |         |
|-------------|-------------|---------|
| Ma03_g32060 | osa:4334116 | 4334116 |
| Ma11_g23980 | osa:4344934 | 4344934 |
| Ma08_g13290 | osa:4330077 | 4330077 |
| Ma07_g26160 | osa:4326680 | 4326680 |
| Ma09_g03450 | osa:4332375 | 4332375 |
| Ma09_g14110 | osa:4341997 | 4341997 |
| Ma01_g14700 | osa:4345605 | 4345605 |
| Ma08_g33410 | osa:4335756 | 4335756 |
| Ma10_g07330 | osa:4341713 | 4341713 |
| Ma07_g06750 | osa:4328012 | 4328012 |
| Ma08_g04900 | osa:4332153 | 4332153 |
| Ma03_g00940 | osa:4346459 | 4346459 |
| Ma09_g24200 | osa:4349012 | 4349012 |
| Ma11_g07790 | osa:4337230 | 4337230 |
| Ma04_g38880 | osa:4334233 | 4334233 |
| Ma09_g21880 | osa:4339535 | 4339535 |
| Ma01_g21440 | osa:4347520 | 4347520 |
| Ma05_g03450 | osa:4330413 | 4330413 |
| Ma09_g31410 | osa:4347851 | 4347851 |
| Ma03_g16830 | osa:4340025 | 4340025 |
| Ma11_g24610 | osa:4350636 | 4350636 |
| Ma08_g32440 | osa:4337265 | 4337265 |
| Ma07_g02270 | osa:4345762 | 4345762 |
| Ma07_g06760 | osa:4328012 | 4328012 |
| Ma08_g25110 | osa:4336146 | 4336146 |
| Ma04_g39070 | osa:4352670 | 4352670 |
| Ma05_g13530 | osa:4344268 | 4344268 |
| Ma01_g00130 | osa:4346656 | 4346656 |
| Ma07_g09040 | osa:4341325 | 4341325 |
| Ma09_g06900 | osa:4332041 | 4332041 |
| Ma06_g22930 | osa:3131406 | 3131406 |
| Ma04_g09570 | osa:4352741 | 4352741 |
| Ma04_g18630 | osa:4330910 | 4330910 |
| Ma10_g27820 | osa:4341247 | 4341247 |
| Ma05_g14980 | osa:4342614 | 4342614 |
| Ma04_g06200 | osa:4342996 | 4342996 |
| Ma03_g01840 | osa:4343908 | 4343908 |
| Ma11_g21180 | osa:4336415 | 4336415 |
| Ma09_g06650 | osa:4339718 | 4339718 |
| Ma09_g12090 | osa:4345994 | 4345994 |
| Ma03_g13720 | osa:4331150 | 4331150 |
| Ma06_g14370 | osa:4337818 | 4337818 |
| Ma11_g05360 | osa:4338560 | 4338560 |
| Ma09_g12560 | osa:4330753 | 4330753 |
| Ma05_g23550 | osa:4344180 | 4344180 |
| Ma06_g00500 | osa:4328118 | 4328118 |
| Ma06_g01700 | osa:4324914 | 4324914 |
| Ma10_g17260 | osa:4343523 | 4343523 |
| Ma04_g37240 | osa:4327731 | 4327731 |
| Ma11_g19280 | osa:4344045 | 4344045 |
| Ma06_g14390 | osa:4337818 | 4337818 |
| Ma11_g08300 | osa:4336216 | 4336216 |
| Ma03_g05660 | osa:4345722 | 4345722 |
| Ma02_g07020 | osa:4347074 | 4347074 |
| Ma07_g24940 | osa:4344470 | 4344470 |
| Ma04_g26260 | osa:4346217 | 4346217 |
| Ma04_g39490 | osa:4331021 | 4331021 |
| Ma09_g07380 | osa:4332341 | 4332341 |
| Ma06_g24480 | osa:4332771 | 4332771 |
| Ma11_g21050 | osa:4330016 | 4330016 |
| Ma01_g10240 | osa:4324933 | 4324933 |
| Ma05_g09350 | osa:4339457 | 4339457 |
| Ma11_g15660 | osa:4348804 | 4348804 |
| Ma08_g25440 | osa:4328260 | 4328260 |
| Ma08_g28170 | osa:4324655 | 4324655 |
| Ma01_g04420 | osa:4336415 | 4336415 |
| Ma07_g09220 | osa:4341249 | 4341249 |
| Ma09_g30120 | osa:4337482 | 4337482 |
| Ma10_g23010 | osa:4337696 | 4337696 |
| Ma06_g13460 | osa:4352042 | 4352042 |
| Ma09_g13000 | osa:4347103 | 4347103 |
| Ma08_g11970 | osa:4336753 | 4336753 |
| Ma11_g17480 | osa:4351008 | 4351008 |
| Ma01_g08090 | osa:4327647 | 4327647 |
| Ma09_g25700 | osa:4340240 | 4340240 |
| Ma03_g16650 | osa:4339812 | 4339812 |
| Ma03_g26140 | osa:4338768 | 4338768 |
| Ma09_g20570 | osa:4337406 | 4337406 |
| Ma09_g15420 | osa:4331824 | 4331824 |
| Ma06_g15020 | osa:4351698 | 4351698 |
| Ma05_g16190 | osa:4331917 | 4331917 |
| Ma08_g05120 | osa:4342988 | 4342988 |
| Ma03_g11800 | osa:4346529 | 4346529 |
| Ma11_g23060 | osa:4343164 | 4343164 |
| Ma10_g15800 | osa:4335789 | 4335789 |
| Ma09_g31400 | osa:4348690 | 4348690 |
| Ma03_g32130 | osa:4334101 | 4334101 |

|                                         |    |    |                |                |             |             |         |  |  |
|-----------------------------------------|----|----|----------------|----------------|-------------|-------------|---------|--|--|
|                                         |    |    |                |                | Ma04_g39130 | osa:4334171 | 4334171 |  |  |
|                                         |    |    |                |                | Ma06_g29240 | osa:4332041 | 4332041 |  |  |
|                                         |    |    |                |                | Ma04_g03820 | osa:4335430 | 4335430 |  |  |
|                                         |    |    |                |                | Ma11_g19510 | osa:4330104 | 4330104 |  |  |
|                                         |    |    |                |                | Ma03_g03600 | osa:4328168 | 4328168 |  |  |
|                                         |    |    |                |                | Ma06_g25950 | osa:4334104 | 4334104 |  |  |
|                                         |    |    |                |                | Novel01373  | osa:4339846 | 4339846 |  |  |
|                                         |    |    |                |                | Ma08_g30510 | osa:4344267 | 4344267 |  |  |
|                                         |    |    |                |                | Ma04_g23230 | osa:4348834 | 4348834 |  |  |
|                                         |    |    |                |                | Ma09_g12600 | osa:4330747 | 4330747 |  |  |
|                                         |    |    |                |                | Ma03_g07770 | osa:4331824 | 4331824 |  |  |
|                                         |    |    |                |                | Ma03_g14250 | osa:4346337 | 4346337 |  |  |
|                                         |    |    |                |                | Ma10_g18010 | osa:4333888 | 4333888 |  |  |
|                                         |    |    |                |                | Ma05_g14380 | osa:4332274 | 4332274 |  |  |
|                                         |    |    |                |                | Ma08_g23180 | osa:4332788 | 4332788 |  |  |
|                                         |    |    |                |                | Ma06_g12590 | osa:4352649 | 4352649 |  |  |
|                                         |    |    |                |                | Ma08_g27070 | osa:4332134 | 4332134 |  |  |
|                                         |    |    |                |                | Ma09_g31020 | osa:4344899 | 4344899 |  |  |
|                                         |    |    |                |                | Ma06_g27120 | osa:4329593 | 4329593 |  |  |
|                                         |    |    |                |                | Ma05_g06070 | osa:4339793 | 4339793 |  |  |
|                                         |    |    |                |                | Ma11_g14310 | osa:4326794 | 4326794 |  |  |
|                                         |    |    |                |                | Ma11_g08450 | osa:4324962 | 4324962 |  |  |
|                                         |    |    |                |                | Ma10_g18940 | osa:4331779 | 4331779 |  |  |
|                                         |    |    |                |                | Ma11_g03900 | osa:4330104 | 4330104 |  |  |
|                                         |    |    |                |                | Ma07_g11010 | osa:4346981 | 4346981 |  |  |
|                                         |    |    |                |                | Ma08_g20550 | osa:4343598 | 4343598 |  |  |
|                                         |    |    |                |                | Ma03_g02590 | osa:4352615 | 4352615 |  |  |
|                                         |    |    |                |                | Ma08_g15070 | osa:4348230 | 4348230 |  |  |
|                                         |    |    |                |                | Ma11_g14380 | osa:4344268 | 4344268 |  |  |
|                                         |    |    |                |                | Ma05_g18090 | osa:4344854 | 4344854 |  |  |
|                                         |    |    |                |                | Ma09_g23530 | osa:4336928 | 4336928 |  |  |
|                                         |    |    |                |                | Ma07_g13520 | osa:4327301 | 4327301 |  |  |
|                                         |    |    |                |                | Ma04_g25530 | osa:4331130 | 4331130 |  |  |
|                                         |    |    |                |                | Ma03_g10630 | osa:4351695 | 4351695 |  |  |
|                                         |    |    |                |                | Ma01_g17210 | osa:4330737 | 4330737 |  |  |
|                                         |    |    |                |                | Ma10_g12270 | osa:4350614 | 4350614 |  |  |
|                                         |    |    |                |                | Ma10_g17250 | osa:4342517 | 4342517 |  |  |
|                                         |    |    |                |                | Ma05_g15200 | osa:4349333 | 4349333 |  |  |
|                                         |    |    |                |                | Ma09_g08470 | osa:4329593 | 4329593 |  |  |
|                                         |    |    |                |                | Ma03_g16840 | osa:4340025 | 4340025 |  |  |
|                                         |    |    |                |                | Ma03_g06970 | osa:4330843 | 4330843 |  |  |
|                                         |    |    |                |                | Ma11_g13600 | osa:4332563 | 4332563 |  |  |
|                                         |    |    |                |                | Ma06_g28940 | osa:4339718 | 4339718 |  |  |
|                                         |    |    |                |                | Ma10_g09700 | osa:4334425 | 4334425 |  |  |
|                                         |    |    |                |                | Ma03_g26340 | osa:4339675 | 4339675 |  |  |
|                                         |    |    |                |                | Ma08_g10630 | osa:4337732 | 4337732 |  |  |
|                                         |    |    |                |                | Ma06_g22100 | osa:4350524 | 4350524 |  |  |
|                                         |    |    |                |                | Ma06_g26480 | osa:4334196 | 4334196 |  |  |
|                                         |    |    |                |                | Ma10_g15370 | osa:4324599 | 4324599 |  |  |
|                                         |    |    |                |                | Ma01_g17990 | osa:4343721 | 4343721 |  |  |
|                                         |    |    |                |                | Ma03_g02700 | osa:4337818 | 4337818 |  |  |
|                                         |    |    |                |                | Ma07_g11120 | osa:4332174 | 4332174 |  |  |
|                                         |    |    |                |                | Ma10_g26330 | osa:4327178 | 4327178 |  |  |
|                                         |    |    |                |                | Ma02_g20450 | osa:4349333 | 4349333 |  |  |
|                                         |    |    |                |                | Ma02_g12240 | osa:4330164 | 4330164 |  |  |
|                                         |    |    |                |                | Ma04_g40060 | osa:4325861 | 4325861 |  |  |
|                                         |    |    |                |                | Ma03_g01370 | osa:4325687 | 4325687 |  |  |
|                                         |    |    |                |                | Ma05_g11820 | osa:4349012 | 4349012 |  |  |
|                                         |    |    |                |                | Ma01_g03420 | osa:4340008 | 4340008 |  |  |
|                                         |    |    |                |                | Ma09_g24600 | osa:4347691 | 4347691 |  |  |
|                                         |    |    |                |                | Ma04_g31640 | osa:4343366 | 4343366 |  |  |
|                                         |    |    |                |                | Ma03_g08830 | osa:4344231 | 4344231 |  |  |
|                                         |    |    |                |                | Ma10_g11950 | osa:4326465 | 4326465 |  |  |
|                                         |    |    |                |                | Ma04_g26280 | osa:4346217 | 4346217 |  |  |
|                                         |    |    |                |                | Ma05_g22240 | osa:4343249 | 4343249 |  |  |
|                                         |    |    |                |                | Ma06_g16590 | osa:4324619 | 4324619 |  |  |
|                                         |    |    |                |                | Ma03_g17510 | osa:4339892 | 4339892 |  |  |
|                                         |    |    |                |                | Ma03_g09880 | osa:4332519 | 4332519 |  |  |
|                                         |    |    |                |                | Ma02_g09950 | osa:4350053 | 4350053 |  |  |
|                                         |    |    |                |                | Ma10_g29140 | osa:4339127 | 4339127 |  |  |
|                                         |    |    |                |                | Ma02_g10050 | osa:4351610 | 4351610 |  |  |
|                                         |    |    |                |                | Ma11_g02800 | osa:4336753 | 4336753 |  |  |
|                                         |    |    |                |                | Ma10_g12590 | osa:4329518 | 4329518 |  |  |
|                                         |    |    |                |                | Ma08_g04450 | osa:4348656 | 4348656 |  |  |
|                                         |    |    |                |                | Ma03_g21800 | osa:4339554 | 4339554 |  |  |
|                                         |    |    |                |                | Ma10_g18290 | osa:4352146 | 4352146 |  |  |
|                                         |    |    |                |                | Ma04_g18600 | osa:4331075 | 4331075 |  |  |
|                                         |    |    |                |                | Ma06_g19820 | osa:4350171 | 4350171 |  |  |
|                                         |    |    |                |                | Ma00_g01820 | osa:4330439 | 4330439 |  |  |
|                                         |    |    |                |                | Ma04_g36700 | osa:4348876 | 4348876 |  |  |
|                                         |    |    |                |                | Ma03_g01410 | osa:9268279 | 9268279 |  |  |
|                                         |    |    |                |                | Ma00_g01810 | osa:4330439 | 4330439 |  |  |
|                                         |    |    |                |                | Ma10_g12210 | osa:4350591 | 4350591 |  |  |
|                                         |    |    |                |                | Ma11_g19510 | osa:4330104 | 4330104 |  |  |
|                                         |    |    |                |                | Ma11_g03900 | osa:4330104 | 4330104 |  |  |
|                                         |    |    |                |                | Ma05_g14380 | osa:4332274 | 4332274 |  |  |
| <a href="#">Sphingolipid metabolism</a> | 12 | 22 | 0.105698179473 | 0.618522934881 |             |             |         |  |  |

|  |  |  |  |  |             |             |         |  |  |
|--|--|--|--|--|-------------|-------------|---------|--|--|
|  |  |  |  |  | Ma05_g09350 | osa:4339457 | 4339457 |  |  |
|  |  |  |  |  | Ma07_g26160 | osa:4326680 | 4326680 |  |  |
|  |  |  |  |  | Ma08_g07480 | osa:4325027 | 4325027 |  |  |
|  |  |  |  |  | Ma04_g04160 | osa:4337230 | 4337230 |  |  |
|  |  |  |  |  | Ma10_g28640 | osa:4340677 | 4340677 |  |  |
|  |  |  |  |  | Ma11_g08300 | osa:4336216 | 4336216 |  |  |
|  |  |  |  |  | Ma07_g11340 | osa:4348582 | 4348582 |  |  |
|  |  |  |  |  | Novel00240  | osa:4337230 | 4337230 |  |  |
|  |  |  |  |  | Ma02_g03830 | osa:4338750 | 4338750 |  |  |
|  |  |  |  |  | Ma10_g25720 | osa:4345657 | 4345657 |  |  |
|  |  |  |  |  | Ma11_g21050 | osa:4330016 | 4330016 |  |  |
|  |  |  |  |  | Ma10_g21340 | osa:4338007 | 4338007 |  |  |
|  |  |  |  |  | Ma06_g21100 | osa:4337051 | 4337051 |  |  |
|  |  |  |  |  | Ma06_g28550 | osa:4345387 | 4345387 |  |  |
|  |  |  |  |  | Ma11_g14450 | osa:4352839 | 4352839 |  |  |
|  |  |  |  |  | Ma08_g28170 | osa:4324655 | 4324655 |  |  |
|  |  |  |  |  | Ma03_g03600 | osa:4328168 | 4328168 |  |  |
|  |  |  |  |  | Ma08_g15550 | osa:4351929 | 4351929 |  |  |
|  |  |  |  |  | Ma09_g26210 | osa:4352839 | 4352839 |  |  |
|  |  |  |  |  | Ma08_g08880 | osa:4346159 | 4346159 |  |  |
|  |  |  |  |  | Ma05_g00310 | osa:4341792 | 4341792 |  |  |
|  |  |  |  |  | Ma04_g28920 | osa:4342610 | 4342610 |  |  |
|  |  |  |  |  | Ma09_g20570 | osa:4337406 | 4337406 |  |  |
|  |  |  |  |  | Ma07_g11510 | osa:4331893 | 4331893 |  |  |
|  |  |  |  |  | Ma05_g07850 | osa:4326513 | 4326513 |  |  |
|  |  |  |  |  | Ma06_g08130 | osa:4352058 | 4352058 |  |  |
|  |  |  |  |  | Ma08_g05120 | osa:4342988 | 4342988 |  |  |
|  |  |  |  |  | Ma08_g03130 | osa:4333898 | 4333898 |  |  |
|  |  |  |  |  | Ma07_g10560 | osa:4327301 | 4327301 |  |  |
|  |  |  |  |  | Ma03_g32130 | osa:4334101 | 4334101 |  |  |
|  |  |  |  |  | Ma03_g27870 | osa:4347691 | 4347691 |  |  |
|  |  |  |  |  | Ma05_g25700 | osa:4327423 | 4327423 |  |  |
|  |  |  |  |  | Ma09_g07280 | osa:4329858 | 4329858 |  |  |
|  |  |  |  |  | Ma04_g03820 | osa:4335430 | 4335430 |  |  |
|  |  |  |  |  | Ma08_g33830 | osa:4328446 | 4328446 |  |  |
|  |  |  |  |  | Ma02_g18360 | osa:4327301 | 4327301 |  |  |
|  |  |  |  |  | Ma05_g21880 | osa:4335048 | 4335048 |  |  |
|  |  |  |  |  | Ma09_g14520 | osa:4347311 | 4347311 |  |  |
|  |  |  |  |  | Ma03_g14310 | osa:4346332 | 4346332 |  |  |
|  |  |  |  |  | Ma01_g03570 | osa:4340042 | 4340042 |  |  |
|  |  |  |  |  | Ma11_g16750 | osa:4341770 | 4341770 |  |  |
|  |  |  |  |  | Ma10_g12550 | osa:4336044 | 4336044 |  |  |
|  |  |  |  |  | Ma04_g33980 | osa:4330413 | 4330413 |  |  |
|  |  |  |  |  | Ma08_g30510 | osa:4344267 | 4344267 |  |  |
|  |  |  |  |  | Ma05_g27700 | osa:4336216 | 4336216 |  |  |
|  |  |  |  |  | Ma04_g35390 | osa:4349454 | 4349454 |  |  |
|  |  |  |  |  | Ma02_g08140 | osa:4350964 | 4350964 |  |  |
|  |  |  |  |  | Ma09_g12600 | osa:4330747 | 4330747 |  |  |
|  |  |  |  |  | Ma06_g01900 | osa:4341792 | 4341792 |  |  |
|  |  |  |  |  | Ma06_g26610 | osa:4331941 | 4331941 |  |  |
|  |  |  |  |  | Ma05_g31060 | osa:4325211 | 4325211 |  |  |
|  |  |  |  |  | Ma03_g17510 | osa:4339892 | 4339892 |  |  |
|  |  |  |  |  | Ma06_g38960 | osa:4336353 | 4336353 |  |  |
|  |  |  |  |  | Ma09_g02110 | osa:4336216 | 4336216 |  |  |
|  |  |  |  |  | Ma06_g24830 | osa:3131463 | 3131463 |  |  |
|  |  |  |  |  | Novel00760  | osa:4324442 | 4324442 |  |  |
|  |  |  |  |  | Ma07_g22000 | osa:4345962 | 4345962 |  |  |
|  |  |  |  |  | Ma09_g07020 | osa:4352058 | 4352058 |  |  |
|  |  |  |  |  | Ma01_g19240 | osa:4341792 | 4341792 |  |  |
|  |  |  |  |  | Ma04_g01300 | osa:4352871 | 4352871 |  |  |
|  |  |  |  |  | Ma04_g27940 | osa:4334101 | 4334101 |  |  |
|  |  |  |  |  | Ma11_g07780 | osa:4341713 | 4341713 |  |  |
|  |  |  |  |  | Ma07_g13520 | osa:4327301 | 4327301 |  |  |
|  |  |  |  |  | Ma04_g25530 | osa:4331130 | 4331130 |  |  |
|  |  |  |  |  | Ma05_g05050 | osa:4340042 | 4340042 |  |  |
|  |  |  |  |  | Ma05_g22300 | osa:4349897 | 4349897 |  |  |
|  |  |  |  |  | Ma08_g16120 | osa:4349897 | 4349897 |  |  |
|  |  |  |  |  | Ma11_g20920 | osa:4348176 | 4348176 |  |  |
|  |  |  |  |  | Novel00441  | osa:4341792 | 4341792 |  |  |
|  |  |  |  |  | Ma10_g07330 | osa:4341713 | 4341713 |  |  |
|  |  |  |  |  | Ma11_g07790 | osa:4337230 | 4337230 |  |  |
|  |  |  |  |  | Ma01_g17610 | osa:4337406 | 4337406 |  |  |
|  |  |  |  |  | Ma02_g13970 | osa:4328168 | 4328168 |  |  |
|  |  |  |  |  | Ma05_g03450 | osa:4330413 | 4330413 |  |  |
|  |  |  |  |  | Ma10_g24940 | osa:4347311 | 4347311 |  |  |
|  |  |  |  |  | Ma03_g16830 | osa:4340025 | 4340025 |  |  |
|  |  |  |  |  | Ma11_g17540 | osa:4336216 | 4336216 |  |  |
|  |  |  |  |  | Ma09_g24600 | osa:4347691 | 4347691 |  |  |
|  |  |  |  |  | Ma07_g15870 | osa:4328326 | 4328326 |  |  |
|  |  |  |  |  | Ma07_g11500 | osa:4331893 | 4331893 |  |  |
|  |  |  |  |  | Ma07_g12740 | osa:4349723 | 4349723 |  |  |
|  |  |  |  |  | Ma03_g32890 | osa:4326769 | 4326769 |  |  |
|  |  |  |  |  | Ma08_g29310 | osa:4329889 | 4329889 |  |  |
|  |  |  |  |  | Ma02_g11180 | osa:4339425 | 4339425 |  |  |
|  |  |  |  |  | Ma02_g18420 | osa:4341321 | 4341321 |  |  |
|  |  |  |  |  | Ma10_g12590 | osa:4329518 | 4329518 |  |  |

[Carbon metabolism](#)

86

225

0.108422165896

0.618522934881

|                                                             |    |    |                |                |                                                                                                                                                                                                                                                                                                                                                                                                                                                                                                            |                                                                                                                                                                                                                                                                                                                                                                                                                                                                                                             |                                                                                                                                                                                                                                                                                                                                                                         |  |  |
|-------------------------------------------------------------|----|----|----------------|----------------|------------------------------------------------------------------------------------------------------------------------------------------------------------------------------------------------------------------------------------------------------------------------------------------------------------------------------------------------------------------------------------------------------------------------------------------------------------------------------------------------------------|-------------------------------------------------------------------------------------------------------------------------------------------------------------------------------------------------------------------------------------------------------------------------------------------------------------------------------------------------------------------------------------------------------------------------------------------------------------------------------------------------------------|-------------------------------------------------------------------------------------------------------------------------------------------------------------------------------------------------------------------------------------------------------------------------------------------------------------------------------------------------------------------------|--|--|
|                                                             |    |    |                |                | Ma04_g13550<br>Ma03_g16840                                                                                                                                                                                                                                                                                                                                                                                                                                                                                 | osa:4335430<br>osa:4340025                                                                                                                                                                                                                                                                                                                                                                                                                                                                                  | 4335430<br>4340025                                                                                                                                                                                                                                                                                                                                                      |  |  |
| <a href="#">Histidine metabolism</a>                        | 9  | 15 | 0.10962965231  | 0.618522934881 | Ma10_g10490<br>Ma06_g27120<br>Ma06_g17860<br>Ma09_g08470<br>Ma09_g09840<br>Ma05_g05010<br>Novel01132<br>Ma03_g06120<br>Novel01419                                                                                                                                                                                                                                                                                                                                                                          | osa:4329593<br>osa:4329593<br>osa:4324261<br>osa:4329593<br>osa:4324282<br>osa:4340725<br>osa:4324282<br>osa:4340725<br>osa:4324282                                                                                                                                                                                                                                                                                                                                                                         | 4329593<br>4329593<br>4324261<br>4329593<br>4324282<br>4340725<br>4324282<br>4340725<br>4324282                                                                                                                                                                                                                                                                         |  |  |
| <a href="#">Carbon fixation in photosynthetic organisms</a> | 33 | 77 | 0.110094955804 | 0.618522934881 | Ma08_g07480<br>Ma05_g03450<br>Ma03_g16830<br>Ma11_g17540<br>Ma11_g08300<br>Ma06_g28550<br>Ma01_g19240<br>Ma03_g27870<br>Ma02_g03830<br>Ma05_g25700<br>Ma10_g25720<br>Ma04_g03820<br>Ma04_g01300<br>Ma09_g24600<br>Ma10_g21340<br>Novel00441<br>Ma03_g14310<br>Ma11_g16750<br>Ma05_g22300<br>Ma03_g32890<br>Ma08_g16120<br>Ma10_g12550<br>Ma04_g33980<br>Ma05_g27700<br>Ma03_g16840<br>Ma06_g01900<br>Ma08_g33830<br>Ma05_g31060<br>Ma05_g00310<br>Ma07_g15870<br>Ma09_g02110<br>Ma04_g13550<br>Ma06_g24830 | osa:4325027<br>osa:4330413<br>osa:4340025<br>osa:4336216<br>osa:4336216<br>osa:4345387<br>osa:4341792<br>osa:4347691<br>osa:4338750<br>osa:4327423<br>osa:4345657<br>osa:4335430<br>osa:4352871<br>osa:4347691<br>osa:4338007<br>osa:4341792<br>osa:4346332<br>osa:4341770<br>osa:4349897<br>osa:4326769<br>osa:4349897<br>osa:4336044<br>osa:4330413<br>osa:4336216<br>osa:4340025<br>osa:4341792<br>osa:4328446<br>osa:4325211<br>osa:4341792<br>osa:4328326<br>osa:4336216<br>osa:4335430<br>osa:3131463 | 4325027<br>4330413<br>4340025<br>4336216<br>4336216<br>4345387<br>4341792<br>4347691<br>4338750<br>4327423<br>4345657<br>4335430<br>4352871<br>4347691<br>4338007<br>4341792<br>4346332<br>4341770<br>4349897<br>4326769<br>4349897<br>4336044<br>4330413<br>4336216<br>4340025<br>4341792<br>4328446<br>4325211<br>4341792<br>4328326<br>4336216<br>4335430<br>3131463 |  |  |
| <a href="#">Sulfur metabolism</a>                           | 17 | 35 | 0.114348777877 | 0.618522934881 | Ma08_g28170<br>Ma03_g32130<br>Ma04_g10990<br>Ma02_g18420<br>Ma06_g26610<br>Ma09_g26210<br>Ma08_g27570<br>Ma04_g39880<br>Ma11_g24380<br>Ma01_g16340<br>Ma05_g21880<br>Ma04_g27940<br>Ma06_g19810<br>Ma11_g14450<br>Ma01_g21430<br>Ma02_g11180<br>Ma01_g07600                                                                                                                                                                                                                                                | osa:4324655<br>osa:4334101<br>osa:4343681<br>osa:4341321<br>osa:4331941<br>osa:4352839<br>osa:4334073<br>osa:4343348<br>osa:4331065<br>osa:4339248<br>osa:4335048<br>osa:4334101<br>osa:4338825<br>osa:4352839<br>osa:4326319<br>osa:4339425<br>osa:4334073                                                                                                                                                                                                                                                 | 4324655<br>4334101<br>4343681<br>4341321<br>4331941<br>4352839<br>4334073<br>4343348<br>4331065<br>4339248<br>4335048<br>4334101<br>4338825<br>4352839<br>4326319<br>4339425<br>4334073                                                                                                                                                                                 |  |  |
| <a href="#">Pentose phosphate pathway</a>                   | 21 | 48 | 0.156688558194 | 0.792845497268 | Ma07_g13520<br>Ma08_g07480<br>Ma08_g05120<br>Ma02_g13970<br>Ma11_g16750<br>Ma05_g22300<br>Ma03_g16830<br>Ma04_g03820<br>Ma10_g28640<br>Ma08_g16120<br>Ma03_g17510<br>Ma07_g11340<br>Ma08_g15070<br>Ma02_g18360<br>Ma08_g29310<br>Ma10_g24940<br>Ma04_g13550<br>Ma07_g10560<br>Ma03_g03600<br>Ma09_g14520<br>Ma03_g16840                                                                                                                                                                                    | osa:4327301<br>osa:4325027<br>osa:4342988<br>osa:4328168<br>osa:4341770<br>osa:4349897<br>osa:4340025<br>osa:4335430<br>osa:4340677<br>osa:4349897<br>osa:4339892<br>osa:4348582<br>osa:4348230<br>osa:4327301<br>osa:4329889<br>osa:4347311<br>osa:4335430<br>osa:4327301<br>osa:4328168<br>osa:4347311<br>osa:4340025                                                                                                                                                                                     | 4327301<br>4325027<br>4342988<br>4328168<br>4341770<br>4349897<br>4340025<br>4335430<br>4340677<br>4349897<br>4339892<br>4348582<br>4348230<br>4327301<br>4329889<br>4347311<br>4335430<br>4327301<br>4328168<br>4347311<br>4340025                                                                                                                                     |  |  |
| <a href="#">Nitrogen metabolism</a>                         | 13 | 27 | 0.159901612894 | 0.792845497268 | Ma02_g01040<br>Ma02_g22240<br>Ma02_g08780                                                                                                                                                                                                                                                                                                                                                                                                                                                                  | osa:4345604<br>osa:4329556<br>osa:4329556                                                                                                                                                                                                                                                                                                                                                                                                                                                                   | 4345604<br>4329556<br>4329556                                                                                                                                                                                                                                                                                                                                           |  |  |

|                                                          |    |    |                |                |                                                                                                                                                                                                                                                                                                                                                      |                                                                                                                                                                                                                                                                                                                                                       |                                                                                                                                                                                                                                                           |  |  |
|----------------------------------------------------------|----|----|----------------|----------------|------------------------------------------------------------------------------------------------------------------------------------------------------------------------------------------------------------------------------------------------------------------------------------------------------------------------------------------------------|-------------------------------------------------------------------------------------------------------------------------------------------------------------------------------------------------------------------------------------------------------------------------------------------------------------------------------------------------------|-----------------------------------------------------------------------------------------------------------------------------------------------------------------------------------------------------------------------------------------------------------|--|--|
|                                                          |    |    |                |                | Ma03_g32240<br>Ma09_g14720<br>Ma02_g12240<br>Novel00953<br>Ma03_g06990<br>Ma05_g05300<br>Ma06_g29120<br>Ma03_g21060<br>Ma00_g04030<br>Ma08_g28590                                                                                                                                                                                                    | osa:4326583<br>osa:4326014<br>osa:4330164<br>osa:4345604<br>osa:4345604<br>osa:4347305<br>osa:4326583<br>osa:4330649<br>osa:4330649<br>osa:4324398                                                                                                                                                                                                    | 4326583<br>4326014<br>4330164<br>4345604<br>4345604<br>4347305<br>4326583<br>4330649<br>4330649<br>4324398                                                                                                                                                |  |  |
| <a href="#">Glycine, serine and threonine metabolism</a> | 23 | 55 | 0.184451104833 | 0.877987259004 | Novel01203<br>Ma06_g08130<br>Ma07_g22000<br>Ma10_g18940<br>Ma09_g07020<br>Ma01_g01610<br>Novel00240<br>Ma04_g04160<br>Ma06_g21100<br>Ma11_g07780<br>Ma07_g12740<br>Ma09_g12600<br>Ma05_g21330<br>Ma02_g08140<br>Ma10_g07330<br>Ma06_g12620<br>Ma09_g15520<br>Ma10_g09700<br>Ma08_g03130<br>Ma00_g05010<br>Ma05_g01700<br>Ma10_g16940<br>Ma11_g07790  | osa:4334425<br>osa:4352058<br>osa:4345962<br>osa:4331779<br>osa:4352058<br>osa:4349114<br>osa:4337230<br>osa:4337230<br>osa:4337051<br>osa:4341713<br>osa:4349723<br>osa:4330747<br>osa:4327981<br>osa:4350964<br>osa:4341713<br>osa:4334188<br>osa:4345606<br>osa:4334425<br>osa:4333898<br>osa:4335335<br>osa:4346642<br>osa:4336153<br>osa:4337230 | 4334425<br>4352058<br>4345962<br>4331779<br>4352058<br>4349114<br>4337230<br>4337230<br>4337051<br>4341713<br>4349723<br>4330747<br>4327981<br>4350964<br>4341713<br>4334188<br>4345606<br>4334425<br>4333898<br>4335335<br>4346642<br>4336153<br>4337230 |  |  |
| <a href="#">Fructose and mannose metabolism</a>          | 22 | 53 | 0.19854317177  | 0.90871682464  | Ma08_g07480<br>Ma11_g08450<br>Ma07_g11340<br>Ma07_g10560<br>Ma02_g04620<br>Ma02_g21000<br>Ma03_g27870<br>Ma04_g26260<br>Ma05_g22300<br>Ma10_g18160<br>Ma09_g24600<br>Ma02_g18360<br>Ma03_g08830<br>Ma04_g26280<br>Ma07_g13520<br>Ma11_g16750<br>Ma10_g16460<br>Ma08_g16120<br>Ma05_g05600<br>Ma05_g31060<br>Ma04_g16060<br>Ma09_g24170               | osa:4325027<br>osa:4324962<br>osa:4348582<br>osa:4327301<br>osa:4340050<br>osa:4332373<br>osa:4347691<br>osa:4346217<br>osa:4349897<br>osa:4332014<br>osa:4347691<br>osa:4327301<br>osa:4344231<br>osa:4346217<br>osa:4327301<br>osa:4341770<br>osa:4324962<br>osa:4349897<br>osa:4340579<br>osa:4325211<br>osa:4324962<br>osa:4337437                | 4325027<br>4324962<br>4348582<br>4327301<br>4340050<br>4332373<br>4347691<br>4346217<br>4349897<br>4332014<br>4347691<br>4327301<br>4344231<br>4346217<br>4327301<br>4341770<br>4324962<br>4349897<br>4340579<br>4325211<br>4324962<br>4337437            |  |  |
| <a href="#">Propanoate metabolism</a>                    | 7  | 14 | 0.23901912012  | 0.999999998471 | Ma08_g15550<br>Ma07_g06750<br>Ma11_g21050<br>Ma04_g28920<br>Ma10_g12590<br>Ma08_g30510<br>Ma07_g06760                                                                                                                                                                                                                                                | osa:4351929<br>osa:4328012<br>osa:4330016<br>osa:4342610<br>osa:4329518<br>osa:4344267<br>osa:4328012                                                                                                                                                                                                                                                 | 4351929<br>4328012<br>4330016<br>4342610<br>4329518<br>4344267<br>4328012                                                                                                                                                                                 |  |  |
| <a href="#">Peroxisome</a>                               | 30 | 78 | 0.244710891779 | 0.999999998471 | Ma04_g10090<br>Ma06_g21190<br>Ma02_g04310<br>Ma07_g22000<br>Ma02_g24010<br>Ma07_g03790<br>Ma07_g06830<br>Ma03_g00220<br>Ma03_g14690<br>Ma09_g30420<br>Ma09_g20440<br>Ma03_g00940<br>Ma10_g14370<br>Ma11_g15660<br>Ma02_g10050<br>Ma02_g03420<br>Ma09_g30400<br>Ma10_g07820<br>Ma03_g19080<br>Novel01373<br>Ma04_g08370<br>Ma03_g01840<br>Ma03_g13720 | osa:4326266<br>osa:4337048<br>osa:4332846<br>osa:4345962<br>osa:4340986<br>osa:4332846<br>osa:4346360<br>osa:4331150<br>osa:4328073<br>osa:4346301<br>osa:4346329<br>osa:4346459<br>osa:4328861<br>osa:4348804<br>osa:4351610<br>osa:4336980<br>osa:4346301<br>osa:4346329<br>osa:4338417<br>osa:4339846<br>osa:4324427<br>osa:4343908<br>osa:4331150 | 4326266<br>4337048<br>4332846<br>4345962<br>4340986<br>4332846<br>4346360<br>4331150<br>4328073<br>4346301<br>4346329<br>4346459<br>4328861<br>4348804<br>4351610<br>4336980<br>4346301<br>4346329<br>4338417<br>4339846<br>4324427<br>4343908<br>4331150 |  |  |

|                                              |    |     |                |                |                                                                                                                                                                                                                                                                                                                                                                                                                                                                                                                                                                                                                                                                                                                |                                                                                                                                                                                                                                                                                                                                                                                                                                                                                                                                                                                                                                                                                                                |                                                                                                                                                                                                                                                                                                                                                                                                                                                                                                                        |  |  |
|----------------------------------------------|----|-----|----------------|----------------|----------------------------------------------------------------------------------------------------------------------------------------------------------------------------------------------------------------------------------------------------------------------------------------------------------------------------------------------------------------------------------------------------------------------------------------------------------------------------------------------------------------------------------------------------------------------------------------------------------------------------------------------------------------------------------------------------------------|----------------------------------------------------------------------------------------------------------------------------------------------------------------------------------------------------------------------------------------------------------------------------------------------------------------------------------------------------------------------------------------------------------------------------------------------------------------------------------------------------------------------------------------------------------------------------------------------------------------------------------------------------------------------------------------------------------------|------------------------------------------------------------------------------------------------------------------------------------------------------------------------------------------------------------------------------------------------------------------------------------------------------------------------------------------------------------------------------------------------------------------------------------------------------------------------------------------------------------------------|--|--|
|                                              |    |     |                |                | Ma11_g16120<br>Ma09_g11860<br>Ma08_g26760<br>Ma04_g14180<br>Ma06_g38960<br>Ma09_g30410<br>Ma04_g06850                                                                                                                                                                                                                                                                                                                                                                                                                                                                                                                                                                                                          | osa:4330220<br>osa:4347528<br>osa:4328779<br>osa:4352306<br>osa:4336353<br>osa:4346301<br>osa:4332082                                                                                                                                                                                                                                                                                                                                                                                                                                                                                                                                                                                                          | 4330220<br>4347528<br>4328779<br>4352306<br>4336353<br>4346301<br>4332082                                                                                                                                                                                                                                                                                                                                                                                                                                              |  |  |
| <a href="#">Cyanoamino acid metabolism</a>   | 15 | 36  | 0.251976195133 | 0.999999998471 | Ma06_g16830<br>Ma05_g23890<br>Ma11_g05360<br>Ma06_g08130<br>Ma06_g29240<br>Ma07_g22060<br>Ma08_g13290<br>Ma09_g07020<br>Ma05_g21880<br>Ma06_g29250<br>Ma03_g32060<br>Ma08_g25110<br>Ma06_g16590<br>Ma03_g00730<br>Ma09_g06900                                                                                                                                                                                                                                                                                                                                                                                                                                                                                  | osa:4324526<br>osa:4338560<br>osa:4338560<br>osa:4352058<br>osa:4332041<br>osa:4336146<br>osa:4330077<br>osa:4352058<br>osa:4335048<br>osa:4332041<br>osa:4334116<br>osa:4336146<br>osa:4324619<br>osa:9266710<br>osa:4332041                                                                                                                                                                                                                                                                                                                                                                                                                                                                                  | 4324526<br>4338560<br>4338560<br>4352058<br>4332041<br>4336146<br>4330077<br>4352058<br>4335048<br>4332041<br>4334116<br>4336146<br>4324619<br>9266710<br>4332041                                                                                                                                                                                                                                                                                                                                                      |  |  |
| <a href="#">Phenylpropanoid biosynthesis</a> | 46 | 125 | 0.257265480493 | 0.999999998471 | Ma06_g16060<br>Ma01_g21440<br>Ma06_g19750<br>Ma03_g06130<br>Ma06_g16100<br>Ma07_g22060<br>Ma01_g21520<br>Ma05_g31950<br>Ma07_g11120<br>Ma02_g07020<br>Ma03_g05380<br>Ma08_g25110<br>Ma06_g16590<br>Ma02_g04920<br>Ma09_g06900<br>Ma11_g05360<br>Ma04_g10150<br>Ma06_g29240<br>Ma10_g25840<br>Ma06_g10250<br>Ma10_g15940<br>Ma09_g13580<br>Ma01_g04420<br>Ma09_g31400<br>Ma09_g23330<br>Ma10_g27820<br>Ma03_g32060<br>Ma02_g22450<br>Ma03_g03400<br>Ma11_g19280<br>Ma04_g05290<br>Ma05_g27310<br>Ma11_g21180<br>Ma06_g10290<br>Ma09_g30120<br>Ma07_g09220<br>Ma05_g23890<br>Ma09_g25700<br>Ma05_g27130<br>Ma03_g13910<br>Ma01_g03820<br>Ma06_g29250<br>Ma08_g10630<br>Ma03_g05400<br>Ma11_g15990<br>Ma10_g23920 | osa:4341249<br>osa:4347520<br>osa:4344496<br>osa:4340240<br>osa:4341249<br>osa:4336146<br>osa:4344496<br>osa:4351300<br>osa:4332174<br>osa:4347074<br>osa:4329324<br>osa:4336146<br>osa:4324619<br>osa:4341861<br>osa:4332041<br>osa:4338560<br>osa:4345689<br>osa:4332041<br>osa:4332174<br>osa:4338409<br>osa:4324554<br>osa:4329329<br>osa:4336415<br>osa:4348690<br>osa:4328485<br>osa:4341247<br>osa:4334116<br>osa:4324557<br>osa:4341249<br>osa:4344045<br>osa:4351300<br>osa:4347520<br>osa:4336415<br>osa:4351300<br>osa:4337482<br>osa:4341249<br>osa:4338560<br>osa:4340240<br>osa:4328684<br>osa:4346726<br>osa:4343453<br>osa:4332041<br>osa:4337732<br>osa:4329329<br>osa:4349097<br>osa:4345689 | 4341249<br>4347520<br>4344496<br>4340240<br>4341249<br>4336146<br>4344496<br>4351300<br>4332174<br>4347074<br>4329324<br>4336146<br>4324619<br>4341861<br>4332041<br>4338560<br>4345689<br>4332041<br>4332174<br>4338409<br>4324554<br>4329329<br>4336415<br>4348690<br>4328485<br>4341247<br>4334116<br>4324557<br>4341249<br>4344045<br>4351300<br>4347520<br>4336415<br>4351300<br>4337482<br>4341249<br>4338560<br>4340240<br>4328684<br>4346726<br>4343453<br>4332041<br>4337732<br>4329329<br>4349097<br>4345689 |  |  |
| <a href="#">Endocytosis</a>                  | 38 | 103 | 0.277408890598 | 0.999999998471 | Ma09_g07430<br>Ma06_g13850<br>Ma05_g03640<br>Ma01_g05510<br>Ma02_g18000<br>Ma01_g08380<br>Ma05_g05940<br>Ma05_g02240<br>Ma06_g33480<br>Ma04_g02360<br>Ma07_g18790<br>Ma07_g16530<br>Ma10_g29250<br>Ma09_g28540<br>Ma04_g11640<br>Ma08_g21660<br>Ma09_g03950<br>Ma10_g26890                                                                                                                                                                                                                                                                                                                                                                                                                                     | osa:4351875<br>osa:4351875<br>osa:4348891<br>osa:4339623<br>osa:4351208<br>osa:4347745<br>osa:4344016<br>osa:4333538<br>osa:4341266<br>osa:4327591<br>osa:4347745<br>osa:4352862<br>osa:4327591<br>osa:4330565<br>osa:4331873<br>osa:4351208<br>osa:4351208<br>osa:4327647                                                                                                                                                                                                                                                                                                                                                                                                                                     | 4351875<br>4351875<br>4348891<br>4339623<br>4351208<br>4347745<br>4344016<br>4333538<br>4341266<br>4327591<br>4347745<br>4352862<br>4327591<br>4330565<br>4331873<br>4351208<br>4351208<br>4327647                                                                                                                                                                                                                                                                                                                     |  |  |

|                                                                       |     |     |                |                |                                                                                                                                                                                                                                                                                                                                                                                                                                                                                                                                                                                                     |                                                                                                                                                                                                                                                                                                                                                                                                                                                                                                                                                                                                       |                                                                                                                                                                                                                                                                                                                                                                                                                                           |  |  |
|-----------------------------------------------------------------------|-----|-----|----------------|----------------|-----------------------------------------------------------------------------------------------------------------------------------------------------------------------------------------------------------------------------------------------------------------------------------------------------------------------------------------------------------------------------------------------------------------------------------------------------------------------------------------------------------------------------------------------------------------------------------------------------|-------------------------------------------------------------------------------------------------------------------------------------------------------------------------------------------------------------------------------------------------------------------------------------------------------------------------------------------------------------------------------------------------------------------------------------------------------------------------------------------------------------------------------------------------------------------------------------------------------|-------------------------------------------------------------------------------------------------------------------------------------------------------------------------------------------------------------------------------------------------------------------------------------------------------------------------------------------------------------------------------------------------------------------------------------------|--|--|
|                                                                       |     |     |                |                | Ma08_g34730<br>Ma05_g08750<br>Ma01_g04080<br>Ma03_g19140<br>Ma03_g12870<br>Ma06_g30090<br>Ma09_g23230<br>Ma02_g11360<br>Ma06_g17930<br>Ma07_g15130<br>Ma06_g37750<br>Ma01_g08090<br>Ma04_g02580<br>Ma05_g25590<br>Ma06_g06700<br>Ma04_g06320<br>Ma08_g21650<br>Ma09_g05400<br>Ma09_g18500<br>Ma10_g06890                                                                                                                                                                                                                                                                                            | osa:4339012<br>osa:4327852<br>osa:4343612<br>osa:4327591<br>osa:4341638<br>osa:4351875<br>osa:4341494<br>osa:4341266<br>osa:4337536<br>osa:4332427<br>osa:4327647<br>osa:4327647<br>osa:4341266<br>osa:4341894<br>osa:4342791<br>osa:4341494<br>osa:4351208<br>osa:4327180<br>osa:4340850<br>osa:4327180                                                                                                                                                                                                                                                                                              | 4339012<br>4327852<br>4343612<br>4327591<br>4341638<br>4351875<br>4341494<br>4341266<br>4337536<br>4332427<br>4327647<br>4327647<br>4341266<br>4341894<br>4342791<br>4341494<br>4351208<br>4327180<br>4340850<br>4327180                                                                                                                                                                                                                  |  |  |
| <a href="#">Linoleic acid metabolism</a>                              | 7   | 15  | 0.281521390223 | 0.999999998471 | Ma08_g23400<br>Ma03_g07770<br>Ma03_g11520<br>Ma06_g26870<br>Ma09_g15420<br>Ma07_g11670<br>Ma09_g12090                                                                                                                                                                                                                                                                                                                                                                                                                                                                                               | osa:4331824<br>osa:4331824<br>osa:4328603<br>osa:4333821<br>osa:4331824<br>osa:4333862<br>osa:4345994                                                                                                                                                                                                                                                                                                                                                                                                                                                                                                 | 4331824<br>4331824<br>4328603<br>4333821<br>4331824<br>4333862<br>4345994                                                                                                                                                                                                                                                                                                                                                                 |  |  |
| <a href="#">Steroid biosynthesis</a>                                  | 11  | 26  | 0.284251847108 | 0.999999998471 | Ma07_g28990<br>Ma09_g03480<br>Ma10_g12270<br>Ma08_g04900<br>Ma04_g32060<br>Ma10_g26480<br>Ma08_g04920<br>Ma06_g11320<br>Ma11_g20450<br>Ma03_g01370<br>Ma10_g14440                                                                                                                                                                                                                                                                                                                                                                                                                                   | osa:4342690<br>osa:4342171<br>osa:4350614<br>osa:4332153<br>osa:4331540<br>osa:4351226<br>osa:4332153<br>osa:4325687<br>osa:4349278<br>osa:4325687<br>osa:4325563                                                                                                                                                                                                                                                                                                                                                                                                                                     | 4342690<br>4342171<br>4350614<br>4332153<br>4331540<br>4351226<br>4332153<br>4325687<br>4349278<br>4325687<br>4325563                                                                                                                                                                                                                                                                                                                     |  |  |
| <a href="#">Stilbenoid, diarylheptanoid and gingerol biosynthesis</a> | 8   | 18  | 0.2937445041   | 0.999999998471 | Ma03_g05400<br>Ma09_g25700<br>Ma07_g09040<br>Ma07_g06700<br>Ma03_g06130<br>Ma06_g10250<br>Ma03_g05380<br>Ma09_g13580                                                                                                                                                                                                                                                                                                                                                                                                                                                                                | osa:4329329<br>osa:4340240<br>osa:4341325<br>osa:4349111<br>osa:4340240<br>osa:4338409<br>osa:4329324<br>osa:4329329                                                                                                                                                                                                                                                                                                                                                                                                                                                                                  | 4329329<br>4340240<br>4341325<br>4349111<br>4340240<br>4338409<br>4329324<br>4329329                                                                                                                                                                                                                                                                                                                                                      |  |  |
| <a href="#">Ribosome</a>                                              | 114 | 330 | 0.296883553899 | 0.999999998471 | Ma11_g15870<br>Ma05_g14780<br>Ma05_g19200<br>Ma10_g13230<br>Ma09_g07060<br>Ma04_g29740<br>Ma04_g28630<br>Ma11_g20970<br>Novel00326<br>Ma01_g21100<br>Ma07_g21220<br>Ma04_g11020<br>Ma05_g16500<br>Ma08_g29860<br>Ma02_g21120<br>Ma02_g08870<br>Ma06_g17050<br>Ma11_g23780<br>Ma06_g17110<br>Ma11_g13860<br>Ma09_g00010<br>Ma09_g25400<br>Ma04_g17690<br>Ma05_g24650<br>Ma01_g10140<br>Ma03_g28710<br>Ma01_g15830<br>Ma04_g29360<br>Ma03_g22300<br>Ma10_g06200<br>Ma08_g17750<br>Ma10_g07390<br>Novel01247<br>Ma08_g33500<br>Ma10_g18960<br>Ma11_g24100<br>Ma04_g06070<br>Ma04_g24620<br>Ma00_g02380 | osa:4331459<br>osa:4348607<br>osa:4334131<br>osa:4332545<br>osa:4335547<br>osa:9272292<br>osa:4326469<br>osa:4352560<br>osa:4351513<br>osa:4327257<br>osa:4346086<br>osa:4331942<br>osa:4343909<br>osa:4348846<br>osa:4344590<br>osa:4350869<br>osa:4332466<br>osa:4332802<br>osa:4339104<br>osa:4350516<br>osa:4325555<br>osa:9266960<br>osa:4334580<br>osa:4334438<br>osa:4327004<br>osa:4339923<br>osa:4332089<br>osa:9266562<br>osa:4351374<br>osa:4335607<br>osa:4351513<br>osa:4336914<br>osa:4348843<br>osa:4341869<br>osa:4328635<br>osa:4342408<br>osa:4348846<br>osa:4325273<br>osa:4327483 | 4331459<br>4348607<br>4334131<br>4332545<br>4335547<br>9272292<br>4326469<br>4352560<br>4351513<br>4327257<br>4346086<br>4331942<br>4343909<br>4348846<br>4344590<br>4350869<br>4332466<br>4332802<br>4339104<br>4350516<br>4325555<br>9266960<br>4334580<br>4334438<br>4327004<br>4339923<br>4332089<br>9266562<br>4351374<br>4335607<br>4351513<br>4336914<br>4348843<br>4341869<br>4328635<br>4342408<br>4348846<br>4325273<br>4327483 |  |  |

|                                        |    |    |                |                |             |             |         |  |  |
|----------------------------------------|----|----|----------------|----------------|-------------|-------------|---------|--|--|
|                                        |    |    |                |                | Ma05_g02510 | osa:9266562 | 9266562 |  |  |
|                                        |    |    |                |                | Ma03_g01330 | osa:4351513 | 4351513 |  |  |
|                                        |    |    |                |                | Ma03_g03800 | osa:4337653 | 4337653 |  |  |
|                                        |    |    |                |                | Ma09_g22950 | osa:4348846 | 4348846 |  |  |
|                                        |    |    |                |                | Ma10_g00610 | osa:4328797 | 4328797 |  |  |
|                                        |    |    |                |                | Ma06_g24940 | osa:4330946 | 4330946 |  |  |
|                                        |    |    |                |                | Ma00_g03400 | osa:4351604 | 4351604 |  |  |
|                                        |    |    |                |                | Ma02_g23940 | osa:4351374 | 4351374 |  |  |
|                                        |    |    |                |                | Ma10_g26340 | osa:9267955 | 9267955 |  |  |
|                                        |    |    |                |                | Ma02_g03590 | osa:4338571 | 4338571 |  |  |
|                                        |    |    |                |                | Ma06_g26930 | osa:4349726 | 4349726 |  |  |
|                                        |    |    |                |                | Ma01_g00800 | osa:4341664 | 4341664 |  |  |
|                                        |    |    |                |                | Ma05_g21010 | osa:4346540 | 4346540 |  |  |
|                                        |    |    |                |                | Ma02_g17430 | osa:4328797 | 4328797 |  |  |
|                                        |    |    |                |                | Ma04_g10730 | osa:4329171 | 4329171 |  |  |
|                                        |    |    |                |                | Ma11_g23830 | osa:4328016 | 4328016 |  |  |
|                                        |    |    |                |                | Ma11_g16510 | osa:4334651 | 4334651 |  |  |
|                                        |    |    |                |                | Ma05_g28030 | osa:4350406 | 4350406 |  |  |
|                                        |    |    |                |                | Novel00874  | osa:4352797 | 4352797 |  |  |
|                                        |    |    |                |                | Ma01_g20160 | osa:4343869 | 4343869 |  |  |
|                                        |    |    |                |                | Ma11_g14090 | osa:4329362 | 4329362 |  |  |
|                                        |    |    |                |                | Ma08_g02490 | osa:4335607 | 4335607 |  |  |
|                                        |    |    |                |                | Ma07_g12470 | osa:4330763 | 4330763 |  |  |
|                                        |    |    |                |                | Ma10_g29570 | osa:4343869 | 4343869 |  |  |
|                                        |    |    |                |                | Ma02_g10840 | osa:4339648 | 4339648 |  |  |
|                                        |    |    |                |                | Ma08_g31060 | osa:4328472 | 4328472 |  |  |
|                                        |    |    |                |                | Ma06_g32850 | osa:9266562 | 9266562 |  |  |
|                                        |    |    |                |                | Ma11_g18070 | osa:4329362 | 4329362 |  |  |
|                                        |    |    |                |                | Ma02_g03280 | osa:4342408 | 4342408 |  |  |
|                                        |    |    |                |                | Ma09_g25820 | osa:4348607 | 4348607 |  |  |
|                                        |    |    |                |                | Ma04_g08190 | osa:4349409 | 4349409 |  |  |
|                                        |    |    |                |                | Ma06_g05060 | osa:4340887 | 4340887 |  |  |
|                                        |    |    |                |                | Ma10_g00920 | osa:4343869 | 4343869 |  |  |
|                                        |    |    |                |                | Ma08_g34120 | osa:4332802 | 4332802 |  |  |
|                                        |    |    |                |                | Ma09_g23430 | osa:4336914 | 4336914 |  |  |
|                                        |    |    |                |                | Ma05_g08080 | osa:4329361 | 4329361 |  |  |
|                                        |    |    |                |                | Ma01_g15300 | osa:4333083 | 4333083 |  |  |
|                                        |    |    |                |                | Ma03_g01510 | osa:4351374 | 4351374 |  |  |
|                                        |    |    |                |                | Ma06_g24450 | osa:4334154 | 4334154 |  |  |
|                                        |    |    |                |                | Ma10_g11380 | osa:4338938 | 4338938 |  |  |
|                                        |    |    |                |                | Ma09_g21730 | osa:4336914 | 4336914 |  |  |
|                                        |    |    |                |                | Ma04_g27000 | osa:4336317 | 4336317 |  |  |
|                                        |    |    |                |                | Ma01_g13930 | osa:4341262 | 4341262 |  |  |
|                                        |    |    |                |                | Ma03_g01060 | osa:4334580 | 4334580 |  |  |
|                                        |    |    |                |                | Ma06_g07140 | osa:4328797 | 4328797 |  |  |
|                                        |    |    |                |                | Ma02_g16430 | osa:6450193 | 6450193 |  |  |
|                                        |    |    |                |                | Ma06_g10220 | osa:4337928 | 4337928 |  |  |
|                                        |    |    |                |                | Ma06_g35440 | osa:4327674 | 4327674 |  |  |
|                                        |    |    |                |                | Ma04_g15270 | osa:4349409 | 4349409 |  |  |
|                                        |    |    |                |                | Ma04_g10490 | osa:4349409 | 4349409 |  |  |
|                                        |    |    |                |                | Ma10_g17150 | osa:4346086 | 4346086 |  |  |
|                                        |    |    |                |                | Ma04_g12660 | osa:4336914 | 4336914 |  |  |
|                                        |    |    |                |                | Ma03_g19680 | osa:4352308 | 4352308 |  |  |
|                                        |    |    |                |                | Ma00_g02740 | osa:4332773 | 4332773 |  |  |
|                                        |    |    |                |                | Ma05_g06910 | osa:4327391 | 4327391 |  |  |
|                                        |    |    |                |                | Ma03_g13020 | osa:4331014 | 4331014 |  |  |
|                                        |    |    |                |                | Ma09_g20220 | osa:4339552 | 4339552 |  |  |
|                                        |    |    |                |                | Ma08_g24590 | osa:4330425 | 4330425 |  |  |
|                                        |    |    |                |                | Ma03_g21390 | osa:4324446 | 4324446 |  |  |
|                                        |    |    |                |                | Ma06_g11370 | osa:4351513 | 4351513 |  |  |
|                                        |    |    |                |                | Ma05_g22670 | osa:4331459 | 4331459 |  |  |
|                                        |    |    |                |                | Ma01_g17660 | osa:4332773 | 4332773 |  |  |
|                                        |    |    |                |                | Ma10_g29730 | osa:4345669 | 4345669 |  |  |
|                                        |    |    |                |                | Ma08_g21210 | osa:4328932 | 4328932 |  |  |
|                                        |    |    |                |                | Ma06_g28790 | osa:4326865 | 4326865 |  |  |
|                                        |    |    |                |                | Ma05_g18200 | osa:4333233 | 4333233 |  |  |
|                                        |    |    |                |                | Ma03_g00680 | osa:4328016 | 4328016 |  |  |
|                                        |    |    |                |                | Novel00357  | osa:4330946 | 4330946 |  |  |
|                                        |    |    |                |                | Ma04_g36730 | osa:4348839 | 4348839 |  |  |
|                                        |    |    |                |                | Ma06_g24090 | osa:4328826 | 4328826 |  |  |
|                                        |    |    |                |                | Ma04_g24910 | osa:4327674 | 4327674 |  |  |
|                                        |    |    |                |                | Ma07_g26990 | osa:4338938 | 4338938 |  |  |
|                                        |    |    |                |                | Ma10_g22710 | osa:4327391 | 4327391 |  |  |
|                                        |    |    |                |                | Ma11_g02570 | osa:4331346 | 4331346 |  |  |
|                                        |    |    |                |                | Ma01_g08150 | osa:4342771 | 4342771 |  |  |
|                                        |    |    |                |                | Ma04_g25530 | osa:4331130 | 4331130 |  |  |
|                                        |    |    |                |                | Ma08_g29910 | osa:4350053 | 4350053 |  |  |
|                                        |    |    |                |                | Ma07_g11500 | osa:4331893 | 4331893 |  |  |
|                                        |    |    |                |                | Ma03_g00220 | osa:4331150 | 4331150 |  |  |
|                                        |    |    |                |                | Ma02_g24010 | osa:4340986 | 4340986 |  |  |
|                                        |    |    |                |                | Ma08_g30510 | osa:4344267 | 4344267 |  |  |
|                                        |    |    |                |                | Ma09_g08110 | osa:4350053 | 4350053 |  |  |
|                                        |    |    |                |                | Ma03_g06120 | osa:4340725 | 4340725 |  |  |
|                                        |    |    |                |                | Ma05_g05010 | osa:4340725 | 4340725 |  |  |
|                                        |    |    |                |                | Novel01373  | osa:4339846 | 4339846 |  |  |
|                                        |    |    |                |                | Ma11_g15660 | osa:4348804 | 4348804 |  |  |
| <a href="#">Fatty acid degradation</a> | 16 | 41 | 0.311289265065 | 0.999999998471 |             |             |         |  |  |



|                                                                     |    |    |                |               |                                                                                                                                                                                                                                                                                                                                                       |                                                                                                                                                                                                                                                                                                                                                       |                                                                                                                                                                                                                                                           |  |  |
|---------------------------------------------------------------------|----|----|----------------|---------------|-------------------------------------------------------------------------------------------------------------------------------------------------------------------------------------------------------------------------------------------------------------------------------------------------------------------------------------------------------|-------------------------------------------------------------------------------------------------------------------------------------------------------------------------------------------------------------------------------------------------------------------------------------------------------------------------------------------------------|-----------------------------------------------------------------------------------------------------------------------------------------------------------------------------------------------------------------------------------------------------------|--|--|
|                                                                     |    |    |                |               | Ma02_g09950<br>Ma04_g31940<br>Ma02_g10050<br>Ma07_g11510<br>Ma03_g13720                                                                                                                                                                                                                                                                               | osa:4350053<br>osa:4330090<br>osa:4351610<br>osa:4331893<br>osa:4331150                                                                                                                                                                                                                                                                               | 4350053<br>4330090<br>4351610<br>4331893<br>4331150                                                                                                                                                                                                       |  |  |
| <a href="#">Ascorbate and aldarate metabolism</a>                   | 14 | 36 | 0.332436313342 | 0.99999998471 | Ma06_g14310<br>Ma07_g28480<br>Ma05_g24340<br>Ma07_g28490<br>Ma04_g08270<br>Ma03_g31530<br>Ma03_g06120<br>Ma07_g28080<br>Ma07_g28090<br>Ma05_g05010<br>Ma06_g08980<br>Ma07_g07290<br>Ma10_g18290<br>Ma06_g15020                                                                                                                                        | osa:4351698<br>osa:4352223<br>osa:4341967<br>osa:4352223<br>osa:4341305<br>osa:4352146<br>osa:4340725<br>osa:4333156<br>osa:4333156<br>osa:4340725<br>osa:4351698<br>osa:4336886<br>osa:4352146<br>osa:4351698                                                                                                                                        | 4351698<br>4352223<br>4341967<br>4352223<br>4341305<br>4352146<br>4340725<br>4333156<br>4333156<br>4340725<br>4351698<br>4336886<br>4352146<br>4351698                                                                                                    |  |  |
| <a href="#">Phenylalanine, tyrosine and tryptophan biosynthesis</a> | 16 | 42 | 0.339162436572 | 0.99999998471 | Ma08_g19500<br>Ma09_g07380<br>Ma03_g20800<br>Ma01_g14880<br>Ma06_g07590<br>Ma05_g20810<br>Ma10_g09700<br>Ma10_g08510<br>Ma02_g05120<br>Ma10_g11420<br>Novel01203<br>Ma03_g11800<br>Ma09_g29570<br>Ma06_g21530<br>Ma08_g33410<br>Ma08_g14830                                                                                                           | osa:4335756<br>osa:4332341<br>osa:4340547<br>osa:4343946<br>osa:4333918<br>osa:4332477<br>osa:4334425<br>osa:4347717<br>osa:4340026<br>osa:4335756<br>osa:4334425<br>osa:4346529<br>osa:4329101<br>osa:4325444<br>osa:4335756<br>osa:4332286                                                                                                          | 4335756<br>4332341<br>4340547<br>4343946<br>4333918<br>4332477<br>4334425<br>4347717<br>4340026<br>4335756<br>4334425<br>4346529<br>4329101<br>4325444<br>4335756<br>4332286                                                                              |  |  |
| <a href="#">Arginine and proline metabolism</a>                     | 23 | 63 | 0.353380096863 | 0.99999998471 | Ma06_g26480<br>Ma08_g02290<br>Ma05_g23060<br>Ma07_g20920<br>Ma02_g12240<br>Ma11_g23060<br>Ma06_g05530<br>Ma05_g11820<br>Ma01_g03420<br>Ma05_g15910<br>Ma03_g06120<br>Ma00_g04600<br>Ma03_g04640<br>Ma00_g04030<br>Ma05_g26570<br>Ma09_g13000<br>Ma02_g05150<br>Ma05_g00590<br>Ma05_g05010<br>Ma09_g24200<br>Ma04_g06200<br>Ma04_g18620<br>Ma03_g21060 | osa:4334196<br>osa:4338979<br>osa:4349318<br>osa:4329955<br>osa:4330164<br>osa:4343164<br>osa:4329955<br>osa:4349012<br>osa:4340008<br>osa:4333177<br>osa:4340725<br>osa:4337360<br>osa:4329955<br>osa:4330649<br>osa:4329955<br>osa:4347103<br>osa:4340008<br>osa:4337046<br>osa:4340725<br>osa:4349012<br>osa:4342996<br>osa:4334912<br>osa:4330649 | 4334196<br>4338979<br>4349318<br>4329955<br>4330164<br>4343164<br>4329955<br>4349012<br>4340008<br>4333177<br>4340725<br>4337360<br>4329955<br>4330649<br>4329955<br>4347103<br>4340008<br>4337046<br>4340725<br>4349012<br>4342996<br>4334912<br>4330649 |  |  |
| <a href="#">Other glycan degradation</a>                            | 6  | 14 | 0.362929600983 | 0.99999998471 | Ma06_g19820<br>Ma04_g36700<br>Ma05_g17580<br>Ma06_g01700<br>Ma05_g09350<br>Ma06_g01670                                                                                                                                                                                                                                                                | osa:4350171<br>osa:4348876<br>osa:4348080<br>osa:4324914<br>osa:4339457<br>osa:4338802                                                                                                                                                                                                                                                                | 4350171<br>4348876<br>4348080<br>4324914<br>4339457<br>4338802                                                                                                                                                                                            |  |  |
| <a href="#">Glycerolipid metabolism</a>                             | 16 | 43 | 0.36755053441  | 0.99999998471 | Ma05_g05010<br>Ma09_g27580<br>Ma03_g02590<br>Ma08_g02250<br>Ma05_g29560<br>Ma08_g02270<br>Ma07_g10180<br>Ma03_g25580<br>Ma03_g06120<br>Ma10_g10450<br>Ma05_g12640<br>Ma09_g28900<br>Ma10_g21240<br>Ma04_g26360<br>Ma09_g08810<br>Ma09_g03520                                                                                                          | osa:4340725<br>osa:4345212<br>osa:4352615<br>osa:4332372<br>osa:4351119<br>osa:4332054<br>osa:4350917<br>osa:4351119<br>osa:4340725<br>osa:4349835<br>osa:4349006<br>osa:4338045<br>osa:4338045<br>osa:4330302<br>osa:4345212<br>osa:4332372                                                                                                          | 4340725<br>4345212<br>4352615<br>4332372<br>4351119<br>4332054<br>4350917<br>4351119<br>4340725<br>4349835<br>4349006<br>4338045<br>4338045<br>4330302<br>4345212<br>4332372                                                                              |  |  |
| <a href="#">Cutin, suberine and wax biosynthesis</a>                | 7  | 17 | 0.37072341628  | 0.99999998471 | Ma11_g15810<br>Ma09_g12850<br>Ma02_g13310<br>Ma11_g19740<br>Ma09_g30420                                                                                                                                                                                                                                                                               | osa:4330012<br>osa:4350569<br>osa:4348947<br>osa:4330012<br>osa:4346301                                                                                                                                                                                                                                                                               | 4330012<br>4350569<br>4348947<br>4330012<br>4346301                                                                                                                                                                                                       |  |  |

|                                                                     |    |    |                |                |                                                                                                                                                                                                                                                                                                                                                                                                                                                                                                                            |                                                                                                                                                                                                                                                                                                                                                                                                                                                                                                                            |                                                                                                                                                                                                                                                                                                                                                                                    |  |  |
|---------------------------------------------------------------------|----|----|----------------|----------------|----------------------------------------------------------------------------------------------------------------------------------------------------------------------------------------------------------------------------------------------------------------------------------------------------------------------------------------------------------------------------------------------------------------------------------------------------------------------------------------------------------------------------|----------------------------------------------------------------------------------------------------------------------------------------------------------------------------------------------------------------------------------------------------------------------------------------------------------------------------------------------------------------------------------------------------------------------------------------------------------------------------------------------------------------------------|------------------------------------------------------------------------------------------------------------------------------------------------------------------------------------------------------------------------------------------------------------------------------------------------------------------------------------------------------------------------------------|--|--|
|                                                                     |    |    |                |                | Ma09_g30410<br>Ma09_g30400                                                                                                                                                                                                                                                                                                                                                                                                                                                                                                 | osa:4346301<br>osa:4346301                                                                                                                                                                                                                                                                                                                                                                                                                                                                                                 | 4346301<br>4346301                                                                                                                                                                                                                                                                                                                                                                 |  |  |
| <a href="#">Glycosphingolipid biosynthesis - ganglio series</a>     | 3  | 6  | 0.385526948481 | 0.999999998471 | Ma05_g09350<br>Ma06_g01700<br>Ma06_g01670                                                                                                                                                                                                                                                                                                                                                                                                                                                                                  | osa:4339457<br>osa:4324914<br>osa:4338802                                                                                                                                                                                                                                                                                                                                                                                                                                                                                  | 4339457<br>4324914<br>4338802                                                                                                                                                                                                                                                                                                                                                      |  |  |
| <a href="#">Ubiquinone and other terpenoid-quinone biosynthesis</a> | 12 | 32 | 0.390088561412 | 0.999999998471 | Ma02_g14500<br>Ma04_g07830<br>Ma09_g23330<br>Ma03_g05400<br>Ma04_g12630<br>Ma03_g29220<br>Ma08_g21280<br>Ma06_g10250<br>Ma03_g05380<br>Ma09_g29570<br>Ma09_g13580<br>Ma04_g07860                                                                                                                                                                                                                                                                                                                                           | osa:4352791<br>osa:4327859<br>osa:4328485<br>osa:4329329<br>osa:4341663<br>osa:4341663<br>osa:4329007<br>osa:4338409<br>osa:4329324<br>osa:4329101<br>osa:4329329<br>osa:4327859                                                                                                                                                                                                                                                                                                                                           | 4352791<br>4327859<br>4328485<br>4329329<br>4341663<br>4341663<br>4329007<br>4338409<br>4329324<br>4329101<br>4329329<br>4327859                                                                                                                                                                                                                                                   |  |  |
| <a href="#">ABC transporters</a>                                    | 4  | 9  | 0.399232758074 | 0.999999998471 | Ma01_g17310<br>Ma04_g04450<br>Ma04_g26720<br>Ma08_g30300                                                                                                                                                                                                                                                                                                                                                                                                                                                                   | osa:9268765<br>osa:4346344<br>osa:4328568<br>osa:9268765                                                                                                                                                                                                                                                                                                                                                                                                                                                                   | 9268765<br>4346344<br>4328568<br>9268765                                                                                                                                                                                                                                                                                                                                           |  |  |
| <a href="#">Brassinosteroid biosynthesis</a>                        | 4  | 9  | 0.399232758074 | 0.999999998471 | Ma04_g11650<br>Ma08_g27070<br>Ma05_g04020<br>Ma10_g27460                                                                                                                                                                                                                                                                                                                                                                                                                                                                   | osa:4324809<br>osa:4332134<br>osa:4336116<br>osa:4327329                                                                                                                                                                                                                                                                                                                                                                                                                                                                   | 4324809<br>4332134<br>4336116<br>4327329                                                                                                                                                                                                                                                                                                                                           |  |  |
| <a href="#">Phenylalanine metabolism</a>                            | 34 | 99 | 0.42090950187  | 0.999999998471 | Ma06_g16060<br>Ma01_g21440<br>Ma06_g19750<br>Ma03_g13910<br>Ma06_g16100<br>Ma01_g21520<br>Ma05_g31950<br>Ma07_g11120<br>Ma03_g05380<br>Ma09_g29570<br>Ma02_g04920<br>Ma11_g19280<br>Ma10_g25840<br>Ma06_g10250<br>Ma10_g15940<br>Ma09_g13580<br>Ma01_g04420<br>Ma09_g23330<br>Ma10_g27820<br>Ma02_g22450<br>Ma03_g03400<br>Ma04_g05290<br>Ma05_g27310<br>Ma11_g21180<br>Ma06_g10290<br>Ma09_g30120<br>Ma07_g09220<br>Ma09_g25700<br>Ma03_g06130<br>Ma00_g05010<br>Ma01_g03820<br>Ma10_g16940<br>Ma08_g10630<br>Ma03_g05400 | osa:4341249<br>osa:4347520<br>osa:4344496<br>osa:4346726<br>osa:4341249<br>osa:4344496<br>osa:4351300<br>osa:4332174<br>osa:4329324<br>osa:4329101<br>osa:4341861<br>osa:4344045<br>osa:4332174<br>osa:4338409<br>osa:4324554<br>osa:4329329<br>osa:4336415<br>osa:4328485<br>osa:4341247<br>osa:4324557<br>osa:4341249<br>osa:4351300<br>osa:4347520<br>osa:4336415<br>osa:4351300<br>osa:4337482<br>osa:4341249<br>osa:4340240<br>osa:4340240<br>osa:4335335<br>osa:4343453<br>osa:4336153<br>osa:4337732<br>osa:4329329 | 4341249<br>4347520<br>4344496<br>4346726<br>4341249<br>4344496<br>4351300<br>4332174<br>4329324<br>4329101<br>4341861<br>4344045<br>4332174<br>4338409<br>4324554<br>4329329<br>4336415<br>4328485<br>4341247<br>4324557<br>4341249<br>4351300<br>4347520<br>4336415<br>4351300<br>4337482<br>4341249<br>4340240<br>4340240<br>4335335<br>4343453<br>4336153<br>4337732<br>4329329 |  |  |
| <a href="#">beta-Alanine metabolism</a>                             | 12 | 33 | 0.42381584305  | 0.999999998471 | Ma05_g22240<br>Ma08_g15550<br>Ma05_g00590<br>Ma04_g28920<br>Ma00_g05010<br>Ma05_g05010<br>Ma00_g04600<br>Ma08_g30510<br>Ma10_g16940<br>Ma04_g06200<br>Ma04_g37810<br>Ma03_g06120                                                                                                                                                                                                                                                                                                                                           | osa:4343249<br>osa:4351929<br>osa:4337046<br>osa:4342610<br>osa:4335335<br>osa:4340725<br>osa:4337360<br>osa:4344267<br>osa:4336153<br>osa:4342996<br>osa:4333932<br>osa:4340725                                                                                                                                                                                                                                                                                                                                           | 4343249<br>4351929<br>4337046<br>4342610<br>4335335<br>4340725<br>4337360<br>4344267<br>4336153<br>4342996<br>4333932<br>4340725                                                                                                                                                                                                                                                   |  |  |
| <a href="#">Biosynthesis of unsaturated fatty acids</a>             | 14 | 40 | 0.455859534555 | 0.999999998471 | Ma08_g20550<br>Ma03_g03560<br>Novel01373<br>Ma03_g00220<br>Ma08_g32940<br>Ma08_g04460<br>Ma10_g03470<br>Ma02_g24010<br>Ma06_g02940<br>Ma11_g15660<br>Ma06_g25950<br>Ma03_g13720<br>Ma11_g23050<br>Ma08_g21900                                                                                                                                                                                                                                                                                                              | osa:4343598<br>osa:4330523<br>osa:4339846<br>osa:4331150<br>osa:4324844<br>osa:4340334<br>osa:4330523<br>osa:4340986<br>osa:4327738<br>osa:4348804<br>osa:4334104<br>osa:4331150<br>osa:4344389<br>osa:4344389                                                                                                                                                                                                                                                                                                             | 4343598<br>4330523<br>4339846<br>4331150<br>4324844<br>4340334<br>4330523<br>4340986<br>4327738<br>4348804<br>4334104<br>4331150<br>4344389<br>4344389                                                                                                                                                                                                                             |  |  |

|                                                                        |    |    |                |               |                                                                                                                                                                                                                                                                                                                                                                                                    |                                                                                                                                                                                                                                                                                                                                                                                                    |                                                                                                                                                                                                                                                                                            |  |  |
|------------------------------------------------------------------------|----|----|----------------|---------------|----------------------------------------------------------------------------------------------------------------------------------------------------------------------------------------------------------------------------------------------------------------------------------------------------------------------------------------------------------------------------------------------------|----------------------------------------------------------------------------------------------------------------------------------------------------------------------------------------------------------------------------------------------------------------------------------------------------------------------------------------------------------------------------------------------------|--------------------------------------------------------------------------------------------------------------------------------------------------------------------------------------------------------------------------------------------------------------------------------------------|--|--|
| <a href="#">Circadian rhythm - plant</a>                               | 9  | 25 | 0.45988514401  | 0.99999998471 | Ma11_g24610<br>Ma02_g24860<br>Ma10_g20600<br>Ma06_g09780<br>Ma02_g08710<br>Ma01_g01670<br>Ma04_g16680<br>Ma10_g20580<br>Ma10_g20560                                                                                                                                                                                                                                                                | osa:4350636<br>osa:4350636<br>osa:4350636<br>osa:4350636<br>osa:4349831<br>osa:4344703<br>osa:4344703<br>osa:4350636<br>osa:4350636                                                                                                                                                                                                                                                                | 4350636<br>4350636<br>4350636<br>4350636<br>4349831<br>4344703<br>4344703<br>4350636<br>4350636                                                                                                                                                                                            |  |  |
| <a href="#">Ether lipid metabolism</a>                                 | 8  | 22 | 0.46058215883  | 0.99999998471 | Ma01_g08090<br>Ma01_g08380<br>Ma10_g26890<br>Ma04_g26360<br>Ma07_g11670<br>Ma10_g11950<br>Ma06_g37750<br>Ma07_g18790                                                                                                                                                                                                                                                                               | osa:4327647<br>osa:4347745<br>osa:4327647<br>osa:4330302<br>osa:4333862<br>osa:4326465<br>osa:4327647<br>osa:4347745                                                                                                                                                                                                                                                                               | 4327647<br>4347745<br>4327647<br>4330302<br>4333862<br>4326465<br>4327647<br>4347745                                                                                                                                                                                                       |  |  |
| <a href="#">Tropane, piperidine and pyridine alkaloid biosynthesis</a> | 6  | 16 | 0.461608444493 | 0.99999998471 | Ma09_g03470<br>Ma06_g35980<br>Ma00_g05010<br>Ma10_g16940<br>Ma09_g29570<br>Ma09_g03450                                                                                                                                                                                                                                                                                                             | osa:4332375<br>osa:4332375<br>osa:4335335<br>osa:4336153<br>osa:4329101<br>osa:4332375                                                                                                                                                                                                                                                                                                             | 4332375<br>4332375<br>4335335<br>4336153<br>4329101<br>4332375                                                                                                                                                                                                                             |  |  |
| <a href="#">SNARE interactions in vesicular transport</a>              | 13 | 38 | 0.488784767123 | 0.99999998471 | Ma04_g05470<br>Ma10_g29500<br>Ma05_g03860<br>Ma11_g17320<br>Ma01_g05280<br>Ma05_g21960<br>Ma09_g26290<br>Ma09_g00140<br>Ma08_g02910<br>Ma06_g32840<br>Ma07_g16800<br>Ma11_g15620<br>Ma09_g19180                                                                                                                                                                                                    | osa:9271327<br>osa:4341413<br>osa:4327713<br>osa:4325070<br>osa:4327678<br>osa:4331172<br>osa:4334384<br>osa:4339549<br>osa:4334356<br>osa:4334356<br>osa:4331172<br>osa:4331172<br>osa:4328159                                                                                                                                                                                                    | 9271327<br>4341413<br>4327713<br>4325070<br>4327678<br>4331172<br>4334384<br>4339549<br>4334356<br>4334356<br>4331172<br>4331172<br>4328159                                                                                                                                                |  |  |
| <a href="#">Valine, leucine and isoleucine biosynthesis</a>            | 5  | 14 | 0.514612819123 | 0.99999998471 | Ma06_g24910<br>Ma08_g03130<br>Ma03_g16070<br>Ma06_g30380<br>Ma03_g16060                                                                                                                                                                                                                                                                                                                            | osa:4339677<br>osa:4333898<br>osa:4339583<br>osa:4329938<br>osa:4332151                                                                                                                                                                                                                                                                                                                            | 4339677<br>4333898<br>4339583<br>4329938<br>4332151                                                                                                                                                                                                                                        |  |  |
| <a href="#">Glycosaminoglycan degradation</a>                          | 3  | 8  | 0.529522374345 | 0.99999998471 | Ma05_g09350<br>Ma06_g01700<br>Ma06_g01670                                                                                                                                                                                                                                                                                                                                                          | osa:4339457<br>osa:4324914<br>osa:4338802                                                                                                                                                                                                                                                                                                                                                          | 4339457<br>4324914<br>4338802                                                                                                                                                                                                                                                              |  |  |
| <a href="#">Riboflavin metabolism</a>                                  | 3  | 8  | 0.529522374345 | 0.99999998471 | Ma10_g24730<br>Ma04_g23230<br>Ma06_g32150                                                                                                                                                                                                                                                                                                                                                          | osa:4329733<br>osa:4348834<br>osa:4329733                                                                                                                                                                                                                                                                                                                                                          | 4329733<br>4348834<br>4329733                                                                                                                                                                                                                                                              |  |  |
| <a href="#">Glutathione metabolism</a>                                 | 26 | 80 | 0.535694730501 | 0.99999998471 | Ma08_g05120<br>Ma11_g12290<br>Ma04_g04960<br>Ma02_g04250<br>Ma06_g34840<br>Ma02_g05000<br>Ma09_g26530<br>Ma01_g16820<br>Ma09_g26570<br>Ma11_g18850<br>Ma05_g07440<br>Ma08_g21800<br>Ma10_g09500<br>Ma07_g07290<br>Ma05_g26600<br>Ma08_g29310<br>Ma09_g26490<br>Ma10_g23010<br>Ma11_g17480<br>Ma06_g16830<br>Ma02_g13070<br>Ma03_g14250<br>Ma03_g17510<br>Ma09_g26520<br>Ma06_g38960<br>Ma04_g06200 | osa:4342988<br>osa:4325710<br>osa:4325707<br>osa:4325710<br>osa:4332455<br>osa:4347319<br>osa:4346877<br>osa:4349192<br>osa:4346877<br>osa:4326828<br>osa:4325764<br>osa:4332455<br>osa:4346877<br>osa:4336886<br>osa:4336627<br>osa:4329889<br>osa:4346877<br>osa:4337696<br>osa:4351008<br>osa:4324526<br>osa:4331535<br>osa:4346337<br>osa:4339892<br>osa:4346877<br>osa:4336353<br>osa:4342996 | 4342988<br>4325710<br>4325707<br>4325710<br>4332455<br>4347319<br>4346877<br>4349192<br>4346877<br>4326828<br>4325764<br>4332455<br>4346877<br>4336886<br>4336627<br>4329889<br>4346877<br>4337696<br>4351008<br>4324526<br>4331535<br>4346337<br>4339892<br>4346877<br>4336353<br>4342996 |  |  |
| <a href="#">Phagosome</a>                                              | 26 | 80 | 0.535694730501 | 0.99999998471 | Ma02_g03320<br>Ma04_g37240<br>Ma04_g13410<br>Ma04_g12700<br>Ma08_g05390<br>Ma07_g16530<br>Ma05_g29040<br>Ma09_g23510<br>Ma07_g03930<br>Ma03_g06030<br>Ma05_g03860                                                                                                                                                                                                                                  | osa:4341810<br>osa:4327731<br>osa:4337284<br>osa:4345097<br>osa:4327833<br>osa:4352862<br>osa:4328420<br>osa:4341751<br>osa:4329132<br>osa:4330693<br>osa:4327713                                                                                                                                                                                                                                  | 4341810<br>4327731<br>4337284<br>4345097<br>4327833<br>4352862<br>4328420<br>4341751<br>4329132<br>4330693<br>4327713                                                                                                                                                                      |  |  |

|                                                               |    |    |                |                |                                                                                                                                                                                                                                                             |                                                                                                                                                                                                                                                             |                                                                                                                                                                                         |  |  |
|---------------------------------------------------------------|----|----|----------------|----------------|-------------------------------------------------------------------------------------------------------------------------------------------------------------------------------------------------------------------------------------------------------------|-------------------------------------------------------------------------------------------------------------------------------------------------------------------------------------------------------------------------------------------------------------|-----------------------------------------------------------------------------------------------------------------------------------------------------------------------------------------|--|--|
|                                                               |    |    |                |                | Ma10_g29910<br>Ma03_g19260<br>Ma09_g26290<br>Ma07_g25660<br>Ma05_g16910<br>Ma07_g20040<br>Ma05_g18380<br>Ma04_g05470<br>Ma09_g13100<br>Ma06_g10030<br>Ma04_g11950<br>Ma06_g06270<br>Ma11_g13680<br>Ma09_g05400<br>Ma10_g06890                               | osa:4345628<br>osa:4326917<br>osa:4334384<br>osa:4327929<br>osa:4326917<br>osa:4345628<br>osa:4337563<br>osa:9271327<br>osa:4341707<br>osa:4326917<br>osa:4327550<br>osa:4350197<br>osa:4339262<br>osa:4327180<br>osa:4327180                               | 4345628<br>4326917<br>4334384<br>4327929<br>4326917<br>4345628<br>4337563<br>9271327<br>4341707<br>4326917<br>4327550<br>4350197<br>4339262<br>4327180<br>4327180                       |  |  |
| <a href="#">Sesquiterpenoid and triterpenoid biosynthesis</a> | 2  | 5  | 0.542764831954 | 0.999999998471 | Ma08_g04920<br>Ma08_g04900                                                                                                                                                                                                                                  | osa:4332153<br>osa:4332153                                                                                                                                                                                                                                  | 4332153<br>4332153                                                                                                                                                                      |  |  |
| <a href="#">Tyrosine metabolism</a>                           | 12 | 37 | 0.556204777175 | 0.999999998471 | Ma04_g25530<br>Ma08_g29910<br>Ma07_g11500<br>Ma09_g08110<br>Ma00_g05010<br>Ma11_g15760<br>Ma08_g29610<br>Ma10_g16940<br>Ma02_g09950<br>Ma09_g29570<br>Ma04_g31940<br>Ma07_g11510                                                                            | osa:4331130<br>osa:4350053<br>osa:4331893<br>osa:4350053<br>osa:4335335<br>osa:4343080<br>osa:4329692<br>osa:4336153<br>osa:4350053<br>osa:4329101<br>osa:4330090<br>osa:4331893                                                                            | 4331130<br>4350053<br>4331893<br>4350053<br>4335335<br>4343080<br>4329692<br>4336153<br>4350053<br>4329101<br>4330090<br>4331893                                                        |  |  |
| <a href="#">Galactose metabolism</a>                          | 17 | 54 | 0.589734685756 | 0.999999998471 | Ma07_g13520<br>Ma10_g15780<br>Ma07_g01870<br>Ma05_g24340<br>Ma06_g37010<br>Ma06_g28330<br>Ma03_g16650<br>Ma07_g11340<br>Ma08_g15070<br>Ma02_g18360<br>Ma05_g09350<br>Ma10_g15800<br>Ma11_g24070<br>Ma07_g10560<br>Ma06_g10450<br>Ma09_g11280<br>Ma09_g23530 | osa:4327301<br>osa:4335789<br>osa:4342703<br>osa:4341967<br>osa:4345925<br>osa:4339812<br>osa:4339812<br>osa:4348582<br>osa:4348230<br>osa:4327301<br>osa:4339457<br>osa:4335789<br>osa:4341824<br>osa:4327301<br>osa:4345925<br>osa:4348138<br>osa:4336928 | 4327301<br>4335789<br>4342703<br>4341967<br>4345925<br>4339812<br>4339812<br>4348582<br>4348230<br>4327301<br>4339457<br>4335789<br>4341824<br>4327301<br>4345925<br>4348138<br>4336928 |  |  |
| <a href="#">Porphyrin and chlorophyll metabolism</a>          | 11 | 35 | 0.593958950972 | 0.999999998471 | Ma10_g05100<br>Ma06_g06810<br>Ma06_g24480<br>Ma09_g14110<br>Ma06_g09580<br>Ma10_g26330<br>Ma08_g14810<br>Ma06_g23970<br>Ma06_g00500<br>Ma08_g24890<br>Ma04_g31690                                                                                           | osa:4326901<br>osa:4341462<br>osa:4332771<br>osa:4341997<br>osa:4346136<br>osa:4327178<br>osa:4349044<br>osa:4326635<br>osa:4328118<br>osa:4330711<br>osa:4331611                                                                                           | 4326901<br>4341462<br>4332771<br>4341997<br>4346136<br>4327178<br>4349044<br>4326635<br>4328118<br>4330711<br>4331611                                                                   |  |  |
| <a href="#">Folate biosynthesis</a>                           | 6  | 19 | 0.600027438467 | 0.999999998471 | Ma10_g14640<br>Ma09_g31410<br>Ma08_g00920<br>Ma10_g02550<br>Ma08_g25440<br>Ma09_g31420                                                                                                                                                                      | osa:4331360<br>osa:4347851<br>osa:4337297<br>osa:4326358<br>osa:4328260<br>osa:4347851                                                                                                                                                                      | 4331360<br>4347851<br>4337297<br>4326358<br>4328260<br>4347851                                                                                                                          |  |  |
| <a href="#">Limonene and pinene degradation</a>               | 4  | 14 | 0.677447351546 | 0.999999998471 | Ma05_g05010<br>Ma07_g09040<br>Ma07_g06700<br>Ma03_g06120                                                                                                                                                                                                    | osa:4340725<br>osa:4341325<br>osa:4349111<br>osa:4340725                                                                                                                                                                                                    | 4340725<br>4341325<br>4349111<br>4340725                                                                                                                                                |  |  |
| <a href="#">Tryptophan metabolism</a>                         | 6  | 21 | 0.680613005808 | 0.999999998471 | Ma03_g13760<br>Ma03_g10630<br>Ma11_g19670<br>Ma03_g06120<br>Ma05_g05010<br>Ma03_g14690                                                                                                                                                                      | osa:4334994<br>osa:4351695<br>osa:4334994<br>osa:4340725<br>osa:4340725<br>osa:4328073                                                                                                                                                                      | 4334994<br>4351695<br>4334994<br>4340725<br>4340725<br>4328073                                                                                                                          |  |  |
| <a href="#">Synthesis and degradation of ketone bodies</a>    | 2  | 7  | 0.687785698892 | 0.999999998471 | Ma03_g12070<br>Ma04_g10090                                                                                                                                                                                                                                  | osa:4331418<br>osa:4326266                                                                                                                                                                                                                                  | 4331418<br>4326266                                                                                                                                                                      |  |  |
| <a href="#">Lysine biosynthesis</a>                           | 4  | 15 | 0.720869893526 | 0.999999998471 | Ma05_g01700<br>Ma01_g16200<br>Ma06_g12620<br>Ma11_g13600                                                                                                                                                                                                    | osa:4346642<br>osa:4332563<br>osa:4334188<br>osa:4332563                                                                                                                                                                                                    | 4346642<br>4332563<br>4334188<br>4332563                                                                                                                                                |  |  |
| <a href="#">Photosynthesis - antenna proteins</a>             | 4  | 15 | 0.720869893526 | 0.999999998471 | Ma10_g15370<br>Ma09_g06640<br>Ma04_g07920                                                                                                                                                                                                                   | osa:4324599<br>osa:4324599<br>osa:4324599                                                                                                                                                                                                                   | 4324599<br>4324599<br>4324599                                                                                                                                                           |  |  |

|                                                               |    |    |                |                |                                                                                                                                                                                                                                                                                                                         |                                                                                                                                                                                                                                                                                                                         |                                                                                                                                                                                                                                     |  |  |
|---------------------------------------------------------------|----|----|----------------|----------------|-------------------------------------------------------------------------------------------------------------------------------------------------------------------------------------------------------------------------------------------------------------------------------------------------------------------------|-------------------------------------------------------------------------------------------------------------------------------------------------------------------------------------------------------------------------------------------------------------------------------------------------------------------------|-------------------------------------------------------------------------------------------------------------------------------------------------------------------------------------------------------------------------------------|--|--|
|                                                               |    |    |                |                | Ma04_g14940                                                                                                                                                                                                                                                                                                             | osa:4324599                                                                                                                                                                                                                                                                                                             | 4324599                                                                                                                                                                                                                             |  |  |
| <a href="#">Glycosphingolipid biosynthesis - globo series</a> | 2  | 8  | 0.744829693731 | 0.999999998471 | Ma06_g01700<br>Ma06_g01670                                                                                                                                                                                                                                                                                              | osa:4324914<br>osa:4338802                                                                                                                                                                                                                                                                                              | 4324914<br>4338802                                                                                                                                                                                                                  |  |  |
| <a href="#">Arachidonic acid metabolism</a>                   | 3  | 12 | 0.750526267163 | 0.999999998471 | Ma06_g16830<br>Ma07_g11670<br>Ma05_g26600                                                                                                                                                                                                                                                                               | osa:4324526<br>osa:4333862<br>osa:4336627                                                                                                                                                                                                                                                                               | 4324526<br>4333862<br>4336627                                                                                                                                                                                                       |  |  |
| <a href="#">Pyruvate metabolism</a>                           | 21 | 75 | 0.761605341575 | 0.999999998471 | Ma10_g21340<br>Ma02_g03830<br>Ma05_g25700<br>Ma04_g35390<br>Ma07_g06750<br>Ma06_g07450<br>Ma11_g01870<br>Ma03_g32890<br>Ma03_g06120<br>Ma10_g25720<br>Ma09_g30880<br>Ma04_g01300<br>Ma05_g05010<br>Ma09_g20570<br>Ma08_g08880<br>Ma06_g28550<br>Ma07_g06760<br>Ma01_g17610<br>Ma06_g21080<br>Ma03_g14310<br>Ma10_g12590 | osa:4338007<br>osa:4338750<br>osa:4327423<br>osa:4349454<br>osa:4328012<br>osa:4338161<br>osa:4338324<br>osa:4326769<br>osa:4340725<br>osa:4345657<br>osa:4344858<br>osa:4352871<br>osa:4340725<br>osa:4337406<br>osa:4346159<br>osa:4345387<br>osa:4328012<br>osa:4337406<br>osa:4344858<br>osa:4346332<br>osa:4329518 | 4338007<br>4338750<br>4327423<br>4349454<br>4328012<br>4338161<br>4338324<br>4326769<br>4340725<br>4345657<br>4344858<br>4352871<br>4340725<br>4337406<br>4346159<br>4345387<br>4328012<br>4337406<br>4344858<br>4346332<br>4329518 |  |  |
| <a href="#">Biotin metabolism</a>                             | 5  | 20 | 0.769922665216 | 0.999999998471 | Ma08_g04460<br>Ma06_g01540<br>Ma06_g25950<br>Ma08_g20550<br>Ma04_g25940                                                                                                                                                                                                                                                 | osa:4340334<br>osa:4346185<br>osa:4334104<br>osa:4343598<br>osa:4345286                                                                                                                                                                                                                                                 | 4340334<br>4346185<br>4334104<br>4343598<br>4345286                                                                                                                                                                                 |  |  |
| <a href="#">Inositol phosphate metabolism</a>                 | 12 | 45 | 0.773637394749 | 0.999999998471 | Ma11_g24010<br>Ma03_g27370<br>Ma10_g29910<br>Ma03_g27870<br>Ma05_g31060<br>Ma04_g08270<br>Ma04_g28920<br>Ma09_g24600<br>Ma01_g14940<br>Ma05_g16190<br>Ma10_g11950<br>Ma07_g20040                                                                                                                                        | osa:4328439<br>osa:4347947<br>osa:4345628<br>osa:4347691<br>osa:4325211<br>osa:4341305<br>osa:4342610<br>osa:4347691<br>osa:4331917<br>osa:4331917<br>osa:4326465<br>osa:4345628                                                                                                                                        | 4328439<br>4347947<br>4345628<br>4347691<br>4325211<br>4341305<br>4342610<br>4347691<br>4331917<br>4331917<br>4326465<br>4345628                                                                                                    |  |  |
| <a href="#">Pantothenate and CoA biosynthesis</a>             | 6  | 24 | 0.780052862267 | 0.999999998471 | Ma05_g22240<br>Ma06_g24910<br>Ma06_g10670<br>Ma06_g30380<br>Ma03_g16070<br>Ma03_g16060                                                                                                                                                                                                                                  | osa:4343249<br>osa:4339677<br>osa:4347680<br>osa:4329938<br>osa:4339583<br>osa:4332151                                                                                                                                                                                                                                  | 4343249<br>4339677<br>4347680<br>4329938<br>4339583<br>4332151                                                                                                                                                                      |  |  |
| <a href="#">Phosphatidylinositol signaling system</a>         | 11 | 43 | 0.805201457506 | 0.999999998471 | Ma05_g08710<br>Ma07_g01400<br>Ma11_g24010<br>Ma03_g27370<br>Ma10_g29910<br>Ma03_g02590<br>Ma03_g26590<br>Ma01_g07590<br>Ma07_g20040<br>Ma01_g21300<br>Ma02_g03180                                                                                                                                                       | osa:4344344<br>osa:4344344<br>osa:4328439<br>osa:4347947<br>osa:4345628<br>osa:4352615<br>osa:4344344<br>osa:4326903<br>osa:4345628<br>osa:4344344<br>osa:4339172                                                                                                                                                       | 4344344<br>4344344<br>4328439<br>4347947<br>4345628<br>4352615<br>4344344<br>4326903<br>4345628<br>4344344<br>4339172                                                                                                               |  |  |
| <a href="#">Glycerophospholipid metabolism</a>                | 18 | 68 | 0.814914948312 | 0.999999998471 | Ma07_g10180<br>Ma01_g08090<br>Ma11_g18880<br>Ma03_g02590<br>Ma03_g21800<br>Ma09_g25530<br>Ma05_g29560<br>Ma01_g08380<br>Ma03_g25580<br>Ma01_g00390<br>Ma05_g12640<br>Ma05_g26380<br>Ma07_g11670<br>Ma10_g26890<br>Ma04_g26360<br>Ma06_g37750<br>Ma10_g11950<br>Ma07_g18790                                              | osa:4350917<br>osa:4327647<br>osa:4326817<br>osa:4352615<br>osa:4339554<br>osa:4325633<br>osa:4351119<br>osa:4347745<br>osa:4351119<br>osa:4337344<br>osa:4349006<br>osa:4347160<br>osa:4333862<br>osa:4327647<br>osa:4330302<br>osa:4327647<br>osa:4326465<br>osa:4347745                                              | 4350917<br>4327647<br>4326817<br>4352615<br>4339554<br>4325633<br>4351119<br>4347745<br>4351119<br>4337344<br>4349006<br>4347160<br>4333862<br>4327647<br>4330302<br>4327647<br>4326465<br>4347745                                  |  |  |
| <a href="#">C5-Branched dibasic acid metabolism</a>           | 1  | 5  | 0.814977325051 | 0.999999998471 | Ma06_g30380                                                                                                                                                                                                                                                                                                             | osa:4329938                                                                                                                                                                                                                                                                                                             | 4329938                                                                                                                                                                                                                             |  |  |

|                                                             |    |     |                |                |                                                                                                                                                                                                                                                                                                                                                                                                                                                                                                                                                                                                                                                                                                                                                                                                                                                                                                                                                                                                                                                                                                                                                                                                                                                                                                                                                                                                                                                                                                                                                                                                                                                                                                                                                                                                                                                                                                                                                                                                                                                                                                          |  |  |
|-------------------------------------------------------------|----|-----|----------------|----------------|----------------------------------------------------------------------------------------------------------------------------------------------------------------------------------------------------------------------------------------------------------------------------------------------------------------------------------------------------------------------------------------------------------------------------------------------------------------------------------------------------------------------------------------------------------------------------------------------------------------------------------------------------------------------------------------------------------------------------------------------------------------------------------------------------------------------------------------------------------------------------------------------------------------------------------------------------------------------------------------------------------------------------------------------------------------------------------------------------------------------------------------------------------------------------------------------------------------------------------------------------------------------------------------------------------------------------------------------------------------------------------------------------------------------------------------------------------------------------------------------------------------------------------------------------------------------------------------------------------------------------------------------------------------------------------------------------------------------------------------------------------------------------------------------------------------------------------------------------------------------------------------------------------------------------------------------------------------------------------------------------------------------------------------------------------------------------------------------------------|--|--|
| <a href="#">Glyoxylate and dicarboxylate metabolism</a>     | 15 | 58  | 0.821874423293 | 0.999999998471 | Ma06_g21190 osa:4337048 4337048<br>Ma06_g08130 osa:4352058 4352058<br>Ma07_g22000 osa:4345962 4345962<br>Ma03_g01840 osa:4343908 4343908<br>Ma09_g07020 osa:4352058 4352058<br>Ma04_g01300 osa:4352871 4352871<br>Ma01_g01610 osa:4349114 4349114<br>Ma10_g25720 osa:4345657 4345657<br>Ma07_g15870 osa:4328326 4328326<br>Ma05_g25700 osa:4327423 4327423<br>Ma06_g24830 osa:3131463 3131463<br>Ma05_g21330 osa:4327981 4327981<br>Ma03_g21060 osa:4330649 4330649<br>Ma00_g04030 osa:4330649 4330649<br>Ma03_g14690 osa:4328073 4328073                                                                                                                                                                                                                                                                                                                                                                                                                                                                                                                                                                                                                                                                                                                                                                                                                                                                                                                                                                                                                                                                                                                                                                                                                                                                                                                                                                                                                                                                                                                                                                |  |  |
| <a href="#">Protein processing in endoplasmic reticulum</a> | 58 | 203 | 0.82635791996  | 0.999999998471 | Ma09_g07430 osa:4351875 4351875<br>Novel00479 osa:4329219 4329219<br>Ma01_g14540 osa:4332357 4332357<br>Ma05_g23160 osa:4336483 4336483<br>Ma09_g23200 osa:4345893 4345893<br>Ma10_g21080 osa:4325341 4325341<br>Ma09_g19460 osa:4342702 4342702<br>Ma06_g13850 osa:4351875 4351875<br>Ma01_g14490 osa:4332361 4332361<br>Ma04_g11590 osa:4332360 4332360<br>Ma07_g24310 osa:4334781 4334781<br>Ma10_g26270 osa:4332538 4332538<br>Ma09_g12320 osa:4346639 4346639<br>Ma10_g16680 osa:4332237 4332237<br>Ma10_g20390 osa:4326152 4326152<br>Ma05_g18410 osa:4335881 4335881<br>Ma04_g26080 osa:4337331 4337331<br>Ma07_g19070 osa:4328114 4328114<br>Ma11_g07190 osa:4336483 4336483<br>Novel00994 osa:4342827 4342827<br>Ma10_g11310 osa:4350180 4350180<br>Ma08_g21660 osa:4351208 4351208<br>Ma02_g18000 osa:4351208 4351208<br>Ma09_g00500 osa:4332361 4332361<br>Ma01_g05370 osa:4324566 4324566<br>Ma06_g30090 osa:4351875 4351875<br>Ma08_g34730 osa:4339012 4339012<br>Ma02_g04060 osa:4326806 4326806<br>Ma10_g06370 osa:9267802 9267802<br>Ma08_g14870 osa:4327971 4327971<br>Ma07_g17020 osa:4335701 4335701<br>Ma10_g14420 osa:4338088 4338088<br>Ma08_g02190 osa:4332363 4332363<br>Ma04_g37750 osa:4333580 4333580<br>Ma07_g14960 osa:4332391 4332391<br>Ma08_g21650 osa:4351208 4351208<br>Ma06_g07350 osa:4328940 4328940<br>Ma10_g06820 osa:4328940 4328940<br>Ma03_g29390 osa:4345893 4345893<br>Ma04_g02540 osa:4328940 4328940<br>Ma07_g25660 osa:4327929 4327929<br>Ma11_g22310 osa:4339013 4339013<br>Ma06_g31680 osa:4333580 4333580<br>Ma08_g10290 osa:4327708 4327708<br>Ma09_g26390 osa:4333580 4333580<br>Ma05_g07260 osa:4337331 4337331<br>Ma09_g13100 osa:4341707 4341707<br>Ma09_g00490 osa:4332360 4332360<br>Ma07_g19020 osa:4342077 4342077<br>Ma10_g29000 osa:4334781 4334781<br>Ma04_g12700 osa:4345097 4345097<br>Ma09_g24030 osa:4331645 4331645<br>Ma03_g17190 osa:4328940 4328940<br>Ma11_g13680 osa:4339262 4339262<br>Ma03_g23000 osa:4350002 4350002<br>Ma09_g03950 osa:4351208 4351208<br>Ma01_g10230 osa:4350002 4350002<br>Ma02_g05870 osa:4336483 4336483 |  |  |
| <a href="#">Regulation of autophagy</a>                     | 6  | 26  | 0.832074498419 | 0.999999998471 | Ma05_g15170 osa:4336527 4336527<br>Ma11_g23590 osa:4349525 4349525<br>Ma03_g20520 osa:4325756 4325756<br>Ma11_g05750 osa:4325756 4325756<br>Ma02_g07930 osa:4334090 4334090<br>Ma06_g27130 osa:4336527 4336527                                                                                                                                                                                                                                                                                                                                                                                                                                                                                                                                                                                                                                                                                                                                                                                                                                                                                                                                                                                                                                                                                                                                                                                                                                                                                                                                                                                                                                                                                                                                                                                                                                                                                                                                                                                                                                                                                           |  |  |
| <a href="#">One carbon pool by folate</a>                   | 3  | 15  | 0.854536604203 | 0.999999998471 | Ma06_g08130 osa:4352058 4352058<br>Ma06_g21100 osa:4337051 4337051<br>Ma09_g07020 osa:4352058 4352058                                                                                                                                                                                                                                                                                                                                                                                                                                                                                                                                                                                                                                                                                                                                                                                                                                                                                                                                                                                                                                                                                                                                                                                                                                                                                                                                                                                                                                                                                                                                                                                                                                                                                                                                                                                                                                                                                                                                                                                                    |  |  |
| <a href="#">N-Glycan biosynthesis</a>                       | 8  | 35  | 0.861321660802 | 0.999999998471 | Ma04_g39490 osa:4331021 4331021<br>Ma07_g17020 osa:4335701 4335701<br>Ma10_g14420 osa:4338088 4338088                                                                                                                                                                                                                                                                                                                                                                                                                                                                                                                                                                                                                                                                                                                                                                                                                                                                                                                                                                                                                                                                                                                                                                                                                                                                                                                                                                                                                                                                                                                                                                                                                                                                                                                                                                                                                                                                                                                                                                                                    |  |  |

|                                                        |    |    |                |                |                                                                                                                                                                                                                                                                           |                                                                                                                                                                                                                                                                            |                                                                                                                                                                                                    |  |  |
|--------------------------------------------------------|----|----|----------------|----------------|---------------------------------------------------------------------------------------------------------------------------------------------------------------------------------------------------------------------------------------------------------------------------|----------------------------------------------------------------------------------------------------------------------------------------------------------------------------------------------------------------------------------------------------------------------------|----------------------------------------------------------------------------------------------------------------------------------------------------------------------------------------------------|--|--|
|                                                        |    |    |                |                | Ma05_g10890<br>Ma09_g19460<br>Ma05_g23550<br>Ma06_g12590<br>Ma08_g29090                                                                                                                                                                                                   | osa:4334626<br>osa:4342702<br>osa:4344180<br>osa:4352649<br>osa:4336162                                                                                                                                                                                                    | 4334626<br>4342702<br>4344180<br>4352649<br>4336162                                                                                                                                                |  |  |
| <a href="#">Fatty acid metabolism</a>                  | 18 | 72 | 0.870285548073 | 0.999999998471 | Ma08_g20550<br>Ma03_g03560<br>Ma03_g00220<br>Novel01373<br>Ma08_g32940<br>Ma08_g04460<br>Ma10_g03470<br>Ma04_g25940<br>Ma02_g24010<br>Ma09_g29260<br>Ma06_g02940<br>Ma08_g30510<br>Ma11_g15660<br>Ma02_g10050<br>Ma06_g25950<br>Ma03_g13720<br>Ma11_g23050<br>Ma08_g21900 | osa:4343598<br>osa:4330523<br>osa:4331150<br>osa:4339846<br>osa:4324844<br>osa:4340334<br>osa:4330523<br>osa:4345286<br>osa:4340986<br>osa:4340093<br>osa:4327738<br>osa:4344267<br>osa:4348804<br>osa:4351610<br>osa:4334104<br>osa:4331150<br>osa:4344389<br>osa:4344389 | 4343598<br>4330523<br>4331150<br>4339846<br>4324844<br>4340334<br>4330523<br>4345286<br>4340986<br>4340093<br>4327738<br>4344267<br>4348804<br>4351610<br>4334104<br>4331150<br>4344389<br>4344389 |  |  |
| <a href="#">Fatty acid elongation</a>                  | 5  | 24 | 0.873077299041 | 0.999999998471 | Ma10_g28390<br>Ma04_g32180<br>Ma07_g08400<br>Ma09_g06710<br>Ma04_g22350                                                                                                                                                                                                   | osa:4341445<br>osa:4332236<br>osa:4341445<br>osa:4339645<br>osa:4332236                                                                                                                                                                                                    | 4341445<br>4332236<br>4341445<br>4339645<br>4332236                                                                                                                                                |  |  |
| <a href="#">Isoquinoline alkaloid biosynthesis</a>     | 4  | 20 | 0.874496623126 | 0.999999998471 | Ma09_g29570<br>Ma11_g15760<br>Ma10_g16940<br>Ma00_g05010                                                                                                                                                                                                                  | osa:4329101<br>osa:4343080<br>osa:4336153<br>osa:4335335                                                                                                                                                                                                                   | 4329101<br>4343080<br>4336153<br>4335335                                                                                                                                                           |  |  |
| <a href="#">Butanoate metabolism</a>                   | 4  | 20 | 0.874496623126 | 0.999999998471 | Ma03_g12070<br>Ma04_g10090<br>Ma04_g37810<br>Ma06_g30380                                                                                                                                                                                                                  | osa:4331418<br>osa:4326266<br>osa:4333932<br>osa:4329938                                                                                                                                                                                                                   | 4331418<br>4326266<br>4333932<br>4329938                                                                                                                                                           |  |  |
| <a href="#">Selenocompound metabolism</a>              | 3  | 16 | 0.879599112455 | 0.999999998471 | Ma04_g28070<br>Ma08_g27570<br>Ma01_g07600                                                                                                                                                                                                                                 | osa:4352833<br>osa:4334073<br>osa:4334073                                                                                                                                                                                                                                  | 4352833<br>4334073<br>4334073                                                                                                                                                                      |  |  |
| <a href="#">Taurine and hypotaurine metabolism</a>     | 3  | 16 | 0.879599112455 | 0.999999998471 | Ma04_g37810<br>Ma06_g16830<br>Ma05_g06070                                                                                                                                                                                                                                 | osa:4333932<br>osa:4324526<br>osa:4339793                                                                                                                                                                                                                                  | 4333932<br>4324526<br>4339793                                                                                                                                                                      |  |  |
| <a href="#">Non-homologous end-joining</a>             | 1  | 7  | 0.894593071931 | 0.999999998471 | Ma04_g11140                                                                                                                                                                                                                                                               | osa:4334058                                                                                                                                                                                                                                                                | 4334058                                                                                                                                                                                            |  |  |
| <a href="#">2-Oxocarboxylic acid metabolism</a>        | 10 | 46 | 0.909844060255 | 0.999999998471 | Novel00760<br>Ma06_g12620<br>Ma06_g24910<br>Ma09_g07280<br>Ma05_g15910<br>Ma06_g30380<br>Ma11_g23060<br>Ma03_g16060<br>Ma03_g16070<br>Ma06_g38960                                                                                                                         | osa:4324442<br>osa:4334188<br>osa:4339677<br>osa:4329858<br>osa:4333177<br>osa:4329938<br>osa:4343164<br>osa:4332151<br>osa:4339583<br>osa:4336353                                                                                                                         | 4324442<br>4334188<br>4339677<br>4329858<br>4333177<br>4329938<br>4343164<br>4332151<br>4339583<br>4336353                                                                                         |  |  |
| <a href="#">Nicotinate and nicotinamide metabolism</a> | 2  | 13 | 0.913616942477 | 0.999999998471 | Ma03_g23860<br>Ma04_g11720                                                                                                                                                                                                                                                | osa:4346302<br>osa:4347802                                                                                                                                                                                                                                                 | 4346302<br>4347802                                                                                                                                                                                 |  |  |
| <a href="#">Vitamin B6 metabolism</a>                  | 1  | 8  | 0.920443993561 | 0.999999998471 | Ma08_g32190                                                                                                                                                                                                                                                               | osa:4342162                                                                                                                                                                                                                                                                | 4342162                                                                                                                                                                                            |  |  |
| <a href="#">Terpenoid backbone biosynthesis</a>        | 10 | 47 | 0.920636693493 | 0.999999998471 | Ma03_g12070<br>Ma10_g17260<br>Ma01_g17990<br>Ma05_g14980<br>Ma03_g26140<br>Ma08_g04770<br>Ma10_g03310<br>Ma05_g05920<br>Ma08_g24890<br>Ma04_g36760                                                                                                                        | osa:4331418<br>osa:4343523<br>osa:4343721<br>osa:4342614<br>osa:4338768<br>osa:4334003<br>osa:4327435<br>osa:4340090<br>osa:4330711<br>osa:4340251                                                                                                                         | 4331418<br>4343523<br>4343721<br>4342614<br>4338768<br>4334003<br>4327435<br>4340090<br>4330711<br>4340251                                                                                         |  |  |
| <a href="#">Fatty acid biosynthesis</a>                | 8  | 40 | 0.929561563742 | 0.999999998471 | Ma08_g20550<br>Ma08_g32940<br>Ma08_g04460<br>Ma04_g25940<br>Ma09_g29260<br>Ma06_g02940<br>Ma06_g25950<br>Ma02_g10050                                                                                                                                                      | osa:4343598<br>osa:4324844<br>osa:4340334<br>osa:4345286<br>osa:4340093<br>osa:4327738<br>osa:4334104<br>osa:4351610                                                                                                                                                       | 4343598<br>4324844<br>4340334<br>4345286<br>4340093<br>4327738<br>4334104<br>4351610                                                                                                               |  |  |
| <a href="#">Sulfur relay system</a>                    | 2  | 14 | 0.931202210704 | 0.999999998471 | Ma08_g25440<br>Ma09_g01760                                                                                                                                                                                                                                                | osa:4328260<br>osa:4329515                                                                                                                                                                                                                                                 | 4328260<br>4329515                                                                                                                                                                                 |  |  |
| <a href="#">Protein export</a>                         | 12 | 56 | 0.932416741078 | 0.999999998471 | Ma09_g26120<br>Ma09_g13100<br>Ma04_g12700                                                                                                                                                                                                                                 | osa:4324712<br>osa:4341707<br>osa:4345097                                                                                                                                                                                                                                  | 4324712<br>4341707<br>4345097                                                                                                                                                                      |  |  |

|                                                             |    |     |                |                |                                                                                                                                                                                                                                                                                                                                                                                                                                |                                                                                                                                                                                                                                                                                                                                                                                                                                                                |                                                                                                                                                                                                                                                                                                                                        |  |  |
|-------------------------------------------------------------|----|-----|----------------|----------------|--------------------------------------------------------------------------------------------------------------------------------------------------------------------------------------------------------------------------------------------------------------------------------------------------------------------------------------------------------------------------------------------------------------------------------|----------------------------------------------------------------------------------------------------------------------------------------------------------------------------------------------------------------------------------------------------------------------------------------------------------------------------------------------------------------------------------------------------------------------------------------------------------------|----------------------------------------------------------------------------------------------------------------------------------------------------------------------------------------------------------------------------------------------------------------------------------------------------------------------------------------|--|--|
|                                                             |    |     |                |                | Novel00479<br>Ma04_g27690<br>Ma02_g14460<br>Ma01_g07050<br>Ma07_g25660<br>Ma07_g08190<br>Ma10_g28590<br>Ma09_g03980<br>Ma10_g25180                                                                                                                                                                                                                                                                                             | osa:4329219<br>osa:4333514<br>osa:4333514<br>osa:4352133<br>osa:4327929<br>osa:4347239<br>osa:4347239<br>osa:4324524<br>osa:4324904                                                                                                                                                                                                                                                                                                                            | 4329219<br>4333514<br>4333514<br>4352133<br>4327929<br>4347239<br>4347239<br>4324524<br>4324904                                                                                                                                                                                                                                        |  |  |
| <a href="#">Alanine, aspartate and glutamate metabolism</a> | 8  | 41  | 0.938992046977 | 0.999999998471 | Ma07_g22000<br>Ma10_g18940<br>Ma02_g12240<br>Ma03_g27120<br>Ma04_g37810<br>Ma03_g21060<br>Ma00_g04030<br>Ma08_g28590                                                                                                                                                                                                                                                                                                           | osa:4345962<br>osa:4331779<br>osa:4330164<br>osa:4326346<br>osa:4333932<br>osa:4330649<br>osa:4330649<br>osa:4324398                                                                                                                                                                                                                                                                                                                                           | 4345962<br>4331779<br>4330164<br>4326346<br>4333932<br>4330649<br>4330649<br>4324398                                                                                                                                                                                                                                                   |  |  |
| <a href="#">Mismatch repair</a>                             | 8  | 42  | 0.947294033432 | 0.999999998471 | Ma00_g02630<br>Ma09_g22290<br>Ma03_g03030<br>Ma03_g01100<br>Ma05_g26770<br>Ma07_g18410<br>Ma07_g04480<br>Ma08_g16890                                                                                                                                                                                                                                                                                                           | osa:4327706<br>osa:4326564<br>osa:4326359<br>osa:4326359<br>osa:4325353<br>osa:4337442<br>osa:4331062<br>osa:4334389                                                                                                                                                                                                                                                                                                                                           | 4327706<br>4326564<br>4326359<br>4326359<br>4325353<br>4337442<br>4331062<br>4334389                                                                                                                                                                                                                                                   |  |  |
| <a href="#">Ubiquitin mediated proteolysis</a>              | 28 | 119 | 0.953260347946 | 0.999999998471 | Ma01_g23000<br>Ma11_g22700<br>Ma11_g19850<br>Ma09_g16250<br>Ma06_g19950<br>Ma09_g12320<br>Ma07_g14460<br>Novel00180<br>Ma04_g26080<br>Ma07_g19070<br>Ma10_g26170<br>Ma09_g00210<br>Ma01_g23720<br>Ma03_g05450<br>Ma06_g31510<br>Ma10_g20390<br>Novel01258<br>Ma01_g22160<br>Ma06_g28570<br>Ma06_g07350<br>Ma10_g06820<br>Ma04_g02540<br>Ma01_g19370<br>Ma11_g22310<br>Ma08_g12680<br>Ma08_g00590<br>Ma03_g17190<br>Ma05_g07260 | osa:4330430<br>osa:4336870<br>osa:4331448<br>osa:4344172<br>osa:4338850<br>osa:4346639<br>osa:4329066<br>osa:4326397<br>osa:4337331<br>osa:4328114<br>osa:4329066<br>osa:4324290<br>osa:4330430<br>osa:4331446<br>osa:4333728<br>osa:4326152<br>osa:4330430<br>osa:4330430<br>osa:4325905<br>osa:4328940<br>osa:4328940<br>osa:4328940<br>osa:4328940<br>osa:4330430<br>osa:4339013<br>osa:4339013<br>osa:4348796<br>osa:4327237<br>osa:4328940<br>osa:4337331 | 4330430<br>4336870<br>4331448<br>4344172<br>4338850<br>4346639<br>4329066<br>4326397<br>4337331<br>4328114<br>4329066<br>4324290<br>4330430<br>4331446<br>4333728<br>4326152<br>4330430<br>4330430<br>4325905<br>4328940<br>4328940<br>4328940<br>4328940<br>4330430<br>4339013<br>4339013<br>4348796<br>4327237<br>4328940<br>4337331 |  |  |
| <a href="#">Diterpenoid biosynthesis</a>                    | 4  | 27  | 0.965093654715 | 0.999999998471 | Ma03_g28580<br>Ma02_g01570<br>Ma10_g20860<br>Ma10_g21550                                                                                                                                                                                                                                                                                                                                                                       | osa:4339885<br>osa:4334841<br>osa:4336960<br>osa:4325145                                                                                                                                                                                                                                                                                                                                                                                                       | 4339885<br>4334841<br>4336960<br>4325145                                                                                                                                                                                                                                                                                               |  |  |
| <a href="#">Citrate cycle (TCA cycle)</a>                   | 9  | 50  | 0.970263586407 | 0.999999998471 | Novel00760<br>Ma05_g25700<br>Ma11_g21050<br>Ma10_g25720<br>Ma08_g08880<br>Ma04_g01300<br>Ma08_g06070<br>Ma06_g38960<br>Ma09_g07280                                                                                                                                                                                                                                                                                             | osa:4324442<br>osa:4327423<br>osa:4330016<br>osa:4345657<br>osa:4346159<br>osa:4352871<br>osa:4352549<br>osa:4336353<br>osa:4329858                                                                                                                                                                                                                                                                                                                            | 4324442<br>4327423<br>4330016<br>4345657<br>4346159<br>4352871<br>4352549<br>4336353<br>4329858                                                                                                                                                                                                                                        |  |  |
| <a href="#">Lysine degradation</a>                          | 3  | 25  | 0.981067811724 | 0.999999998471 | Ma05_g05010<br>Ma05_g29990<br>Ma03_g06120                                                                                                                                                                                                                                                                                                                                                                                      | osa:4340725<br>osa:4339168<br>osa:4340725                                                                                                                                                                                                                                                                                                                                                                                                                      | 4340725<br>4339168<br>4340725                                                                                                                                                                                                                                                                                                          |  |  |
| <a href="#">RNA polymerase</a>                              | 6  | 44  | 0.991457022413 | 0.999999998471 | Ma07_g05720<br>Ma06_g27690<br>Ma10_g17250<br>Ma04_g20190<br>Ma10_g18010<br>Ma10_g21000                                                                                                                                                                                                                                                                                                                                         | osa:4352511<br>osa:4351671<br>osa:4342517<br>osa:4331295<br>osa:4333888<br>osa:4325336                                                                                                                                                                                                                                                                                                                                                                         | 4352511<br>4351671<br>4342517<br>4331295<br>4333888<br>4325336                                                                                                                                                                                                                                                                         |  |  |
| <a href="#">RNA degradation</a>                             | 17 | 92  | 0.991470079071 | 0.999999998471 | Ma09_g30300<br>Ma01_g03570<br>Ma09_g00960<br>Ma11_g06010<br>Ma07_g17220<br>Ma03_g23620<br>Ma10_g13820<br>Ma07_g05920<br>Ma09_g17850                                                                                                                                                                                                                                                                                            | osa:4337457<br>osa:4340042<br>osa:4336331<br>osa:4339910<br>osa:4331095<br>osa:4325074<br>osa:4325469<br>osa:4331379<br>osa:4339910                                                                                                                                                                                                                                                                                                                            | 4337457<br>4340042<br>4336331<br>4339910<br>4331095<br>4325074<br>4325469<br>4331379<br>4339910                                                                                                                                                                                                                                        |  |  |



|                                            |    |     |                |                |                                                                                                                                                                                                                                                                                                                                                                                                                                                 |                                                                                                                                                                                                                                                                                                                                                                                                                                                 |                                                                                                                                                                                                                                                                                                                             |  |  |
|--------------------------------------------|----|-----|----------------|----------------|-------------------------------------------------------------------------------------------------------------------------------------------------------------------------------------------------------------------------------------------------------------------------------------------------------------------------------------------------------------------------------------------------------------------------------------------------|-------------------------------------------------------------------------------------------------------------------------------------------------------------------------------------------------------------------------------------------------------------------------------------------------------------------------------------------------------------------------------------------------------------------------------------------------|-----------------------------------------------------------------------------------------------------------------------------------------------------------------------------------------------------------------------------------------------------------------------------------------------------------------------------|--|--|
|                                            |    |     |                |                | Ma05_g05050<br>Ma03_g28660<br>Ma01_g00690<br>Ma11_g08900<br>Ma02_g07050<br>Ma11_g20920<br>Ma10_g09070<br>Novel01023                                                                                                                                                                                                                                                                                                                             | osa:4340042<br>osa:4339910<br>osa:4331006<br>osa:4335963<br>osa:4331006<br>osa:4348176<br>osa:4348824<br>osa:4349826                                                                                                                                                                                                                                                                                                                            | 4340042<br>4339910<br>4331006<br>4335963<br>4331006<br>4348176<br>4348824<br>4349826                                                                                                                                                                                                                                        |  |  |
| <a href="#">Purine metabolism</a>          | 27 | 135 | 0.994131692559 | 0.999999998471 | Ma02_g13970<br>Ma03_g05860<br>Ma06_g30180<br>Ma04_g10990<br>Ma07_g24940<br>Ma07_g05720<br>Ma04_g39070<br>Ma03_g23680<br>Ma06_g27690<br>Ma04_g20190<br>Ma08_g15070<br>Ma10_g13290<br>Ma06_g17200<br>Ma03_g03600<br>Ma05_g18090<br>Ma05_g20350<br>Ma05_g01630<br>Ma10_g17250<br>Ma04_g19680<br>Ma00_g02390<br>Ma04_g35390<br>Ma08_g27570<br>Ma10_g18010<br>Ma09_g20570<br>Ma10_g21000<br>Ma01_g17610<br>Ma01_g07600                               | osa:4328168<br>osa:4329701<br>osa:4350358<br>osa:4343681<br>osa:4344470<br>osa:4352511<br>osa:4352670<br>osa:4324793<br>osa:4351671<br>osa:4331295<br>osa:4348230<br>osa:4344386<br>osa:4344386<br>osa:4328168<br>osa:4344854<br>osa:4334308<br>osa:4352670<br>osa:4342517<br>osa:4333020<br>osa:4344315<br>osa:4349454<br>osa:4334073<br>osa:4333888<br>osa:4337406<br>osa:4325336<br>osa:4337406<br>osa:4334073                               | 4328168<br>4329701<br>4350358<br>4343681<br>4344470<br>4352511<br>4352670<br>4324793<br>4351671<br>4331295<br>4348230<br>4344386<br>4344386<br>4328168<br>4344854<br>4334308<br>4352670<br>4342517<br>4333020<br>4344315<br>4349454<br>4334073<br>4333888<br>4337406<br>4325336<br>4337406<br>4334073                       |  |  |
| <a href="#">Oxidative phosphorylation</a>  | 29 | 144 | 0.994874413158 | 0.999999998471 | Ma09_g19700<br>Ma04_g37240<br>mito3_g00150<br>Novel01453<br>Ma06_g04550<br>Ma08_g05390<br>Ma05_g02000<br>Ma03_g04410<br>Ma10_g09000<br>Ma03_g23630<br>Ma09_g23510<br>Ma03_g29190<br>Ma11_g10950<br>Ma04_g13410<br>Ma05_g04210<br>Ma09_g30540<br>Ma04_g31640<br>Ma04_g13500<br>Ma01_g17210<br>Ma09_g26790<br>Ma10_g29140<br>Ma07_g22370<br>Ma02_g07140<br>Ma05_g23990<br>Ma05_g18380<br>Ma03_g21780<br>Ma05_g16030<br>Ma05_g08470<br>Ma02_g06820 | osa:4345078<br>osa:4327731<br>osa:6450138<br>osa:6450140<br>osa:4341645<br>osa:4327833<br>osa:4334276<br>osa:4337257<br>osa:4331914<br>osa:4338911<br>osa:4341751<br>osa:4337257<br>osa:4344095<br>osa:4337284<br>osa:4337257<br>osa:4349859<br>osa:4343366<br>osa:4324151<br>osa:4330737<br>osa:4330852<br>osa:4339127<br>osa:4340298<br>osa:4341645<br>osa:4329497<br>osa:4337563<br>osa:4339546<br>osa:4343288<br>osa:4334266<br>osa:4337257 | 4345078<br>4327731<br>6450138<br>6450140<br>4341645<br>4327833<br>4334276<br>4337257<br>4331914<br>4338911<br>4341751<br>4337257<br>4344095<br>4337284<br>4337257<br>4349859<br>4343366<br>4324151<br>4330737<br>4330852<br>4339127<br>4340298<br>4341645<br>4329497<br>4337563<br>4339546<br>4343288<br>4334266<br>4337257 |  |  |
| <a href="#">Nucleotide excision repair</a> | 11 | 70  | 0.994884054687 | 0.999999998471 | Ma00_g02630<br>Ma02_g00580<br>Ma03_g03030<br>Ma03_g01100<br>Ma10_g00880<br>Ma10_g20390<br>Ma07_g04480<br>Ma02_g24270<br>Ma09_g16500<br>Ma08_g16890<br>Ma10_g01030                                                                                                                                                                                                                                                                               | osa:4327706<br>osa:4331991<br>osa:4326359<br>osa:4326359<br>osa:4331991<br>osa:4326152<br>osa:4331062<br>osa:4340268<br>osa:4338689<br>osa:4334389<br>osa:4331991                                                                                                                                                                                                                                                                               | 4327706<br>4331991<br>4326359<br>4326359<br>4331991<br>4326152<br>4331062<br>4340268<br>4338689<br>4334389<br>4331991                                                                                                                                                                                                       |  |  |
| <a href="#">Photosynthesis</a>             | 13 | 79  | 0.995057712848 | 0.999999998471 | Ma01_g17210<br>Ma06_g30010<br>Ma07_g24600<br>Ma04_g22620<br>Ma01_g04250<br>Ma01_g07340<br>Ma01_g10240<br>Ma09_g25040<br>Ma05_g20780<br>Ma04_g31640                                                                                                                                                                                                                                                                                              | osa:4330737<br>osa:4344539<br>osa:4324933<br>osa:4339874<br>osa:4332745<br>osa:4339593<br>osa:4324933<br>osa:4343570<br>osa:4333746<br>osa:4343366                                                                                                                                                                                                                                                                                              | 4330737<br>4344539<br>4324933<br>4339874<br>4332745<br>4339593<br>4324933<br>4343570<br>4333746<br>4343366                                                                                                                                                                                                                  |  |  |

|                                                   |    |     |                |                |                                                                                                                                                                                                                                                                                                                                                                                                                 |                                                                                                                                                                                                                                                                                                                                                                                                                   |                                                                                                                                                                                                                                                                                                       |  |  |
|---------------------------------------------------|----|-----|----------------|----------------|-----------------------------------------------------------------------------------------------------------------------------------------------------------------------------------------------------------------------------------------------------------------------------------------------------------------------------------------------------------------------------------------------------------------|-------------------------------------------------------------------------------------------------------------------------------------------------------------------------------------------------------------------------------------------------------------------------------------------------------------------------------------------------------------------------------------------------------------------|-------------------------------------------------------------------------------------------------------------------------------------------------------------------------------------------------------------------------------------------------------------------------------------------------------|--|--|
|                                                   |    |     |                |                | Ma06_g22930<br>Ma09_g31020<br>Ma00_g01500                                                                                                                                                                                                                                                                                                                                                                       | osa:3131406<br>osa:4344899<br>osa:4351694                                                                                                                                                                                                                                                                                                                                                                         | 3131406<br>4344899<br>4351694                                                                                                                                                                                                                                                                         |  |  |
| <a href="#">Base excision repair</a>              | 5  | 43  | 0.996075565534 | 0.999999998471 | Ma00_g04410<br>Ma09_g18880<br>Ma07_g04480<br>Ma09_g08730<br>Ma03_g20210                                                                                                                                                                                                                                                                                                                                         | osa:4340610<br>osa:4327631<br>osa:4331062<br>osa:4329546<br>osa:9268162                                                                                                                                                                                                                                                                                                                                           | 4340610<br>4327631<br>4331062<br>4329546<br>9268162                                                                                                                                                                                                                                                   |  |  |
| <a href="#">Basal transcription factors</a>       | 4  | 41  | 0.998089655094 | 0.999999998471 | Ma02_g24270<br>Ma07_g14950<br>Ma09_g16500<br>Ma08_g04080                                                                                                                                                                                                                                                                                                                                                        | osa:4340268<br>osa:4338303<br>osa:4338689<br>osa:4338489                                                                                                                                                                                                                                                                                                                                                          | 4340268<br>4338303<br>4338689<br>4338489                                                                                                                                                                                                                                                              |  |  |
| <a href="#">DNA replication</a>                   | 6  | 54  | 0.998776823359 | 0.999999998471 | Ma00_g02630<br>Ma09_g22290<br>Ma03_g03030<br>Ma03_g01100<br>Ma07_g04480<br>Ma08_g16890                                                                                                                                                                                                                                                                                                                          | osa:4327706<br>osa:4326564<br>osa:4326359<br>osa:4326359<br>osa:4331062<br>osa:4334389                                                                                                                                                                                                                                                                                                                            | 4327706<br>4326564<br>4326359<br>4326359<br>4331062<br>4334389                                                                                                                                                                                                                                        |  |  |
| <a href="#">Pyrimidine metabolism</a>             | 18 | 112 | 0.999090794187 | 0.999999998471 | Ma07_g25460<br>Ma05_g22240<br>Ma03_g23860<br>Ma07_g05720<br>Ma06_g22860<br>Ma03_g05860<br>Ma11_g14310<br>Ma10_g17250<br>Ma04_g20190<br>Ma10_g18010<br>Ma08_g34680<br>Ma10_g21000<br>Ma03_g26340<br>Ma00_g02390<br>Ma03_g33280<br>Ma06_g27690<br>Ma03_g27120<br>Ma04_g18630                                                                                                                                      | osa:4325937<br>osa:4343249<br>osa:4346302<br>osa:4352511<br>osa:4345970<br>osa:4329701<br>osa:4326794<br>osa:4342517<br>osa:4331295<br>osa:4333888<br>osa:4328991<br>osa:4325336<br>osa:4339675<br>osa:4344315<br>osa:4339675<br>osa:4351671<br>osa:4326346<br>osa:4330910                                                                                                                                        | 4325937<br>4343249<br>4346302<br>4352511<br>4345970<br>4329701<br>4326794<br>4342517<br>4331295<br>4333888<br>4328991<br>4325336<br>4339675<br>4344315<br>4339675<br>4351671<br>4326346<br>4330910                                                                                                    |  |  |
| <a href="#">RNA transport</a>                     | 27 | 151 | 0.999198397886 | 0.999999998471 | Novel00268<br>Ma10_g22060<br>Ma08_g25720<br>Ma07_g06260<br>Ma07_g25820<br>Ma05_g05900<br>Ma08_g25330<br>Ma10_g26270<br>Ma11_g21440<br>Ma10_g22900<br>Ma11_g11420<br>Ma01_g08110<br>Ma03_g05450<br>Ma05_g06180<br>Ma05_g30450<br>Ma11_g00380<br>Ma10_g17580<br>Ma10_g13420<br>Ma09_g00960<br>Ma11_g01580<br>Ma06_g16850<br>Ma02_g15900<br>Ma03_g29330<br>Ma01_g23590<br>Novel00994<br>Ma06_g03260<br>Ma07_g21170 | osa:9272123<br>osa:4328994<br>osa:4346861<br>osa:4346657<br>osa:4329091<br>osa:4325312<br>osa:9272123<br>osa:4332538<br>osa:4343565<br>osa:4331813<br>osa:4345234<br>osa:4343445<br>osa:4331446<br>osa:4328286<br>osa:4338508<br>osa:4352748<br>osa:4343885<br>osa:4331813<br>osa:4336331<br>osa:4339487<br>osa:4332426<br>osa:4343445<br>osa:4329958<br>osa:4328129<br>osa:4342827<br>osa:4325312<br>osa:4341966 | 9272123<br>4328994<br>4346861<br>4346657<br>4329091<br>4325312<br>9272123<br>4332538<br>4343565<br>4331813<br>4345234<br>4343445<br>4331446<br>4328286<br>4338508<br>4352748<br>4343885<br>4331813<br>4336331<br>4339487<br>4332426<br>4343445<br>4329958<br>4328129<br>4342827<br>4325312<br>4341966 |  |  |
| <a href="#">Homologous recombination</a>          | 5  | 53  | 0.999517955441 | 0.999999998471 | Ma03_g01100<br>Ma10_g18640<br>Ma00_g02630<br>Ma09_g22290<br>Ma03_g03030                                                                                                                                                                                                                                                                                                                                         | osa:4326359<br>osa:4350923<br>osa:4327706<br>osa:4326564<br>osa:4326359                                                                                                                                                                                                                                                                                                                                           | 4326359<br>4350923<br>4327706<br>4326564<br>4326359                                                                                                                                                                                                                                                   |  |  |
| <a href="#">Ribosome biogenesis in eukaryotes</a> | 10 | 90  | 0.999937688376 | 0.999999998471 | Ma06_g24800<br>Ma08_g09760<br>Ma11_g00580<br>Ma06_g03260<br>Ma03_g03000<br>Ma02_g19150<br>Ma05_g05900<br>Ma04_g29900<br>Novel01023<br>Ma07_g17880                                                                                                                                                                                                                                                               | osa:4343836<br>osa:4332840<br>osa:4344029<br>osa:4325312<br>osa:4334688<br>osa:4333588<br>osa:4325312<br>osa:4329057<br>osa:4349826<br>osa:4342225                                                                                                                                                                                                                                                                | 4343836<br>4332840<br>4344029<br>4325312<br>4334688<br>4333588<br>4325312<br>4329057<br>4349826<br>4342225                                                                                                                                                                                            |  |  |
| <a href="#">mRNA surveillance pathway</a>         | 12 | 107 | 0.999982676481 | 0.999999998471 | Ma05_g06260<br>Ma00_g01270<br>Ma04_g35150<br>Ma08_g20050<br>Ma09_g00960<br>Ma09_g29350                                                                                                                                                                                                                                                                                                                          | osa:4328769<br>osa:4337821<br>osa:4334494<br>osa:4334494<br>osa:4336331<br>osa:4328733                                                                                                                                                                                                                                                                                                                            | 4328769<br>4337821<br>4334494<br>4334494<br>4336331<br>4328733                                                                                                                                                                                                                                        |  |  |

|                                             |    |     |                |                |                                                                                                                                                                                                                                                                                                                                                                                                                                |                                                                                                                                                                                                                                                                                                                                                                                                                                  |                                                                                                                                                                                                                                                                                                                  |  |  |
|---------------------------------------------|----|-----|----------------|----------------|--------------------------------------------------------------------------------------------------------------------------------------------------------------------------------------------------------------------------------------------------------------------------------------------------------------------------------------------------------------------------------------------------------------------------------|----------------------------------------------------------------------------------------------------------------------------------------------------------------------------------------------------------------------------------------------------------------------------------------------------------------------------------------------------------------------------------------------------------------------------------|------------------------------------------------------------------------------------------------------------------------------------------------------------------------------------------------------------------------------------------------------------------------------------------------------------------|--|--|
|                                             |    |     |                |                | Ma03_g10420<br>Ma06_g16850<br>Ma11_g23760<br>Ma03_g02170<br>Ma11_g12380<br>Ma04_g31750                                                                                                                                                                                                                                                                                                                                         | osa:4347363<br>osa:4332426<br>osa:4326473<br>osa:4350986<br>osa:4326473<br>osa:4332369                                                                                                                                                                                                                                                                                                                                           | 4347363<br>4332426<br>4326473<br>4350986<br>4326473<br>4332369                                                                                                                                                                                                                                                   |  |  |
| <a href="#">Proteasome</a>                  | 4  | 64  | 0.999990567681 | 0.999999998471 | Ma06_g03710<br>Novel01107<br>Ma10_g16670<br>Ma07_g23430                                                                                                                                                                                                                                                                                                                                                                        | osa:4340253<br>osa:4344373<br>osa:4336206<br>osa:4329182                                                                                                                                                                                                                                                                                                                                                                         | 4340253<br>4344373<br>4336206<br>4329182                                                                                                                                                                                                                                                                         |  |  |
| <a href="#">Spliceosome</a>                 | 28 | 196 | 0.999997933999 | 0.999999998471 | Ma09_g07430<br>Ma06_g13850<br>Ma07_g00810<br>Ma02_g18000<br>Ma09_g12480<br>Ma09_g14000<br>Ma04_g03360<br>Ma07_g06260<br>Ma07_g20610<br>Ma05_g24890<br>Ma08_g10020<br>Ma08_g21660<br>Novel01291<br>Ma05_g17410<br>Ma01_g10610<br>Novel00736<br>Ma08_g34730<br>Ma09_g12490<br>Ma06_g30090<br>Ma06_g16850<br>Ma09_g15600<br>Ma03_g23620<br>Ma06_g21110<br>Ma06_g14060<br>Ma05_g17110<br>Ma08_g21650<br>Ma04_g17280<br>Ma09_g03950 | osa:4351875<br>osa:4351875<br>osa:4347985<br>osa:4351208<br>osa:4345910<br>osa:4336619<br>osa:4352279<br>osa:4346657<br>osa:4337147<br>osa:4329810<br>osa:4332781<br>osa:4351208<br>osa:4333866<br>osa:4340964<br>osa:4328900<br>osa:4343339<br>osa:4339012<br>osa:4345254<br>osa:4351875<br>osa:4332426<br>osa:4329902<br>osa:4325074<br>osa:4328237<br>osa:4346506<br>osa:4348949<br>osa:4351208<br>osa:4333915<br>osa:4351208 | 4351875<br>4351875<br>4347985<br>4351208<br>4345910<br>4336619<br>4352279<br>4346657<br>4337147<br>4329810<br>4332781<br>4351208<br>4333866<br>4340964<br>4328900<br>4343339<br>4339012<br>4345254<br>4351875<br>4332426<br>4329902<br>4325074<br>4328237<br>4346506<br>4348949<br>4351208<br>4333915<br>4351208 |  |  |
| <a href="#">Aminoacyl-tRNA biosynthesis</a> | 6  | 114 | 0.999999998471 | 0.999999998471 | Ma08_g32300<br>Ma06_g20600<br>Ma05_g24170<br>Ma06_g00500<br>Novel01353<br>Ma00_g01370                                                                                                                                                                                                                                                                                                                                          | osa:4325717<br>osa:4325717<br>osa:4348825<br>osa:4328118<br>osa:4346920<br>osa:4352065                                                                                                                                                                                                                                                                                                                                           | 4325717<br>4325717<br>4348825<br>4328118<br>4346920<br>4352065                                                                                                                                                                                                                                                   |  |  |
